# Supplementary material
Source: PubMed Central journal article supplement (PMC4640679)
Supplement: NIHMS533504-supplement-Online_Supplement.pdf [file NIHMS533504-supplement-Online_Supplement.pdf]

## SUPPLEMENTAL MATERIAL

### EXTENDED METHODS

#### Human Valve Tissue

A whole genome expression microarray analysis was carried out on a random sample of 11 myxomatous and 11 non-myxomatous human mitral valves obtained during surgeries performed at Mayo Clinic in Rochester, MN. All studied valves were from patients older than 18 years of age at the time of surgery, and that had consented for the use of tissue for biomedical research purposes. Study protocol for tissue acquisition required the tissue to be processed immediately upon resection (i.e., within 5 minutes). Myxomatous mitral valve tissue was from patients with mitral regurgitation that underwent valve repair. A diagnosis of MMVD was made by the surgeon's visual assessment during cardiopulmonary bypass, and confirmed by a staff cardiovascular pathologist on the basis of macroscopic and microscopic (i.e., by Verhoeff-van Gieson [VVG]) staining. The portion of the mitral valve evaluated by the pathologist was dependent upon whether the patient had anterior, posterior or bileaflet mitral valve prolapse. Those with mitral stenosis, rheumatic heart disease, active endocarditis or mitral valve disease of known genetic origin (i.e. Marfan's syndrome, Loey's-Dietz) were not eligible for inclusion in the current study. In contrast, non-myxomatous mitral valves were obtained from explanted hearts in patients undergoing cardiac transplant operations. Explanted hearts were free of mitral valve disease, which was confirmed by the surgeon's evaluation of gross morphology. In spite of their non-diseased macroscopic appearance, mitral valves from transplant hearts were likely exposed to undue stress and thus are not truly "normal". The valves were, however, non-myxomatous and have historically been deemed as the best available controls for such exploratory and descriptive studies. In the interest of brevity and clarity, in manuscript figures, we refer to control, non-myxomatous valves as "normal" valves. Patient-specific data including demographics, surgical indication and baseline medications were abstracted from medical records (Tables S3-S5). Approximately two-thirds (7/11) of patients with myxomatous mitral valves were male versus 82% (9/11) of those with non-myxomatous valves ( $p=0.18$ ). Patients with myxomatous valves had a mean (SD) age of 67 (10) years as compared to 49 (15) years in

the non-myxomatous group ( $p < 0.05$ ). All study protocols were approved by the Mayo Clinic Institutional Review Board.

### **Animal Model**

Protocols pertaining to all animal studies were approved by the Mayo Clinic Institutional Animal Care and Use Committee (IACUC) and conformed to guidelines set forth by the National Institutes of Health and the Guide for the Care and Use of Laboratory Animals. C57BL/6 mice were aged to 3 months and maintained on standard mouse chow (Picolab5053; LabDiet) and housed in a pathogen-free facility. Mitral valves (both anterior and posterior leaflets) from 16 mice were employed for cell culture experiments (see Cell Culture below), whereas 46 mice were used for minipump experiments (see Angiotensin II minipumps below). Animals were euthanized using intraperitoneal injection of pentobarbital sodium (0.5 mL).

### **Angiotensin II Minipumps**

Young C57BL/6 mice were randomized to receive 14 days of 1) pressor doses of AngII (1000 ng/kg/min) for 2 weeks ( $n=21$ ), or 2) normal saline ( $n=23$ ), via osmotic minipumps (Alzet®). Using standard techniques, intra-peritoneal ketamine/xylazine injection at the minimum weight-adjusted dose was used as anesthesia. Under sterile conditions, one-centimeter transverse incisions were made in the upper back, and a cavity dissected for subcutaneous minipump implantation. Vicryl 6-0 sutures (Ethicon Inc) were used for incision closure. Daily non-invasive blood pressure measurements were carried out using tail-cuff methods, and mice were euthanized on day 15 post-minipump implantation. Mitral valves from 28 mice (AngII  $n=13$ , saline  $n=15$ ) were harvested for quantitative real-time PCR (qRT-PCR), and valves from 16 mice (AngII  $n=8$ , saline  $n=8$ ) were used for immunohistochemical analysis. All mice implanted with minipumps thrived normally. During the series of experiments, 1 mouse (AngII) was excluded because the minipump became dislodged prior to completion of the 14-days, and another mouse (AngII) was excluded due to premature death at day 10 post-implantation. The latter mouse died due to aortic aneurysm rupture.

## **Echocardiography**

On day 14 after minipump implantation, C57BL/6 mice receiving infusions of AngII or saline underwent echocardiographic evaluation using standard methods described elsewhere<sup>1-4</sup>. Apical 4-chamber, parasternal long-axis and modified 2-chamber views of the mitral valve were obtained. Specifically, the mitral valve was assessed for evidence of mitral regurgitation by measuring transvalvular blood velocity through the mitral valve orifice during diastole. Short- and long-axis views of the left ventricle were obtained to evaluate ventricular function, dimension and mass<sup>5</sup>.

## **Cell Culture**

Mitral valves interstitial cells from 4 non-myxomatous human mitral valves (separate from valves used for the microarray) and 16 C57BL/6 mice (pooled in groups of four) were harvested. Both anterior and posterior murine mitral valve leaflets were used. Mitral valves were pooled in keeping with standard culture techniques to ensure the growth of a large and sufficient number of cells for quantitative assays. Valvular cells were grown in complete media using standard outgrowth techniques (40% Dulbecco's modified Eagles medium, 40% Ham's F-10, 20% fetal bovine serum, 100U/mL penicillin and 100 ug/mL streptomycin) between passages 2 and 8, and harvested at 90–100% confluence. Isolated cells stained positive for vimentin and negative for CD68 and CD31, consistent with cells of fibroblast origin (i.e., MVICs). Cells were treated separately for 20 minutes and 24 hours with human recombinant transforming growth factor- $\beta$ 2 (TGF- $\beta$ 2) (R&D Systems; 10 ng/mL), human recombinant bone morphogenetic protein 4 (BMP4) (Gibco®, Life Technologies; 100 ng/mL) or normal saline as control. Twenty-four hour treatments represent a standard duration at which transcriptional changes can be observed, whereas 20 minute treatments were used to measure early phosphorylation of SMAD proteins, the magnitude of which may not be accurately captured at 24 hours.

## **RNA Extraction and cDNA Synthesis**

All mitral valve tissue was stored at -80°C prior to RNA extraction. Human mitral valves were pulverized. Human and murine mitral tissue was transferred to RNA lysis buffer (Invitrogen) and

1% 2-mercaptoethanol. Total RNA (30  $\mu$ L eluted) was extracted from lysates using spin columns (Invitrogen). RNA concentration and quality (260:280 ratio) were evaluated using a NanoDrop2000 spectrophotometer (Thermo Scientific). The 260:280 ratio of all RNA samples approximated 2.0 indicative of minimal-to-no contamination. Synthesis of complementary DNA (cDNA) was carried out using the Superscript VILO cDNA Synthesis Kit (Invitrogen) according to manufacturer instructions and within 24 hours of RNA isolation. All samples were stored at -80°C. A maximum of 2 reverse transcriptase reactions were carried out on each sample of RNA resulting in a maximum of 2 batches of cDNA.

### **Whole Genome Expression Microarray**

Gene expression levels were measured using Affymetrix Human Genome U133 Plus 2.0 expression arrays (Affymetrix, Santa Clara, California). Differential gene expression between myxomatous and non-myxomatous valves was defined as a minimum 1.5 fold-change in gene expression and a p-value <0.05. Please see the statistics section below for further details of data processing and analysis using for the whole genome expression microarrays.

### **Quantitative Real-Time PCR**

In human mitral valve tissue, quantitative real-time PCR (RT-PCR) was used to validate a subset of differentially regulated genes identified by the microarray analysis. We used the residual volume of RNA following high-throughput screening to undertake confirmatory RT-PCR experiments. Due to an insufficient volume of RNA in 1 of the 11 samples of myxomatous tissue, confirmatory RT-PCR was carried out in 10 myxomatous valves (and 11 non-myxomatous valves). Gene expression levels of pro-fibrotic (TGF- $\beta$ 2, BMP and activin membrane-bound inhibitor homolog (*Xenopus laevis*) [BAMBI], salt-inducible kinase [SIK1]), pro-calcific (BMP4, Runt-related transcription factor 2 [Runx2], Wnt9A, Frizzled [FZD] 8, R-spondin 2 (RSPO2), Wnt-inducible signaling pathway protein 1 [WISP1]), cell growth and proliferation-related (Cyclin-dependent kinase inhibitor 1A [CDKN1A], and Cyclin-dependent kinase 4 inhibitor B [CDKN2B]) and immune-related genes (CD14, CD83, Chemokine (C-X3-C motif) receptor 1 [CX3CR1], and Fc fragment of IgG, high affinity Ib, receptor [FCGR1B]) were

measured using TaqMan Gene Expression Assay primers (Life Technologies) and a calibrated Applied Biosystems StepOne Plus unit. Gene expression levels were normalized by hypoxanthine phosphoribosyltransferase 1 (HPRT1), a commonly used housekeeper gene, and expressed using the  $\Delta\Delta C_t$  method. The correlation between microarray and qRT-PCR-determined gene expression within individual patient samples, and corresponding  $R^2$  values, are outlined in Table S2.

Differential gene expression levels of TGF- $\beta$  (TGF- $\beta$ 2, BAMBI, Collagen type I alpha 1 [COL1A1], MMP2), BMP- (BMP4, transducer of erbB2 [TOB2], MSX2, Runx2), Wnt- (Wnt9A, axis-inhibition protein 2 [AXIN2], FZD8, WISP1) and immune-network genes (IL7, CD14, CD83, TLR7) were measured in mitral valve tissue from AngII versus saline-infused C57BL/6 mice. As a negative control and to confirm the absence of significant myocardial contamination in mitral valve tissue isolated from AngII and saline-treated mice, gene expression levels of myocardial specific markers (myosin, light polypeptide 2, regulatory, cardiac, slow [MyI2], and myosin, heavy polypeptide 6, cardiac muscle alpha [Myh6]) were measured in left ventricular and mitral valve tissue. Furthermore, mRNA levels of SIK1, BAMBI, SMURF1, SMURF2, COL1A1, BMP4, Runx2, Wnt9A, WISP1, CD14 and CD83 were measured from MVICs cells receiving *in vitro* treatment with saline, BMP4 or TGF- $\beta$ 2. Guided by results of our microarray analyses, genes for evaluation in cultured MVICs were selected in a manner that would collectively allow the full spectrum of signaling pathways to be probed – from ligand, to intracellular modulators/inhibitors and finally to target genes. In turn this approach would enable commentary on the extent by which BMP4 and/or TGF- $\beta$ 2 treatment is capable of activating various signaling cascades. Separate human-specific and mouse-specific primers were used in the above experiments (Table S1).

### **Western Blotting**

To probe for evidence of canonical TGF- $\beta$ , BMP and Wnt signaling in cultured MVICs, western blotting was performed for SMAD2, Phospho-SMAD2 (pSMAD2), SMAD1, Phospho-SMAD1/SMAD5/SMAD8 (pSMAD1/5/8), and  $\beta$ -catenin, respectively, following 20 minutes and

24 hour treatments with recombinant TGF- $\beta$ 2, BMP4 or control saline. To evaluate immune cell activation/recruitment, protein levels of CD14 were measured. Protein was obtained from lysed mitral valve cells. Gel electrophoresis was carried out using Bis-Tris gels (Invitrogen), and subsequently transferred to nitrocellulose membranes. Membrane incubation with anti-SMAD2 (Cell Signaling), anti-pSMAD2 (Cell Signaling), anti-SMAD1 (Cell Signaling), anti-pSMAD1/5/8 (Cell Signaling), anti- $\beta$ -catenin (Cell Signaling) and anti-CD14 (Abcam Inc) antibodies (all monoclonal) was performed at dilutions of 1:1000 and for 18 h at 4°C. Thereafter, membranes were incubated with goat anti-rabbit/mouse HRP-conjugated secondary antibody for 1.5 h at room temperature (1:7500, Fisher Scientific). Following the addition of chemiluminescent substrate (Thermo Scientific), bands were detected by densitometric analysis performed using digital imaging techniques (Fluorochem M) and quantified using Cell Biosystems software. The density of pSMAD2 and pSMAD1/5/8 protein bands was normalized to unphosphorylated SMAD2 and SMAD1, respectively. Density of all other protein bands was normalized to the corresponding HPRT band from the same sample. Quantitation was carried out using AlphaView software (ProteinSimple™).

### **Immunohistochemistry**

To confirm our microarray finding of differential levels of 1) immune cell infiltration and 2) activation of BMP signaling in human myxomatous mitral valves, immunohistochemical staining was performed with anti-CD14 and anti-pSMAD1/5/8 antibodies, respectively. To probe for evidence of increased cellular proliferation in MMVD, immunostaining with cellular proliferation markers anti-KI-67 and anti-proliferation cell nuclear antigen (PCNA) were performed. To evaluate the impact of AngII versus saline infusion on TGF- $\beta$ , BMP and Wnt signaling, as well as cellular proliferation, immunohistochemical staining for pSMAD2, pSMAD1/5/8,  $\beta$ -catenin, and KI-67 was carried out in mitral valve sections of treated mice.

Both human and murine tissue samples for immunohistochemical study were frozen in OCT compound and serial 10 $\mu$ m thick transverse sections through the mitral valves were obtained using a cryostat and mounted on glass slides<sup>2</sup>. MV sections were fixed with 2%

paraformaldehyde (1:1 of 4% paraformaldehyde:Phosphate-buffered saline) for 10 minutes, All samples were blocked in donkey serum (Invitrogen) at room temperature for 1 hour. Thereafter samples were incubated overnight at 4°C; separately in either rabbit anti-CD14 antibodies (Abcam Inc) at a 1:500 dilution<sup>6</sup>, a 1:50 dilution of rabbit anti-pSMAD2 (Cell Signaling), 1:100 dilution of rabbit anti-pSMAD1/5/8 antibody (Cell Signaling)<sup>7</sup>, a 1:1000 dilution of rabbit anti-KI-67 antibody (Cell Signaling)<sup>8</sup>, or a 1:1000 dilution of mouse anti-PCNA antibody (Abcam Inc)<sup>9</sup>. All antibodies were diluted in Tris-buffer (TBS). Samples were then incubated at room temperature for 1 hour in donkey anti-rabbit Alexa Fluor 647 secondary antibody (Life Technologies). All primary antibodies were monoclonal. Thereafter, slides were either 1) incubated for 5 minutes in SYTO-16 Alexa Fluor 488 nuclear counterstain (Life Technologies) followed by application of an anti-fade reagent (ProLong® Gold, Life Technologies), or alternatively 2) ProLong® Gold antifade reagent with DAPI nuclear counterstain was applied directly to the slides. Negative controls (3 non-myxomatous, 7 myxomatous) for all antibodies were achieved by substituting TBS in place of primary antibody. An LSM780 confocal laser microscope (Carl-Zeiss, Jena, Germany) was used to obtain images at 20x magnification (Excitation 488nm, Emission 647 nm). Image processing was performed using Image J software (version 1.42q; National Institutes of Health, Bethesda). Images were thresholded so that only the mean pixel intensity for punctate, positive staining was measured in mitral valves (i.e. myxomatous vs non-myxomatous human mitral valves, AngII vs Saline-infused murine mitral valves). The difference between these values in groups being compared was used as a measure of relative antibody staining (i.e., relative KI-67 staining).

### **Immunocytochemistry**

To examine the consequence of *in vitro* treatment with saline, BMP4 and TGF- $\beta$ 2 on canonical TGF- $\beta$ , BMP and Wnt signaling and immune activation in MVICs, immunocytochemical staining was performed on cultured murine cells. Staining with anti-pSMAD2 (Cell Signaling), anti-pSMAD1/5/8 (Cell Signaling), anti- $\beta$ -catenin (Cell Signaling) and anti-CD14 (Abcam Inc) antibodies was carried out using standard methods<sup>3</sup>.

Dissociated cells from cultured murine MVICs were plated on glass cover-slips and fixed with 2% paraformaldehyde for 30 minutes. Thereafter they were blocked with donkey serum at room temperature for 1 hour. Cells were then incubated overnight with rabbit anti-pSMAD2 (1:50) , rabbit anti-pSMAD1/5/8 (1:100), rabbit anti- $\beta$ -catenin (Cell Signaling; 1:100) and rabbit anti-CD14 (Abcam Inc; 1:500). Primary antibodies were diluted in TBS. Cells were then incubated at room temperature for 1 hour in donkey anti-rabbit Alexa Fluor 647 secondary antibody (Life Technologies). Finally, after the application of anti-fade reagent Prolong® Gold with DAPI nuclear counterstain, the cover slip harboring the cells was mounted on a glass slide for imaging.

All images were obtained using an LSM780 confocal laser microscope (Carl-Zeiss, Jena, Germany) at 20x or 100x magnification (Excitation 488nm, Emission 647 nm). Images were processed using Image J software (version 1.42q; National Institutes of Health, Bethesda, MD).

### **Modeling Signaling Interactions**

In order to examine potential interactions between signaling pathways that were differentially regulated in human MMVD (i.e. TGF- $\beta$  pathway, BMP pathway, Wnt/ $\beta$ -catenin pathway, and Immune pathway), we used the PathwayLinker web resource ([www.pathwaylinker.org](http://www.pathwaylinker.org))<sup>10</sup>.

PathwayLinker is a service that identifies potential interactions between proteins using data from HPRD, BioGRID, and STRING databases, and places “interactors” into signaling pathways using KEGG, Reactome and Signalink pathway resources. The network was induced using a list of genes identified by our microarray analyses as differentially expressed in myxomatous versus non-myxomatous valves, and that are depicted in the heat maps of figures 1 – 4 (i.e. TGF- $\beta$ , BMP, Wnt/ $\beta$ -catenin and immune signaling genes): TGF $\beta$ -2, FGF9, HGF, BAMBI, SIK1, MYC, TGIF1, JUN, FOS, DAB2, CREB5, COL1A1, MMP2, MMP16, FN1, FAP, FSCN1, BMP4, TOB2, HEY1, WISP1, RUKNX2, WNT9A, NDP, FZD8, RSPO2, SFRP2, TLE1, HBP1, TCF4, CD14, CD28, CD30, CD39, CD63, CD69, CD71, CD73, CD83, CD93, TLR3, TLR7, FCGR1A, CX3CR1, CX3CL1, IL6 and IL7. Specifically, we entered the list of genes that was differentially



expressed but did not account for magnitude or directionality of the changes.

## **Statistical Analyses**

### ***Whole Genome Expression Microarray***

Gene expression levels were measured using Affymetrix Human Genome U133 Plus 2.0 expression arrays (Affymetrix, Santa Clara, California). Differential gene expression between myxomatous and non-myxomatous valves was identified by linear modeling using t-test. Please see the statistics section below for further details of data processing and analysis using for the whole genome expression microarrays. Significance thresholds were established a priori as 1) a minimum 1.5 fold-change in gene expression, and 2) a p-value < 0.05. Ingenuity (Ingenuity Systems Inc.) Pathway Analysis systems were used to identify differentially regulated canonical signaling pathways.

### ***Pre-processing and normalization of microarray data.***

Pre-processing and normalization of microarray data was done using an in-house built pipeline MAPP. MAPP pre-processes raw intensity files from microarray experiments using Robust Multi-array Analysis (RMA) background subtraction and Loess normalization. The expression values of each probe set were summarized from multiple probe pairs using median polish method. The absent, marginal, and present calls for each probe set were calculated by dChip using the MAS 5.0 algorithm (Affymetrix, Santa Clara, CA).

### ***Differential gene expression analysis.***

Transcripts with “absent” calls in all compared samples were excluded from further analysis. We also considered transcripts whose expression in all samples fell below the 50<sup>th</sup> percentile of all expression values to be not expressed, and were thus excluded. Significantly changed genes obtained from t-testing were prioritized by cut-off values of  $p < 0.05$  and a fold-change  $> 1.5$  (to interpret statistical and biological significance, respectively).

Secondary analysis to adjust for multiple comparisons was carried out by applying the statistical approach of false discovery rate (FDR). As a result, adjusted p-value, called the q-value, was obtained for individual probes of the whole genome expression microarray. The commonly used significance thresholds of  $q < 0.05$  and  $q < 0.1$  were applied to control the number of false discoveries.

#### Pathway analysis.

Pathway analysis was conducted for these changed genes to identify significantly enriched biological processes. Metacore (Thomson Reuters) and Ingenuity (Ingenuity Systems, Inc.) analysis packages were used to identify canonical pathways and functional gene groups.

#### ***Functional Validation of Targeted Gene Expression***

For qRT-PCR experiments carried out on myxomatous and non-myxomatous human mitral valves, relative change in gene expression was analyzed using the student's *t*-test. Quantified results of immunohistochemical staining were also compared between groups using the student's *t*-test.

#### ***Comparison of Microarray and qRT-PCR Results***

Linear regression analyses were utilized to compare fold-changes in gene expression within individual patient samples, as measured by microarray versus qRT-PCR analyses. This relationship was further summarized by a coefficient of determination ( $R^2$ ) for each gene analyzed (table S2).

#### ***Analysis of In Vivo Angiotensin-II Experiments***

Relative gene expression (qRT-PCR) in mitral valves of saline versus AngII treated C57B/6J was compared using the student's *t*-test. Quantitation of Immunohistochemical staining results were also compared between groups by the student's *t*-test.

#### ***Cell Culture Analysis***

For cell culture experiments evaluating the relative change in gene (qRT-PCR) and protein (western blot) expression following TGF- $\beta$ 2 or BMP4 treatment versus control saline, Dunnett's test for multiple comparisons was used to compare means. The cut-off used for statistical significance was  $p < 0.05$ .

## REFERENCES

1. Hinton RB, Alfieri CM, Witt SA, Glascock BJ, Khoury PR, Benson DW, et al. Mouse heart valve structure and function: echocardiographic and morphometric analyses from the fetus through the aged adult. *Am J Physiol Hear Circ Physiol*. 2008;294:H2480–H2488.
2. Miller JD, Weiss RM, Serrano KM, Li RMB, Christopher J, Zimmerman K, et al. Lowering Plasma Cholesterol Levels Halts Progression of Aortic Valve Disease in Mice. *Circulation*. 2009;119:2693–2701.
3. Miller JD, Weiss RM, Serrano KM, Castaneda LE, Brooks RM, Zimmerman K, et al. Evidence for active regulation of pro-osteogenic signaling in advanced aortic valve disease. *Arter Thromb Vasc Biol* 2010;30:2482–2486.
4. Barrick CJ, Roberts RB, Rojas M, Rajamannan NM, Suitt CB, Brien KDO, et al. Reduced EGFR causes abnormal valvular differentiation leading to calcific aortic stenosis and left ventricular hypertrophy in C57BL/6J but not 129S1/SvImJ mice. *Am J Physiol Hear Circ Physiol*. 2009;297:65–75.
5. Berry CJ, Miller JD, McGroary K, Thedens DR, Young SG, Heistad DD, et al. Biventricular adaptation to volume overload in mice with aortic regurgitation. *J Cardiovasc Magn Reson*. 2009;11:27–32.
6. Kayamori K, Sakamoto K, Nakashima T, Takayanagi H, Morita K, Omura K, et al. Roles of Interleukin-6 and Parathyroid Hormone-Related Peptide in Osteoclast Formation Associated with Oral Cancers: Significance of Interleukin-6 Synthesized by Stromal Cells in Response to Cancer Cells. *Am J Pathol*. 2010;176:968–980.
7. Ahn K, Mishina Y, Hanks MC, Behringer RR, Crenshaw III B. BMPR-IA signaling is required for the formation of the apical ectodermal ridge and dorsal-ventral patterning of the limb. *Development*. 2001;4461:4449–4461.

8. Kim J, Wong PKY. Loss of ATM impairs proliferation of neural stem cells through oxidative stress-mediated p38 MAPK signaling. *Stem Cells*. 2009;27:1987–1998.
9. Takahashi S, Nakamura H, Seki M, Shiraishi Y, Yamamoto M, Furuuchi M, et al. Reversal of elastase-induced pulmonary emphysema and promotion of alveolar epithelial cell proliferation by simvastatin in mice. *Am J Physiol Lung Cell Mol Physiol*. 2008;:882–890.
10. Farkas IJ, Szántó-Várnagy A, Korcsmáros T. Linking proteins to signaling pathways for experiment design and evaluation. *PLoS One*. 2012;7:e36202.

## SUPPLEMENTAL FIGURES

Figure S1.

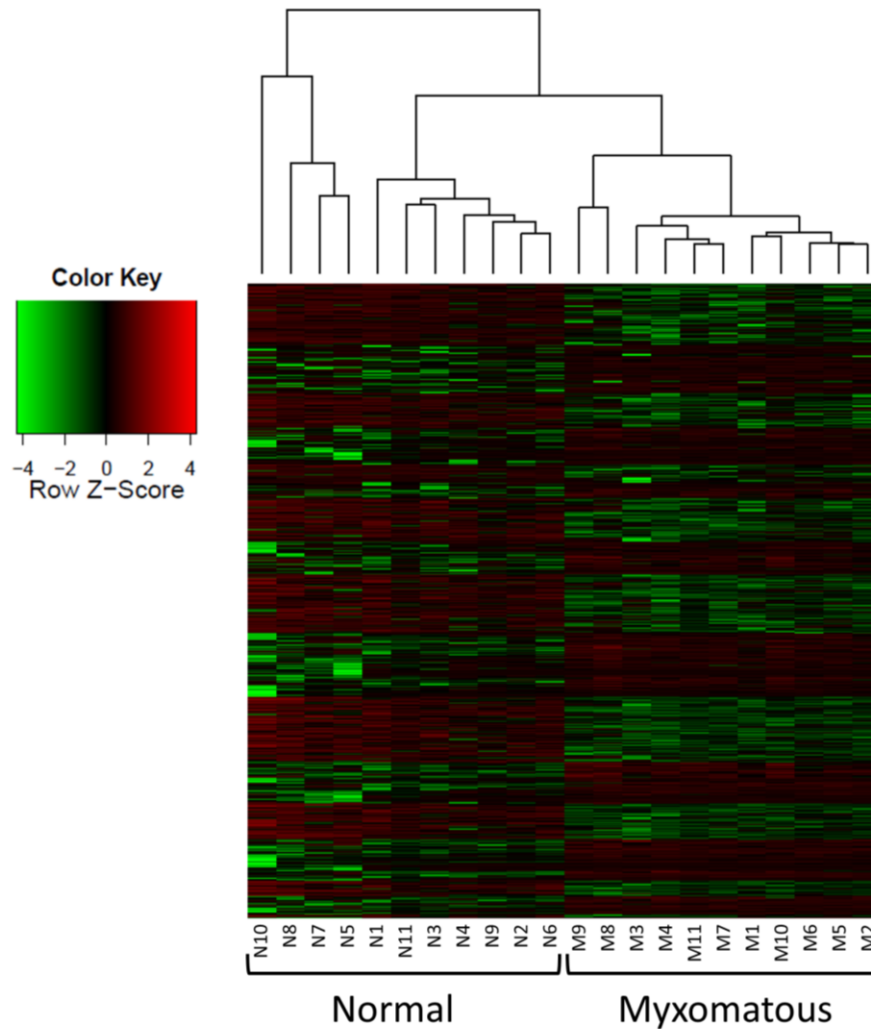

**Figure S1. Heat map and hierarchical cluster analysis of differentially expressed genes in human mitral valves.** Non-myxomatous and myxomatous human mitral valve samples cluster together within their respective groups. M = myxomatous; N = normal/non-myxomatous samples. For clarity, non-myxomatous control valves are referred to as “normal”.

**Figure S2.**

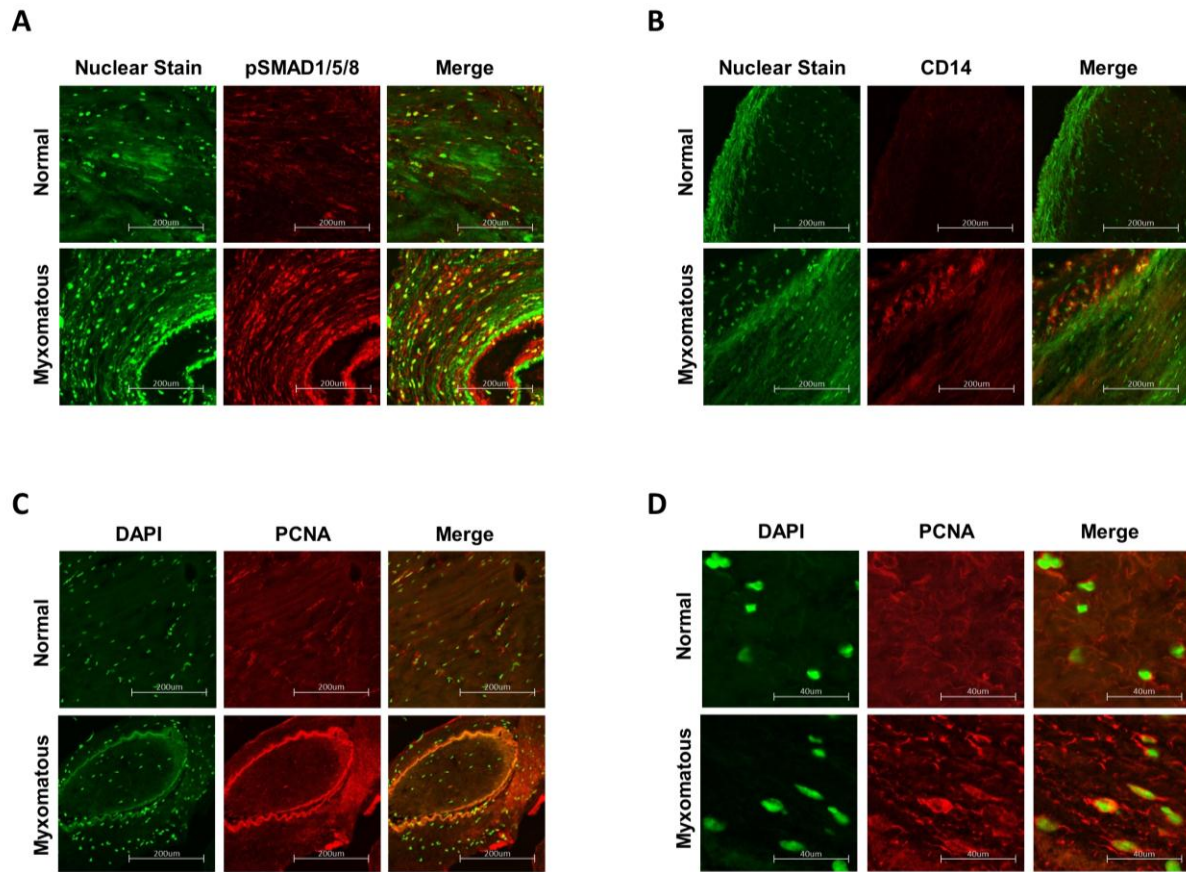

**Figure S2. Immunohistochemical analysis of human mitral valve tissue.**

Immunofluorescence of A) pSMAD1/5/8 (20x magnification), B) CD14 (20x magnification), and C-D) PCNA (20x and 100x magnification respectively) was increased in myxomatous mitral valve tissue compared to non-myxomatous tissue (representative images from 11 non-myxomatous and 11 myxomatous mitral valves). For clarity, non-myxomatous control valves are referred to as “normal”. CD = Cluster of differentiation; PCNA = Proliferating cell nuclear antigen; SMAD = SMA mothers against decapentaplegic.

**Figure S3.**

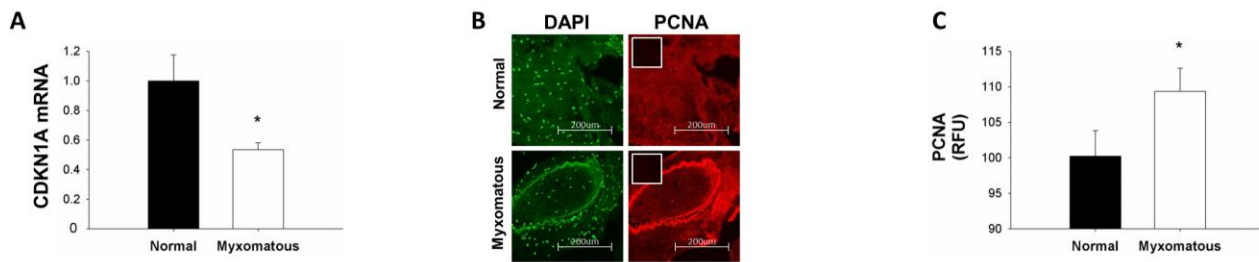

**Figure S3. Evidence for increased cellular proliferation in MMVD.** A) Gene expression (qRT-PCR) of CDKN1A was reduced in myxomatous versus non-myxomatous human mitral valves. qRT-PCR experiments were performed on the same samples of human mitral valve tissue used for microarray analyses. B) Immunofluorescence of PCNA (20x magnification; inset negative control) was increased in human MMVD tissue (20x magnification; negative controls inset) (n = 11 non-myxomatous valves, n = 10 myxomatous valves). C) Quantitation of PCNA immunofluorescence (\* = p<0.05). For clarity, non-myxomatous control valves are referred to as “normal”. CDKN1A = Cyclin-dependent kinase 1A; PCNA = Proliferation cell nuclear antigen; RFU = Relative fluorescence units.



**Figure S4.**

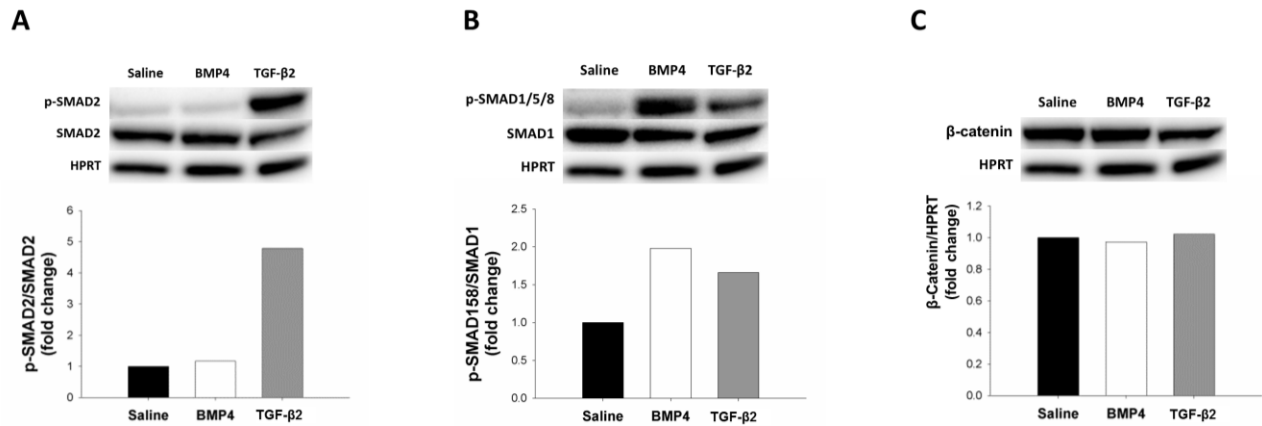

**Figure S4. Effects of *in vitro* treatment with BMP4 and TGF-β2 after 20 minutes on protein levels in human mitral valve interstitial cells.** A) pSMAD2 protein levels by western blot analysis were increased by TGF-β2 but unaltered by BMP4. B) pSMAD1/5/8 protein expression appeared increased after 20 minutes of BMP4 and TGF-β2 treatment. C) β-catenin levels were unchanged by either treatment condition. BMP = Bone morphogenetic protein; SMAD (SMA mothers against decapentaplegic); TGF-β = Transforming growth factor β.

**Figure S5.**

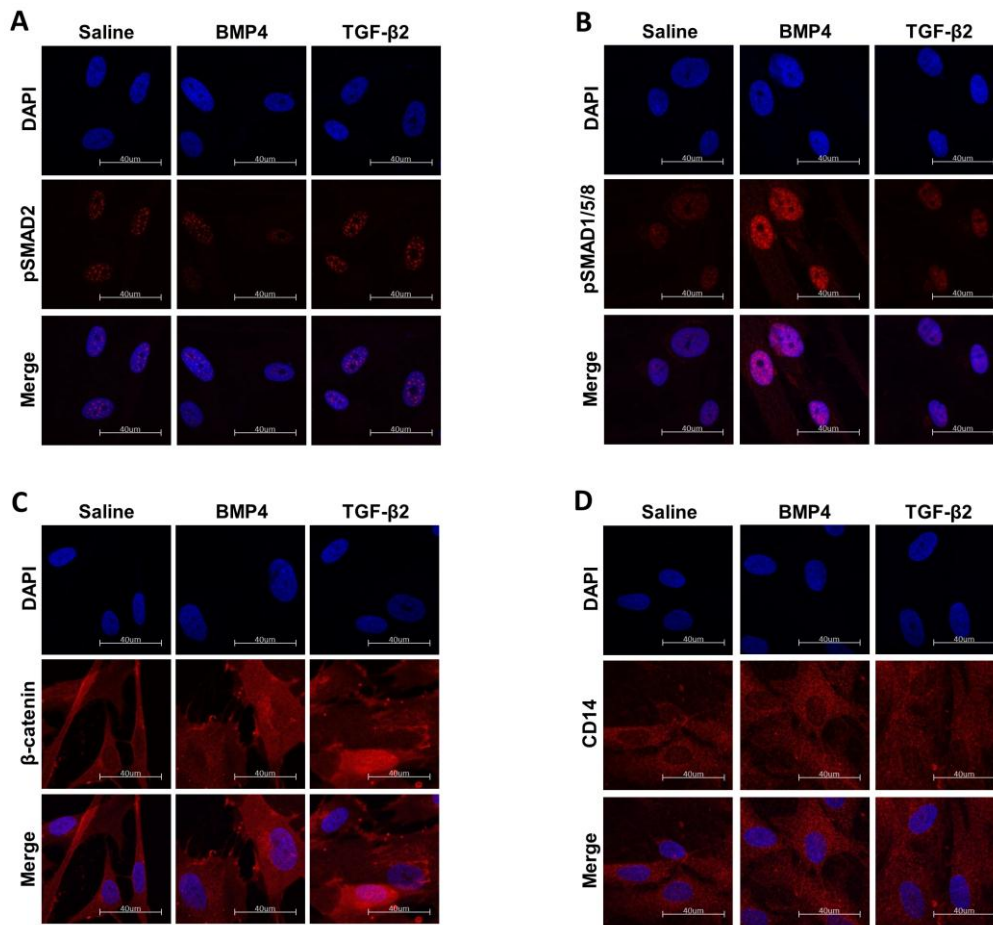

**Figure S5. Immunocytochemical analysis of human mitral valve interstitial cells after 24 hours of treatment.** A) Immunocytochemistry could not demonstrate a change in pSMAD2 fluorescence in BMP4 or TGF- $\beta$ 2 treated human MVICs (100x magnification). B) Staining for pSMAD1/5/8 was increased in BMP4 treated cells but was unchanged by TGF- $\beta$ 2 (100x magnification). C) Immunocytochemistry demonstrated increased nuclear  $\beta$ -catenin in human MVICs with TGF- $\beta$ 2 but not BMP4 treatment (100x magnification). D) CD14 was unchanged by BMP4 or TGF- $\beta$ 2 treatment (100x magnification). BMP4 = Bone morphogenetic protein 4; CD = cluster of differentiation; SMAD = SMA mothers against decapentaplegic; TGF- $\beta$  = Transforming growth factor-beta.

**Figure S6.**

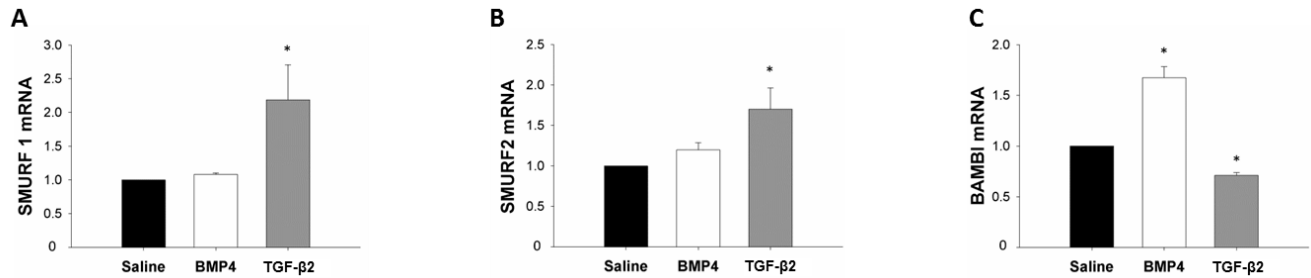

**Figure S6. Effects of *in vitro* treatment with BMP4 and TGF-β2 for 24 hours on inhibitors of TGF-β signalling in human mitral valve interstitial cells.** Gene expression (RT-PCR) of intracellular inhibitors of canonical TGF-β signalling SMURF1 (A) and SMURF2 (B) was increased in human mitral valve interstitial cells following exogenous TGF-β2, but was unchanged by BMP4 treatment. mRNA levels of BAMBI (C) were increased by BMP4 but decreased by TGF-β2. (\* =  $p < 0.05$ ). BAMBI = BMP and activin membrane-bound inhibitor homolog (*Xenopus laevis*); BMP = Bone morphogenetic protein; SMURF = SMAD specific E3 ubiquitin protein ligase; TGF-β = Transforming growth factor-β.

**Figure S7.**

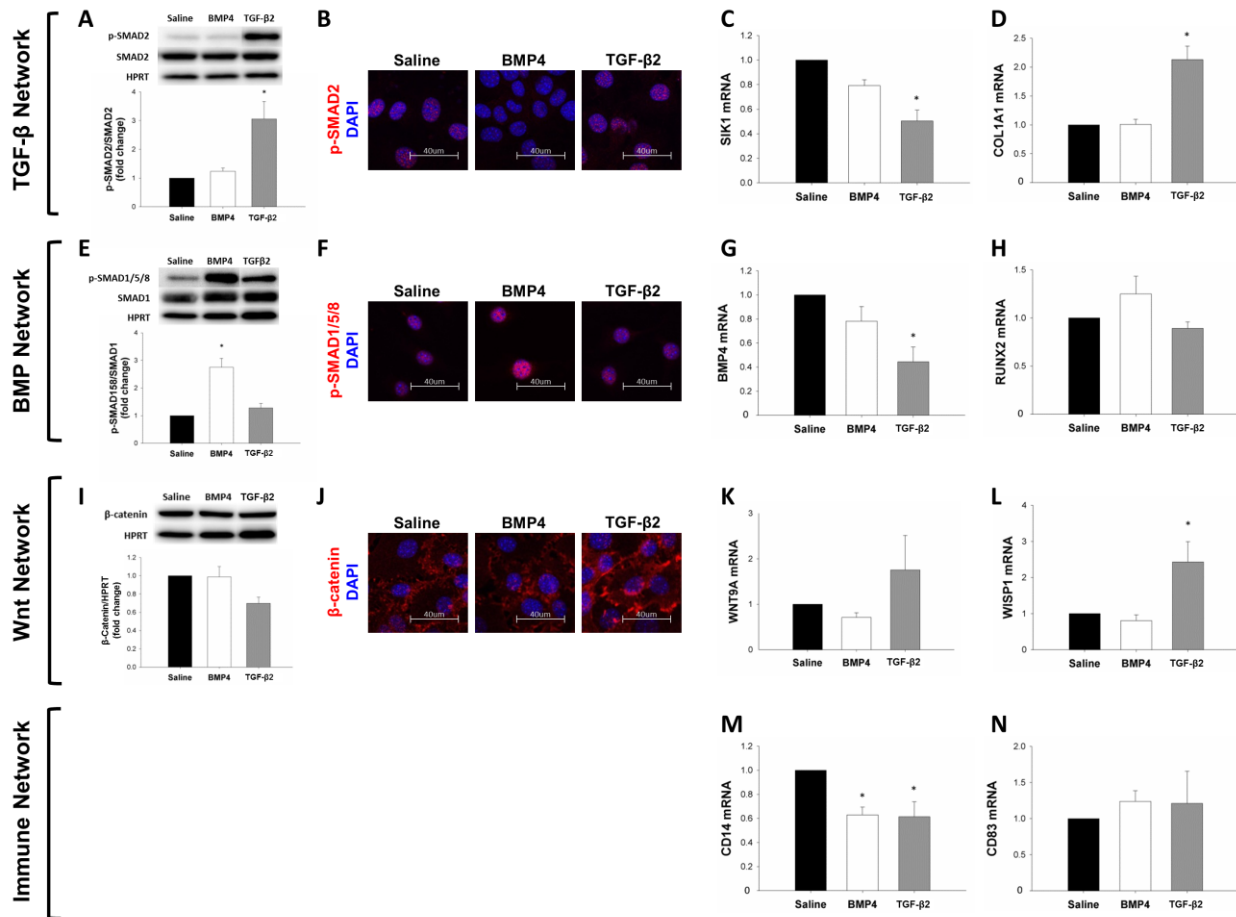

**Figure S7. Effects of *in vitro* treatment with BMP4 and TGF-β2 after 24 hours on TGF-β (A-D), BMP (E-H), Wnt/β-catenin (I-L) and immune-signaling (M-N) in murine mitral valve interstitial cells.** pSMAD2 protein levels by western blot (A) were increased by TGF-β2 treatment but unchanged by BMP4 (24hr treatment). Immunocytochemistry (B) did not demonstrate a change in pSMAD2 fluorescence (100x magnification) with either treatment condition. SIK1 (C) mRNA expression was reduced and COL1A1 (D) levels increased by TGF-β2 treatment, but both were unchanged following BMP4 treatment. pSMAD1/5/8 protein levels by western blot (E) and immunocytochemistry (F) (100x magnification) were increased by BMP4 treatment, but unaltered by TGF-β2 (24hr treatment). While BMP4 expression (G) was unaltered by exogenous BMP4 treatment, it was reduced by TGF-β2. Runx2 expression (H) was

unchanged by either treatment condition. On western blot analysis, total  $\beta$ -catenin (I) was unaltered following BMP4 or TGF- $\beta$ 2 treatment (24hr treatment). Immunocytochemistry (J) (100x magnification) showed increased nuclear  $\beta$ -catenin with TGF- $\beta$ 2 treatment. Gene expression of Wnt9A (K) was not significantly changed, whereas WISP1 (L) mRNA levels increased with TGF- $\beta$ 2 treatment. Gene expression of CD14 by RT-PCR (M) was reduced by BMP4 and TGF- $\beta$ 2, but CD83 (N) was unchanged by either treatment condition (\* =  $p < 0.05$ ). BMP = Bone morphogenetic protein; CD = Cluster of differentiation; Col1A1 = collagen, type I, alpha I; Runx2 = Runt-related transcription factor 2; SIK1 = Salt-inducible kinase 1; SMAD (SMA mothers against decapentaplegic); TGF- $\beta$  = Transforming growth factor  $\beta$ ; WISP1 = Wnt-inducible signaling pathway protein 1; Wnt9A = Wingless-type MMTV integration site family.

**Figure S8.**

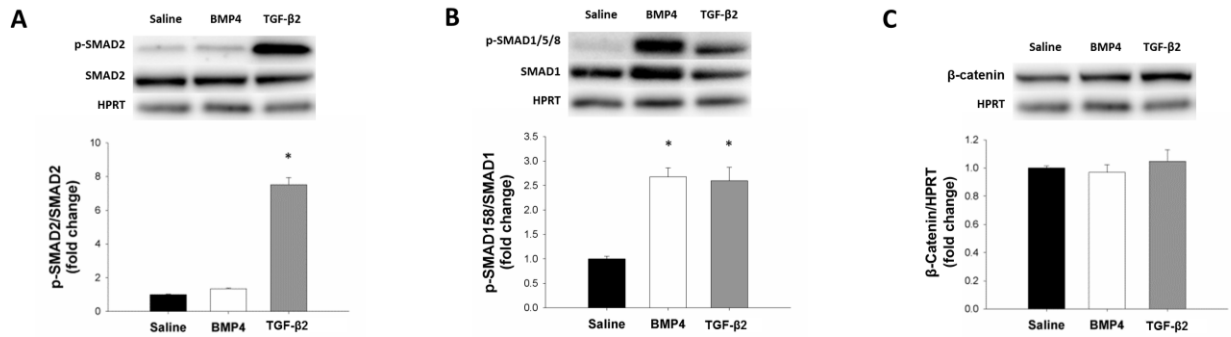

**Figure S8. Effects of *in vitro* treatment with BMP4 and TGF-β2 after 20 minutes on protein expression in murine mitral valve interstitial cells.** A) Exogenous TGF-β2 treatment increased pSMAD 2 levels by western blot analysis, whereas BMP4 was not associated with a change. B) Both BMP4 and TGF-β2 induced increased pSMAD1/5/8 levels after 20 minutes. C) β-catenin protein levels were unaltered by either treatment. (\* =  $p < 0.05$ ) BMP = Bone morphogenetic protein; SMAD (SMA mothers against decapentaplegic); TGF-β = Transforming growth factor β.

**Figure S9.**

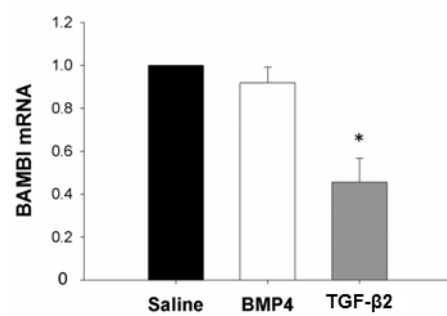

**Figure S9. Effects of *in vitro* treatment with BMP4 and TGF-β2 after 24 hours on BAMBI expression in mouse mitral valve interstitial cells.** Gene expression (RT-PCR) of BAMBI was unchanged in mouse mitral valve interstitial cells following exogenous BMP4, but decreased by TGF-β2 treatment (\*=  $p < 0.05$ ). BAMBI = BMP and activin membrane-bound inhibitor homolog (*Xenopus laevis*); BMP = Bone morphogenetic protein; TGF-β = Transforming growth factor-β.

**Figure S10.**

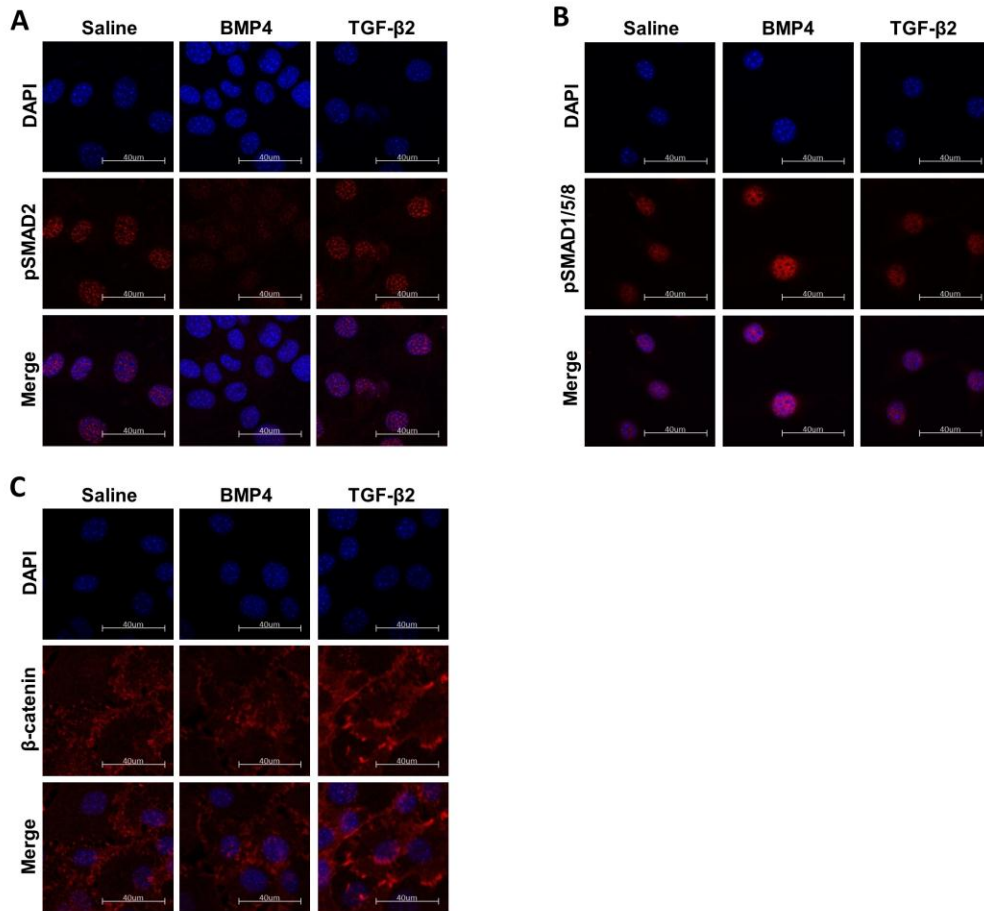

**Figure S10. Immunocytochemical analysis of mouse mitral valve interstitial cells after 24 hours of treatment.** A) Immunocytochemistry did not show a change in pSMAD2 fluorescence in BMP4 or TGF- $\beta$ 2 treated mouse MVICs (100x magnification). B) Staining for pSMAD1/5/8 was increased in BMP4 treated cells but was not changed by TGF- $\beta$ 2 (100x magnification). C) Immunocytochemistry demonstrated increased nuclear  $\beta$ -catenin in mouse MVICs with TGF- $\beta$ 2 but not BMP4 treatment (100x magnification). BMP4 = Bone morphogenetic protein 4; SMAD = SMA mothers against decapentaplegic; TGF- $\beta$  = Transforming growth factor-beta.



**Figure S11.**

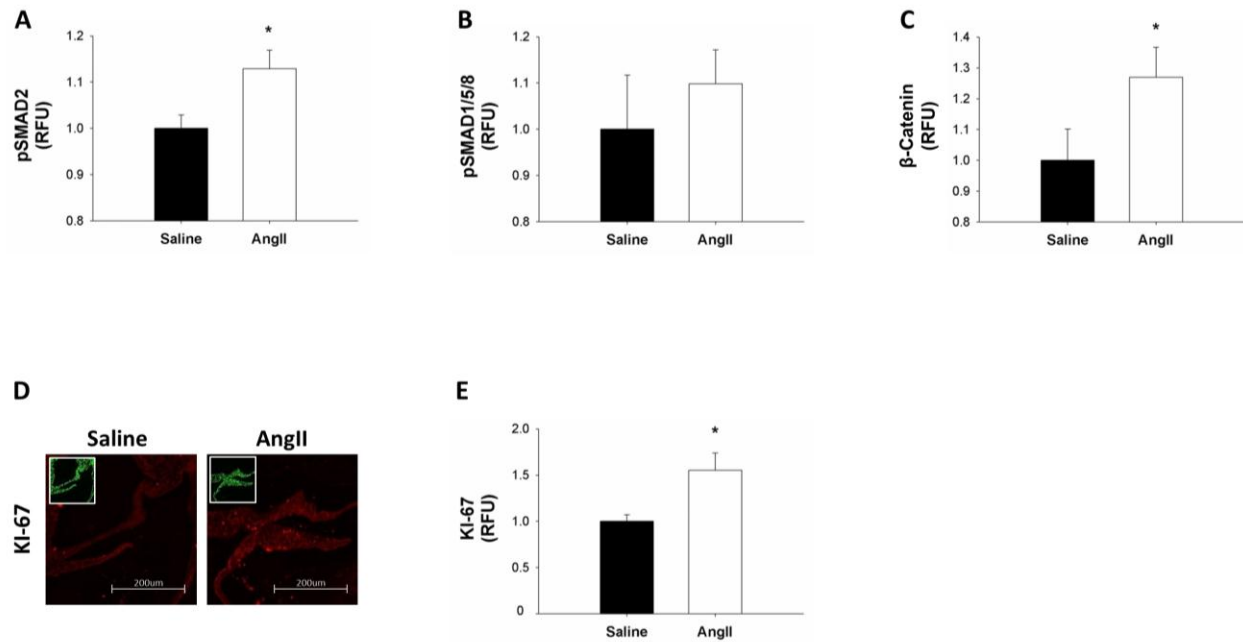

**Figure S11. Effects of AngII infusion on canonical TGF- $\beta$ -, BMP- and Wnt/ $\beta$ -catenin signaling and cellular proliferation in murine mitral valves.** Quantitation of pSMAD2 (A), pSMAD1/5/8 (B) and  $\beta$ -catenin (C) immunofluorescence in mitral valves of AngII and saline-infused mice. Immunofluorescence (20x magnification; inset DAPI nuclear stain) of the proliferation marker KI-67 (D-E) was increased in AngII-treated mice. AngII = Angiotensin II; RFU = Relative fluorescence units; SMAD (SMA mothers against decapentaplegic).

**Figure S12.**

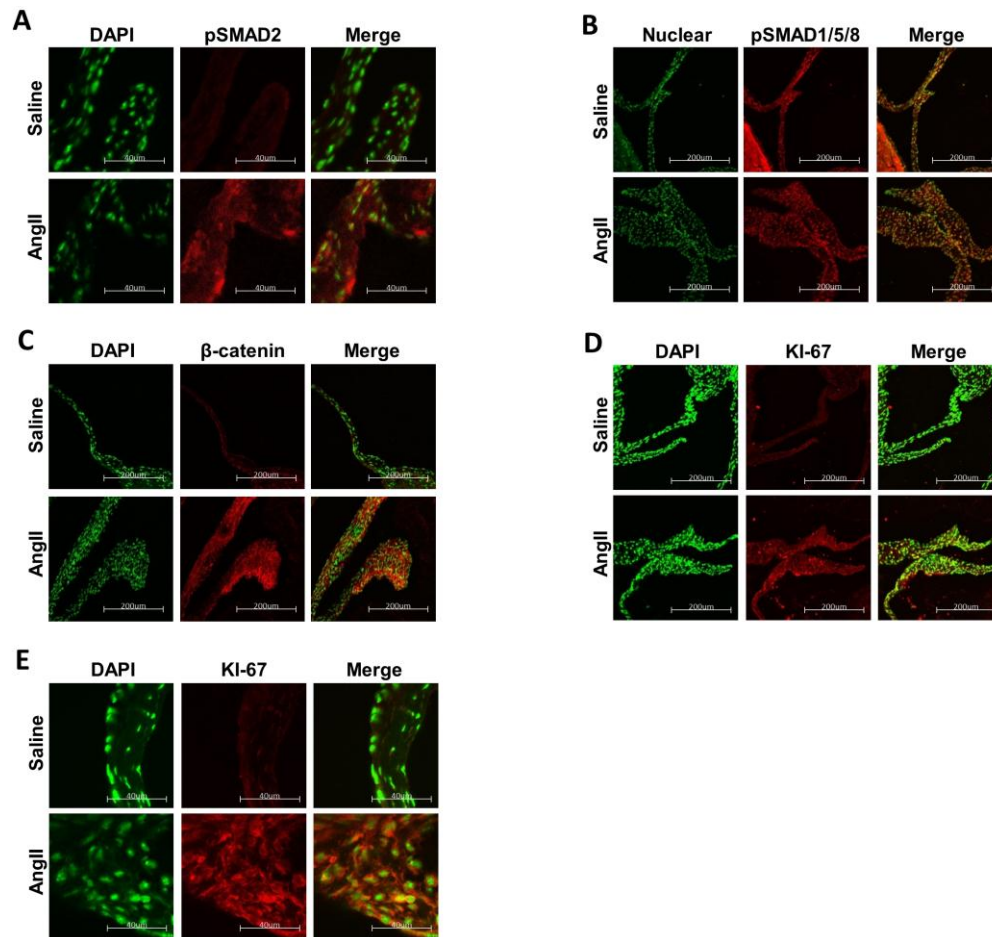

**Figure S12. Immunohistochemical analysis of Saline and AngII infused murine mitral valve tissue.** Immunofluorescence of A) pSMAD2 (100x magnification) was increased in AngII versus Saline infused mouse mitral valves. B) Staining for pSMAD1/5/8 (20x magnification) was unchanged between groups. Immunofluorescence of C)  $\beta$ -catenin (20x magnification) and D-E) the proliferation marker KI-67 (20x and 100x magnification respectively) was increased in mitral valves of AngII-infused mice (representative images from 8 AngII and 8 Saline-infused mice). AngII = Angiotensin II; SMAD = SMA mothers against decapentaplegic.

**Figure S13.**

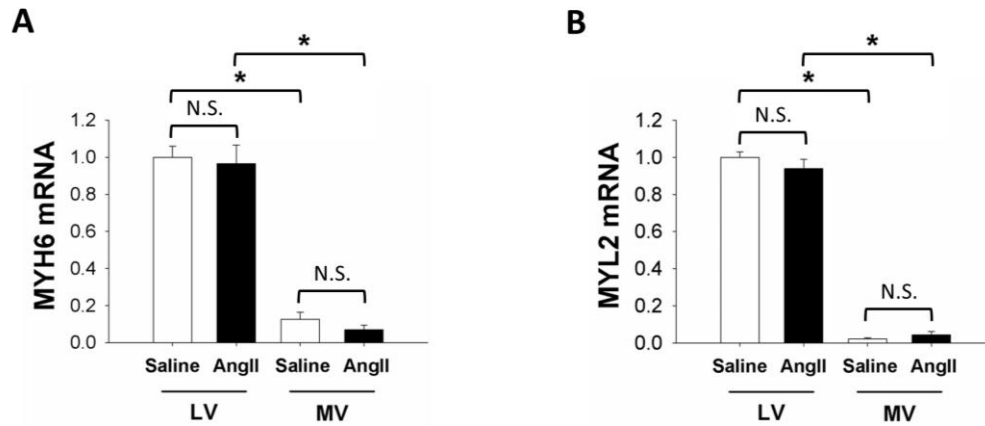

**Figure S13. Gene expression levels of myocardium-specific markers in LV and MV tissue of AngII and Saline-infused mice.** mRNA levels of MYH6 (A) and MYL2 (B) were significantly greater in LV as compared to MV tissue, irrespective of treatment group. Gene expression levels were comparable between Saline and AngII treated mice within the LV and MV. AngII, angiotensin II; LV, left ventricle; MV, mitral valve; MYL2, myosin light polypeptide 2; MYH6, myosin heavy polypeptide 6; NS, not significant.

**Figure S14.**

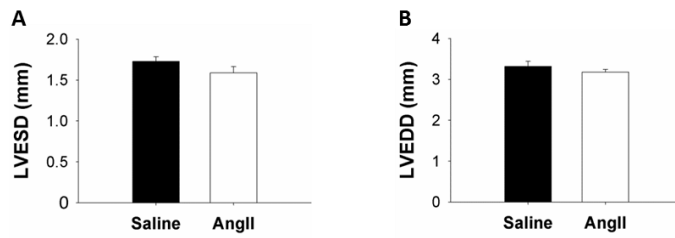

**Figure S14. Echocardiographic evaluation of LV dimensions in murine mitral valves.** LV end-systolic (A) and end-diastolic (B) dimensions were comparable ( $p=NS$ ) between AngII and Saline-infused mice on Day 14 post-minipump implantation. AngII = angiotensin II; EDD (end-diastolic dimension); ESD (end-systolic dimension); LV = left ventricle.

## SUPPLEMENTAL TABLES

**Table S1. Human and Murine-Specific Gene Expression Primers Used for qRT-PCR Experiments**

| Gene   | Human Primer  | Murine Primer |
|--------|---------------|---------------|
| AXIN2  |               | Mm00443610_m1 |
| BAMBI  | Hs03044164_m1 | Mm03053974_s1 |
| BMP4   | Hs03676628_s1 | Mm00432087_m1 |
| CD14   | Hs00259040_s1 | Mm00438094_g1 |
| CD83   | Hs00188486_m1 | Mm00486868_m1 |
| CDKN1A | Hs00355782_m1 |               |
| CDKN2B | Hs00793225_m1 |               |
| COL1A1 | Hs00164004_m1 | Mm00801666_g1 |
| CTGF   |               | Mm01192932_g1 |
| CX3CR1 | Hs01922583_s1 |               |
| FBN1   | Hs00171191_m1 |               |
| FCGR1B | Hs00417598_m1 |               |
| FZD8   | Hs00259040_s1 | Mm01234717_s1 |
| IL-7   |               | Mm01295803_m1 |
| MMP2   |               | Mm00439498_m1 |
| MSX2   |               | Mm00442992_m1 |
| MYL2   |               | Mm00440384_m1 |
| MYH6   |               | Mm00440359_m1 |
| RSPO2  | Hs00379983_m1 |               |
| RUNX2  | Hs00231692_m1 | Mm00501584_m1 |
| SMURF1 | Hs00905759_m1 |               |
| SMURF2 | Hs00224203_m1 |               |
| SIK1   | Hs00545020_m1 | Mm00440317_m1 |
| TGFB2  | Hs00234244_m1 | Mm00436955_m1 |
| TLR7   |               | Mm00446590_m1 |
| TOB2   |               | Mm00451524_s1 |
| WNT9A  | Hs00231692_m1 | Mm00460518_m1 |
| WISP1  | Hs04234730_m1 | Mm01234717_s1 |

All primers were TaqMan Gene Expression Assay primers (Life Technologies)

**Table S2. Differential Gene Expression in Myxomatous vs Non-Myxomatous Mitral Valves: By Microarray and qRT-PCR Analyses**

| Gene   | FC         | FC      | P-value* | R <sup>2</sup> |
|--------|------------|---------|----------|----------------|
|        | Microarray | qRT-PCR |          |                |
| SIK1   | 0.01       | 0.05    | <0.001   | 0.85           |
| CDKN1A | 0.51       | 0.53    | <0.001   | 0.86           |
| BAMBI  | 0.57       | 0.57    | <0.001   | 0.74           |
| WNT9A  | 1.93       | 2.44    | 0.038    | 0.21           |
| BMP4   | 1.96       | 1.94    | 0.027    | 0.23           |
| FBN1   | 2.05       | 1.73    | <0.001   | 0.63           |
| FZD8   | 2.26       | 1.42    | <0.001   | 0.51           |
| TGFB2  | 2.42       | 2.00    | <0.001   | 0.54           |
| RUNX2  | 2.42       | 1.81    | <0.001   | 0.74           |
| FCGR1B | 3.11       | 1.62    | <0.001   | 0.57           |
| CD83   | 3.72       | 2.23    | <0.001   | 0.57           |
| CDKN2B | 4.15       | 2.29    | 0.001    | 0.43           |
| WISP1  | 4.24       | 3.81    | <0.001   | 0.90           |
| CD14   | 4.34       | 4.17    | <0.001   | 0.91           |
| CX3CR1 | 7.47       | 3.71    | <0.001   | 0.87           |
| RSPO2  | 12.75      | 4.51    | <0.001   | 0.80           |

\* The p-value of the slope as determined by linear regression analyses. A p-value <0.05 indicates a significant correlation between the fold-change in gene expression measured by microarray analyses as compared to qRT-PCR. The correlation is significant for all genes, many of which had strong R<sup>2</sup> values.

**Table S3. Non-Myxomatous Mitral Valves: Patient Data**

| <b>Patient</b> | <b>Age</b> | <b>Sex</b> | <b>Smoking Status*</b> | <b>Transplant Indication</b> |
|----------------|------------|------------|------------------------|------------------------------|
| N1             | 43         | M          | 0                      | Restrictive Cardiomyopathy   |
| N2             | 66         | M          | 1                      | Ischemic Cardiomyopathy      |
| N3             | 54         | M          | 0                      | Ischemic Cardiomyopathy      |
| N4             | 49         | M          | 0                      | Restrictive Cardiomyopathy   |
| N5             | 39         | F          | 0                      | Restrictive Cardiomyopathy   |
| N6             | 53         | M          | 0                      | Ischemic Cardiomyopathy      |
| N7             | 60         | M          | 1                      | Dilated Cardiomyopathy       |
| N8             | 26         | F          | 0                      | Dilated Cardiomyopathy       |
| N9             | 64         | M          | 1                      | Ischemic Cardiomyopathy      |
| N10            | 22         | M          | 0                      | Dilated Cardiomyopathy       |
| N11            | 67         | M          | 0                      | Ischemic Cardiomyopathy      |

M = Male; F = Female

\*Smoking status: 0 = never smoker, 1 = previous smoker, 2 = current smoker

**Table S4. Myxomatous Mitral Valves: Patient Data**

| <b>Patient</b> | <b>Age</b> | <b>Sex</b> | <b>Smoking Status*</b> | <b>MR Severity</b> | <b>Affected Leaflet</b> | <b>ERO (cm<sup>2</sup>)</b> | <b>Regurgitant Volume (cc)</b> |
|----------------|------------|------------|------------------------|--------------------|-------------------------|-----------------------------|--------------------------------|
| M1             | 66         | F          | 0                      | 4+                 | P                       | 0.64                        | 119                            |
| M2             | 78         | M          | 0                      | 3+                 | B                       | 0.36                        | 62                             |
| M3             | 67         | M          | 1                      | 4+                 | P                       | 0.51                        | 71                             |
| M4             | 65         | M          | 0                      | 4+                 | B                       | 0.44                        | 60                             |
| M5             | 57         | M          | 0                      | 4+                 | P                       | 0.61                        | 85                             |
| M6             | 77         | M          | 1                      | 4+                 | P                       | 0.31                        | 53                             |
| M7             | 67         | F          | 0                      | 3+                 | B                       | 0.27                        | 66                             |
| M8             | 56         | M          | 1                      | 4+                 | B                       | 1.32                        | 148                            |
| M9             | 57         | F          | 0                      | 4+                 | B                       | 0.71                        | 98                             |
| M10            | 57         | M          | 0                      | 4+                 | B                       | 0.51                        | 75                             |
| M11            | 85         | F          | 0                      | 4+                 | P                       | 0.49                        | 75                             |

B = bi-leaflet; ERO = effective regurgitant volume; F = female; M = male; MR = mitral regurgitation; P = posterior leaflet

3+ = moderate-severe, 4+ = severe MR.

\*Smoking status: 0 = never smoker, 1 = previous smoker, 2 = current smoker



**Table S5. Patient Medications**

| <b>Drug Class</b> | <b>Non-Myxomatous (n=11)</b> | <b>Myxomatous (n=11)</b> |
|-------------------|------------------------------|--------------------------|
| Beta-blockers     | 6                            | 4                        |
| ACE-I/ARBs        | 3                            | 3                        |
| Nitrates          | 1                            | 1                        |
| Anticoagulants    | 4                            | 2                        |
| Statins           | 3                            | 7                        |
| 5-HT Related*     | 5                            | 1                        |
| Other             | 11                           | 11                       |

ACE-I = Angiotensin converting-enzyme inhibitors; ARBs = Angiotensin receptor blockers; 5-HT = Serotonin

\* Drugs known to alter tissue serotonin levels (Serotonin reuptake inhibitors [SRIs], selective SRIs [SSRIs], monoamine oxidase inhibitors [MAOIs], etc)

**Table S6. Full Microarray Dataset**

| Gene Title                                                                                    | Gene Symbol     | Fold Change | P       | Adjusted P |
|-----------------------------------------------------------------------------------------------|-----------------|-------------|---------|------------|
| 1-acylglycerol-3-phosphate O-acyltransferase 4 (lysophosphatidic acid acyltransferase, delta) | AGPAT4          | 2.154       | 0.00011 | 0.00212    |
| 2',5'-oligoadenylate synthetase 1, 40/46kDa                                                   | OAS1            | 3.966       | 0.00012 | 0.00221    |
| 24-dehydrocholesterol reductase                                                               | DHCR24          | -1.925      | 0.01160 | 0.03843    |
| 2'-5'-oligoadenylate synthetase 2, 69/71kDa                                                   | OAS2            | 1.900       | 0.01630 | 0.04803    |
| 2'-5'-oligoadenylate synthetase 3, 100kDa                                                     | OAS3            | 1.997       | 0.00445 | 0.02101    |
| 3-oxoacid CoA transferase 2                                                                   | OXCT2           | -1.861      | 0.02340 | 0.06090    |
| 3'-phosphoadenosine 5'-phosphosulfate synthase 1                                              | PAPSS1          | 1.628       | 0.00010 | 0.00200    |
| 4-aminobutyrate aminotransferase                                                              | ABAT            | -3.250      | 0.00313 | 0.01670    |
| 5-hydroxytryptamine (serotonin) receptor 2A                                                   | HTR2A           | 1.569       | 0.04150 | 0.08763    |
| 5-hydroxytryptamine (serotonin) receptor 2B                                                   | HTR2B           | 4.439       | 0.00003 | 0.00099    |
| 5'-nucleotidase, ecto (CD73)                                                                  | NT5E            | 3.162       | 0.00028 | 0.00363    |
| A kinase (PRKA) anchor protein 13                                                             | AKAP13          | -1.703      | 0.01070 | 0.03655    |
| abhydrolase domain containing 10                                                              | ABHD10          | 1.613       | 0.00210 | 0.01309    |
| abhydrolase domain containing 14A                                                             | ABHD14A         | 1.597       | 0.00047 | 0.00511    |
| ABI family, member 3 (NESH) binding protein                                                   | ABI3BP          | 1.735       | 0.04690 | 0.09462    |
| absent in melanoma 1                                                                          | AIM1            | 2.578       | 0.00004 | 0.00102    |
| acid phosphatase-like 2                                                                       | ACPL2           | 1.663       | 0.00008 | 0.00176    |
| acidic (leucine-rich) nuclear phosphoprotein 32 family, member E                              | ANP32E          | -1.666      | 0.00818 | 0.03094    |
| actin filament associated protein 1-like 1                                                    | AFAP1L1         | -7.525      | 0.00215 | 0.01325    |
| actin filament associated protein 1-like 2                                                    | AFAP1L2         | 1.577       | 0.00083 | 0.00727    |
| actin, alpha 2, smooth muscle, aorta                                                          | ACTA2           | -3.945      | 0.00157 | 0.01086    |
| actin, alpha, cardiac muscle 1                                                                | ACTC1           | -18.326     | 0.03320 | 0.07640    |
| actin, gamma 2, smooth muscle, enteric                                                        | ACTG2           | -99.874     | 0.00110 | 0.00869    |
| activating signal cointegrator 1 complex subunit 1                                            | ASCC1           | -1.696      | 0.03660 | 0.08124    |
| activating transcription factor 3                                                             | ATF3            | -34.981     | 0.00001 | 0.00042    |
| activating transcription factor 7                                                             | ATF7            | -2.104      | 0.00123 | 0.00930    |
| activin A receptor, type I                                                                    | ACVR1           | 1.739       | 0.00001 | 0.00036    |
| activin A receptor, type IB                                                                   | ACVR1B          | -1.748      | 0.00049 | 0.00527    |
| acyl-CoA synthetase long-chain family member 1                                                | ACSL1           | -2.711      | 0.00002 | 0.00063    |
| acyl-CoA synthetase long-chain family member 5                                                | ACSL5           | -2.587      | 0.04260 | 0.08924    |
| acyl-CoA synthetase medium-chain family member 3                                              | ACSM3           | -3.356      | 0.02820 | 0.06862    |
| acyl-CoA thioesterase 1 /// acyl-CoA thioesterase 2                                           | ACOT1 /// ACOT2 | -1.691      | 0.01320 | 0.04188    |
| acyl-CoA thioesterase 4                                                                       | ACOT4           | 2.245       | 0.00012 | 0.00221    |
| acyl-CoA thioesterase 7                                                                       | ACOT7           | 1.542       | 0.00067 | 0.00637    |
| acyl-Coenzyme A dehydrogenase, long chain                                                     | ACADL           | -1.955      | 0.02670 | 0.06637    |
| acylphosphatase 2, muscle type                                                                | ACYP2           | -1.729      | 0.01960 | 0.05427    |
| ADAM metalloproteinase domain 12                                                              | ADAM12          | 1.609       | 0.00207 | 0.01298    |
| ADAM metalloproteinase with thrombospondin type 1 motif, 1                                    | ADAMTS1         | -7.133      | 0.00000 | 0.00026    |
| ADAM metalloproteinase with thrombospondin type 1 motif, 19                                   | ADAMTS19        | 1.763       | 0.01520 | 0.04600    |
| ADAM metalloproteinase with thrombospondin type 1 motif, 5                                    | ADAMTS5         | -4.906      | 0.00726 | 0.02872    |
| ADAM metalloproteinase with thrombospondin type 1 motif, 6                                    | ADAMTS6         | 2.361       | 0.00007 | 0.00161    |
| ADAM metalloproteinase with thrombospondin type 1 motif, 9                                    | ADAMTS9         | -11.543     | 0.04920 | 0.09753    |
| ADAMTS-like 2                                                                                 | ADAMTSL2        | 1.810       | 0.02600 | 0.06526    |
| adaptor-related protein complex 4, sigma 1 subunit                                            | AP4S1           | -1.602      | 0.02670 | 0.06637    |
| adducin 3 (gamma)                                                                             | ADD3            | 1.782       | 0.00000 | 0.00016    |
| adenomatosis polyposis coli down-regulated 1                                                  | APCDD1          | 1.771       | 0.00592 | 0.02522    |
| adenosine deaminase, tRNA-specific 1                                                          | ADAT1           | 1.777       | 0.00008 | 0.00170    |
| adenosine monophosphate deaminase 2 (isoform L)                                               | AMPD2           | 1.603       | 0.00354 | 0.01818    |

|                                                                                         |                   |         |         |         |
|-----------------------------------------------------------------------------------------|-------------------|---------|---------|---------|
| adenylate cyclase 1 (brain)                                                             | ADCY1             | -9.237  | 0.00464 | 0.02164 |
| adenylate cyclase 2 (brain)                                                             | ADCY2             | 1.746   | 0.00669 | 0.02726 |
| adenylate cyclase 5                                                                     | ADCY5             | -2.670  | 0.04600 | 0.09346 |
| adenylate cyclase 7                                                                     | ADCY7             | 1.995   | 0.00250 | 0.01447 |
| ADP-ribosylation factor guanine nucleotide-exchange factor 2 (brefeldin A-inhibited)    | ARFGEF2           | -1.797  | 0.00462 | 0.02157 |
| ADP-ribosylation factor-like 4A                                                         | ARL4A             | -1.622  | 0.02230 | 0.05907 |
| ADP-ribosylation factor-like 6                                                          | ARL6              | 1.519   | 0.00948 | 0.03394 |
| adrenergic, alpha-2C-, receptor                                                         | ADRA2C            | -3.443  | 0.02290 | 0.06004 |
| adrenomedullin                                                                          | ADM               | -6.721  | 0.00225 | 0.01360 |
| AE binding protein 1                                                                    | AEBP1             | 1.528   | 0.00175 | 0.01163 |
| AF4/FMR2 family, member 1                                                               | AFF1              | -1.744  | 0.00058 | 0.00585 |
| AF4/FMR2 family, member 3                                                               | AFF3              | 2.262   | 0.00127 | 0.00949 |
| aggrecan                                                                                | ACAN              | -2.409  | 0.04280 | 0.08947 |
| AHNAK nucleoprotein 2                                                                   | AHNAK2            | 1.776   | 0.00792 | 0.03028 |
| akirin 1                                                                                | AKIRIN1           | -1.688  | 0.00588 | 0.02516 |
| alcohol dehydrogenase 1B (class I), beta polypeptide                                    | ADH1B             | -1.792  | 0.01850 | 0.05236 |
| alcohol dehydrogenase, iron containing, 1                                               | ADHFE1            | -2.321  | 0.00018 | 0.00285 |
| aldehyde dehydrogenase 1 family, member A2                                              | ALDH1A2           | -2.524  | 0.04180 | 0.08811 |
| aldehyde dehydrogenase 1 family, member A3                                              | ALDH1A3           | 2.695   | 0.00282 | 0.01559 |
| aldehyde dehydrogenase 1 family, member L1                                              | ALDH1L1           | -5.103  | 0.00001 | 0.00042 |
| aldehyde dehydrogenase 1 family, member L2                                              | ALDH1L2           | 1.959   | 0.00019 | 0.00289 |
| aldehyde dehydrogenase 18 family, member A1                                             | ALDH18A1          | 2.840   | 0.00001 | 0.00034 |
| aldehyde dehydrogenase 3 family, member A2                                              | ALDH3A2           | 1.811   | 0.00245 | 0.01431 |
| aldehyde dehydrogenase 4 family, member A1                                              | ALDH4A1           | -1.648  | 0.01210 | 0.03950 |
| aldehyde dehydrogenase 5 family, member A1                                              | ALDH5A1           | 1.518   | 0.02260 | 0.05950 |
| aldehyde dehydrogenase 6 family, member A1                                              | ALDH6A1           | -1.789  | 0.00076 | 0.00685 |
| aldehyde oxidase 1                                                                      | AOX1              | -6.066  | 0.00551 | 0.02415 |
| aldo-keto reductase family 1, member B10 (aldose reductase)                             | AKR1B10           | -2.297  | 0.00941 | 0.03377 |
| aldo-keto reductase family 1, member C3 (3-alpha hydroxysteroid dehydrogenase, type II) | AKR1C3            | 1.623   | 0.00501 | 0.02271 |
| alkaline ceramidase 3                                                                   | ACER3             | -1.525  | 0.00839 | 0.03143 |
| alkB, alkylation repair homolog 8 (E. coli)                                             | ALKBH8            | 1.715   | 0.00043 | 0.00478 |
| alkylglycerone phosphate synthase                                                       | AGPS              | 1.596   | 0.00001 | 0.00049 |
| alpha-2-macroglobulin                                                                   | A2M               | -3.115  | 0.00178 | 0.01173 |
| alpha-methylacyl-CoA racemase                                                           | AMACR             | 3.286   | 0.00002 | 0.00070 |
| alpha-methylacyl-CoA racemase /// C1q and tumor necrosis factor related protein 3       | AMACR /// C1QTNF3 | 2.229   | 0.04830 | 0.09639 |
| aminoadipate-semialdehyde synthase                                                      | AASS              | -2.613  | 0.00033 | 0.00411 |
| amphiregulin                                                                            | AREG              | -35.971 | 0.01760 | 0.05063 |
| androgen-induced 1                                                                      | AIG1              | 1.678   | 0.00013 | 0.00236 |
| angiomin like 2                                                                         | AMOTL2            | -1.723  | 0.00099 | 0.00811 |
| angiopoietin 1                                                                          | ANGPT1            | -1.642  | 0.03550 | 0.07959 |
| angiopoietin-like 1                                                                     | ANGPTL1           | -1.704  | 0.02430 | 0.06242 |
| angiopoietin-like 2                                                                     | ANGPTL2           | 3.518   | 0.00008 | 0.00173 |
| angiopoietin-like 4                                                                     | ANGPTL4           | -2.486  | 0.01250 | 0.04030 |
| angiopoietin-like 7                                                                     | ANGPTL7           | -6.301  | 0.00198 | 0.01262 |
| angiotensin II receptor, type 1                                                         | AGTR1             | -16.810 | 0.00126 | 0.00945 |
| ankylosis, progressive homolog (mouse)                                                  | ANKH              | 1.848   | 0.00204 | 0.01287 |
| ankyrin 2, neuronal                                                                     | ANK2              | 2.219   | 0.00011 | 0.00203 |
| ankyrin repeat and KH domain containing 1                                               | ANKHD1            | -2.282  | 0.00551 | 0.02415 |
| ankyrin repeat and SOCS box-containing 2                                                | ASB2              | -16.720 | 0.03410 | 0.07762 |
| ankyrin repeat and SOCS box-containing 6                                                | ASB6              | 1.599   | 0.00050 | 0.00533 |

|                                                                                                                                                                 |                                                          |         |         |         |
|-----------------------------------------------------------------------------------------------------------------------------------------------------------------|----------------------------------------------------------|---------|---------|---------|
| ankyrin repeat and sterile alpha motif domain containing 1B                                                                                                     | ANKS1B                                                   | -1.969  | 0.02980 | 0.07116 |
| ankyrin repeat domain 10                                                                                                                                        | ANKRD10                                                  | 1.672   | 0.02180 | 0.05821 |
| ankyrin repeat domain 13 family, member D                                                                                                                       | ANKRD13D                                                 | 1.769   | 0.00193 | 0.01245 |
| ankyrin repeat domain 22                                                                                                                                        | ANKRD22                                                  | -1.635  | 0.01820 | 0.05188 |
| ankyrin repeat domain 28                                                                                                                                        | ANKRD28                                                  | -1.838  | 0.04840 | 0.09648 |
| ankyrin repeat domain 35                                                                                                                                        | ANKRD35                                                  | 1.688   | 0.01420 | 0.04393 |
| ankyrin repeat domain 37                                                                                                                                        | ANKRD37                                                  | -2.014  | 0.00001 | 0.00047 |
| ankyrin repeat domain 43                                                                                                                                        | ANKRD43                                                  | 2.524   | 0.00061 | 0.00603 |
| ankyrin repeat domain 45                                                                                                                                        | ANKRD45                                                  | 2.236   | 0.00084 | 0.00730 |
| ankyrin repeat domain 6                                                                                                                                         | ANKRD6                                                   | 1.553   | 0.00310 | 0.01660 |
| annexin A3                                                                                                                                                      | ANXA3                                                    | 1.798   | 0.02440 | 0.06258 |
| annexin A4                                                                                                                                                      | ANXA4                                                    | 1.602   | 0.00000 | 0.00007 |
| anoctamin 1, calcium activated chloride channel                                                                                                                 | ANO1                                                     | 1.674   | 0.00757 | 0.02947 |
| anoctamin 3                                                                                                                                                     | ANO3                                                     | -2.624  | 0.04040 | 0.08636 |
| anoctamin 8                                                                                                                                                     | ANO8                                                     | 1.518   | 0.00014 | 0.00241 |
| anthrax toxin receptor 1                                                                                                                                        | ANTXR1                                                   | 2.172   | 0.00102 | 0.00824 |
| antigen p97 (melanoma associated) identified by monoclonal antibodies 133.2 and 96.5                                                                            | MFI2                                                     | 1.681   | 0.00024 | 0.00335 |
| apolipoprotein B (including Ag(x) antigen)                                                                                                                      | APOB                                                     | -3.760  | 0.04890 | 0.09715 |
| apolipoprotein E                                                                                                                                                | APOE                                                     | -2.274  | 0.01710 | 0.04964 |
| apolipoprotein L domain containing 1                                                                                                                            | APOLD1                                                   | -13.161 | 0.00041 | 0.00468 |
| apolipoprotein L, 1                                                                                                                                             | APOL1                                                    | 1.873   | 0.00054 | 0.00556 |
| apolipoprotein L, 3                                                                                                                                             | APOL3                                                    | 2.332   | 0.00000 | 0.00022 |
| apolipoprotein L, 6                                                                                                                                             | APOL6                                                    | 1.667   | 0.00121 | 0.00921 |
| apolipoprotein O-like                                                                                                                                           | APOOL                                                    | -1.901  | 0.01790 | 0.05126 |
| apoptosis enhancing nuclease                                                                                                                                    | AEN                                                      | 1.566   | 0.00018 | 0.00279 |
| aquaporin 1 (Colton blood group) /// indoethylamine N-methyltransferase                                                                                         | AQP1 /// INMT                                            | 1.545   | 0.04760 | 0.09557 |
| arachidonate 15-lipoxygenase, type B                                                                                                                            | ALOX15B                                                  | -2.015  | 0.01390 | 0.04334 |
| ArfGAP with dual PH domains 1                                                                                                                                   | ADAP1                                                    | -1.791  | 0.00010 | 0.00193 |
| ArfGAP with dual PH domains 2                                                                                                                                   | ADAP2                                                    | 1.774   | 0.02190 | 0.05840 |
| ArfGAP with GTPase domain, ankyrin repeat and PH domain 1                                                                                                       | AGAP1                                                    | 1.569   | 0.01170 | 0.03865 |
| ArfGAP with RhoGAP domain, ankyrin repeat and PH domain 1                                                                                                       | ARAP1                                                    | 1.592   | 0.00233 | 0.01387 |
| ArfGAP with RhoGAP domain, ankyrin repeat and PH domain 2                                                                                                       | ARAP2                                                    | 2.580   | 0.00147 | 0.01042 |
| ArfGAP with RhoGAP domain, ankyrin repeat and PH domain 3                                                                                                       | ARAP3                                                    | -2.089  | 0.03110 | 0.07326 |
| ArfGAP with SH3 domain, ankyrin repeat and PH domain 1                                                                                                          | ASAP1                                                    | -1.748  | 0.03870 | 0.08415 |
| ArfGAP with SH3 domain, ankyrin repeat and PH domain 3                                                                                                          | ASAP3                                                    | 1.788   | 0.00008 | 0.00170 |
| arginine decarboxylase                                                                                                                                          | ADC                                                      | 1.681   | 0.00006 | 0.00149 |
| arginine-glutamic acid dipeptide (RE) repeats                                                                                                                   | RERE                                                     | -1.853  | 0.00000 | 0.00022 |
| arginyl aminopeptidase (aminopeptidase B) /// transmembrane protein 189 /// TMEM189-UBE2V1 readthrough transcript /// ubiquitin-conjugating enzyme E2 variant 1 | RNPEP ///<br>TMEM189 ///<br>TMEM189-UBE2V1<br>/// UBE2V1 | 1.518   | 0.00013 | 0.00227 |
| ariadne homolog 2 (Drosophila)                                                                                                                                  | ARIH2                                                    | -2.180  | 0.00000 | 0.00010 |
| ariadne homolog, ubiquitin-conjugating enzyme E2 binding protein, 1 (Drosophila)                                                                                | ARIH1                                                    | -1.706  | 0.00063 | 0.00616 |
| armadillo repeat containing 8                                                                                                                                   | ARMC8                                                    | -1.990  | 0.00312 | 0.01667 |
| armadillo repeat containing 9                                                                                                                                   | ARMC9                                                    | 2.038   | 0.00025 | 0.00339 |
| armadillo repeat containing, X-linked 4                                                                                                                         | ARMCX4                                                   | 1.543   | 0.01380 | 0.04312 |
| ARP3 actin-related protein 3 homolog (yeast)                                                                                                                    | ACTR3                                                    | -1.585  | 0.02440 | 0.06258 |
| arrestin domain containing 2                                                                                                                                    | ARRDC2                                                   | -2.814  | 0.00005 | 0.00126 |
| arrestin domain containing 3                                                                                                                                    | ARRDC3                                                   | -2.051  | 0.00209 | 0.01304 |
| aryl hydrocarbon receptor                                                                                                                                       | AHR                                                      | 1.733   | 0.00794 | 0.03031 |
| aryl hydrocarbon receptor nuclear translocator-like                                                                                                             | ARNTL                                                    | -9.757  | 0.00010 | 0.00193 |

|                                                                                                   |          |         |         |         |
|---------------------------------------------------------------------------------------------------|----------|---------|---------|---------|
| aryl hydrocarbon receptor nuclear translocator-like 2                                             | ARNTL2   | 1.808   | 0.00581 | 0.02495 |
| arylsulfatase E (chondrodysplasia punctata 1)                                                     | ARSE     | 2.210   | 0.00226 | 0.01362 |
| arylsulfatase family, member I                                                                    | ARSI     | 1.510   | 0.00026 | 0.00346 |
| asparagine-linked glycosylation 1, beta-1,4-mannosyltransferase homolog ( <i>S. cerevisiae</i> )  | ALG1     | 1.723   | 0.00687 | 0.02769 |
| asparagine-linked glycosylation 13 homolog ( <i>S. cerevisiae</i> )                               | ALG13    | -1.960  | 0.00271 | 0.01520 |
| asparagine-linked glycosylation 6, alpha-1,3-glucosyltransferase homolog ( <i>S. cerevisiae</i> ) | ALG6     | 1.691   | 0.00146 | 0.01039 |
| aspartoacylase (Canavan disease)                                                                  | ASPA     | 2.604   | 0.00531 | 0.02353 |
| aspartylglucosaminidase                                                                           | AGA      | 1.660   | 0.00038 | 0.00446 |
| asteroid homolog 1 ( <i>Drosophila</i> )                                                          | ASTE1    | 1.785   | 0.00002 | 0.00065 |
| astrotactin 2                                                                                     | ASTN2    | -2.686  | 0.02370 | 0.06141 |
| AT rich interactive domain 5B (MRF1-like)                                                         | ARID5B   | -2.318  | 0.00000 | 0.00004 |
| Atonal homolog 8 ( <i>Drosophila</i> )                                                            | ATOH8    | -1.885  | 0.02260 | 0.05950 |
| ATP synthase, H <sup>+</sup> transporting, mitochondrial F0 complex, subunit C2 (subunit 9)       | ATP5G2   | -1.508  | 0.03290 | 0.07597 |
| ATP synthase, H <sup>+</sup> transporting, mitochondrial F0 complex, subunit G                    | ATP5L    | -1.565  | 0.01240 | 0.04009 |
| ATP synthase, H <sup>+</sup> transporting, mitochondrial F0 complex, subunit s (factor B)         | ATP5S    | -2.455  | 0.01950 | 0.05408 |
| ATP/GTP binding protein 1                                                                         | AGTPBP1  | -1.772  | 0.03540 | 0.07942 |
| ATP/GTP binding protein-like 3                                                                    | AGBL3    | 1.516   | 0.00473 | 0.02192 |
| ATPase family, AAA domain containing 2                                                            | ATAD2    | -2.531  | 0.00039 | 0.00455 |
| ATPase, aminophospholipid transporter (APLT), class I, type 8A, member 1                          | ATP8A1   | 1.698   | 0.00243 | 0.01426 |
| ATPase, Ca <sup>++</sup> transporting, cardiac muscle, slow twitch 2                              | ATP2A2   | -5.229  | 0.04690 | 0.09462 |
| ATPase, Ca <sup>++</sup> transporting, ubiquitous                                                 | ATP2A3   | 1.845   | 0.00337 | 0.01758 |
| ATPase, class V, type 10A                                                                         | ATP10A   | -4.193  | 0.00004 | 0.00107 |
| ATPase, H <sup>+</sup> transporting V0 subunit e2                                                 | ATP6V0E2 | 1.574   | 0.01890 | 0.05309 |
| ATPase, H <sup>+</sup> transporting, lysosomal 42kDa, V1 subunit C1                               | ATP6V1C1 | -1.978  | 0.01960 | 0.05427 |
| ATPase, Na <sup>+</sup> /K <sup>+</sup> transporting, alpha 2 (+) polypeptide                     | ATP1A2   | -12.988 | 0.00001 | 0.00032 |
| ATP-binding cassette, sub-family A (ABC1), member 3                                               | ABCA3    | 1.739   | 0.00002 | 0.00083 |
| ATP-binding cassette, sub-family C (CFTR/MRP), member 4                                           | ABCC4    | 2.150   | 0.00743 | 0.02913 |
| ATP-binding cassette, sub-family C (CFTR/MRP), member 9                                           | ABCC9    | -1.600  | 0.01600 | 0.04748 |
| ATP-binding cassette, sub-family G (WHITE), member 1                                              | ABCG1    | 2.305   | 0.03050 | 0.07232 |
| attractin                                                                                         | ATRN     | 2.047   | 0.00101 | 0.00819 |
| autism susceptibility candidate 2                                                                 | AUTS2    | 1.588   | 0.00123 | 0.00930 |
| B9 protein domain 1                                                                               | B9D1     | 1.746   | 0.00425 | 0.02042 |
| BAH domain and coiled-coil containing 1                                                           | BAHCC1   | 2.091   | 0.00010 | 0.00193 |
| basal cell adhesion molecule (Lutheran blood group)                                               | BCAM     | -2.135  | 0.02810 | 0.06847 |
| basic helix-loop-helix domain containing, class B, 9                                              | BHLHB9   | 1.911   | 0.00003 | 0.00086 |
| basic helix-loop-helix family, member e40                                                         | BHLHE40  | 3.159   | 0.00174 | 0.01159 |
| basic helix-loop-helix family, member e41                                                         | BHLHE41  | 3.229   | 0.00030 | 0.00384 |
| B-cell CLL/lymphoma 3                                                                             | BCL3     | 1.525   | 0.00741 | 0.02909 |
| B-cell CLL/lymphoma 6                                                                             | BCL6     | -2.066  | 0.01860 | 0.05251 |
| B-cell CLL/lymphoma 7A                                                                            | BCL7A    | -1.623  | 0.00707 | 0.02824 |
| B-cell linker                                                                                     | BLNK     | 3.206   | 0.00093 | 0.00782 |
| B-cell translocation gene 1, anti-proliferative                                                   | BTG1     | -2.771  | 0.00000 | 0.00004 |
| BCL2/adenovirus E1B 19kDa interacting protein 3                                                   | BNIP3    | -2.061  | 0.00976 | 0.03452 |
| BCL2-associated athanogene 5                                                                      | BAG5     | 2.143   | 0.00023 | 0.00324 |
| BCL2-associated X protein                                                                         | BAX      | 1.766   | 0.00353 | 0.01814 |
| BEN domain containing 6                                                                           | BEND6    | 2.908   | 0.00023 | 0.00328 |
| beta-1,3-N-acetylgalactosaminyltransferase 1 (globoside blood group)                              | B3GALNT1 | 1.560   | 0.00423 | 0.02035 |
| beta-1,3-N-acetylgalactosaminyltransferase 2                                                      | B3GALNT2 | -1.678  | 0.00807 | 0.03068 |

|                                                                                   |                         |         |         |         |
|-----------------------------------------------------------------------------------|-------------------------|---------|---------|---------|
| beta-1,4-N-acetyl-galactosaminyl transferase 3                                    | B4GALNT3                | 1.910   | 0.00019 | 0.00293 |
| betacellulin                                                                      | BTC                     | 1.742   | 0.02290 | 0.06004 |
| beta-site APP-cleaving enzyme 2                                                   | BACE2                   | 1.514   | 0.00510 | 0.02296 |
| bicaudal D homolog 1 (Drosophila)                                                 | BICD1                   | 1.724   | 0.00299 | 0.01621 |
| biglycan                                                                          | BGN                     | 1.520   | 0.00625 | 0.02609 |
| biotinidase                                                                       | BTD                     | -1.661  | 0.04880 | 0.09703 |
| biphenyl hydrolase-like (serine hydrolase)                                        | BPHL                    | 1.573   | 0.00010 | 0.00199 |
| block of proliferation 1 /// similar to block of proliferation 1                  | BOP1 ///<br>LOC727967   | 1.593   | 0.00011 | 0.00209 |
| BMP and activin membrane-bound inhibitor homolog (Xenopus laevis)                 | BAMBI                   | -1.757  | 0.03720 | 0.08208 |
| BMP binding endothelial regulator                                                 | BMPER                   | 3.048   | 0.00003 | 0.00087 |
| BMP2 inducible kinase                                                             | BMP2K                   | 1.613   | 0.01220 | 0.03971 |
| bone marrow stromal cell antigen 1                                                | BST1                    | 1.885   | 0.01150 | 0.03823 |
| bone morphogenetic protein 4                                                      | BMP4                    | 1.955   | 0.00090 | 0.00765 |
| bradykinin receptor B2                                                            | BDKRB2                  | 3.701   | 0.00005 | 0.00126 |
| brain expressed, associated with Nedd4                                            | BEAN                    | 1.789   | 0.00497 | 0.02262 |
| brain expressed, X-linked 1                                                       | BEX1                    | 1.818   | 0.01230 | 0.03990 |
| brain-derived neurotrophic factor                                                 | BDNF                    | 1.512   | 0.04820 | 0.09633 |
| branched chain keto acid dehydrogenase E1, beta polypeptide                       | BCKDHB                  | -1.717  | 0.03950 | 0.08519 |
| BRCA2 and CDKN1A interacting protein                                              | BCCIP                   | -1.523  | 0.00009 | 0.00187 |
| breast cancer 1, early onset                                                      | BRCA1                   | 1.550   | 0.00249 | 0.01444 |
| breast cancer metastasis-suppressor 1-like                                        | BRMS1L                  | -1.654  | 0.00714 | 0.02839 |
| bromodomain adjacent to zinc finger domain, 1A                                    | BAZ1A                   | -1.562  | 0.02610 | 0.06538 |
| bromodomain and WD repeat domain containing 1                                     | BRWD1                   | -1.538  | 0.02230 | 0.05907 |
| bromodomain containing 4                                                          | BRD4                    | -1.647  | 0.01800 | 0.05148 |
| BTB (POZ) domain containing 11                                                    | BTBD11                  | 2.520   | 0.00212 | 0.01315 |
| BTG family, member 2                                                              | BTG2                    | -18.139 | 0.00004 | 0.00103 |
| butyrophilin, subfamily 2, member A2                                              | BTN2A2                  | 1.525   | 0.00092 | 0.00777 |
| butyrophilin, subfamily 3, member A1                                              | BTN3A1                  | 1.613   | 0.00628 | 0.02618 |
| butyrophilin, subfamily 3, member A3                                              | BTN3A3                  | 2.219   | 0.00001 | 0.00044 |
| C1q and tumor necrosis factor related protein 2                                   | C1QTNF2                 | 3.674   | 0.00008 | 0.00168 |
| C1q and tumor necrosis factor related protein 9 /// spermatogenesis associated 13 | C1QTNF9 ///<br>SPATA13  | 1.674   | 0.00057 | 0.00578 |
| cache domain containing 1                                                         | CACHD1                  | 1.555   | 0.00391 | 0.01935 |
| cadherin 11, type 2, OB-cadherin (osteoblast)                                     | CDH11                   | 1.662   | 0.00004 | 0.00114 |
| cadherin 2, type 1, N-cadherin (neuronal)                                         | CDH2                    | -2.429  | 0.01630 | 0.04803 |
| cadherin 5, type 2 (vascular endothelium)                                         | CDH5                    | -2.442  | 0.04720 | 0.09501 |
| calcineurin-like phosphoesterase domain containing 1                              | CPPED1                  | 1.577   | 0.00512 | 0.02301 |
| calcium binding and coiled-coil domain 2                                          | CALCOCO2                | -1.669  | 0.00000 | 0.00017 |
| calcium channel, voltage-dependent, alpha 2/delta subunit 2                       | CACNA2D2                | 1.633   | 0.00385 | 0.01919 |
| calcium channel, voltage-dependent, beta 2 subunit                                | CACNB2                  | -12.749 | 0.02270 | 0.05971 |
| calcium channel, voltage-dependent, beta 3 subunit                                | CACNB3                  | 1.912   | 0.00001 | 0.00047 |
| calcium channel, voltage-dependent, beta 4 subunit                                | CACNB4                  | 1.650   | 0.00008 | 0.00177 |
| calcium channel, voltage-dependent, L type, alpha 1C subunit                      | CACNA1C                 | -3.707  | 0.00484 | 0.02228 |
| calcium channel, voltage-dependent, P/Q type, alpha 1A subunit                    | CACNA1A                 | 1.918   | 0.00284 | 0.01565 |
| calcium/calmodulin-dependent protein kinase ID                                    | CAMK1D                  | 2.362   | 0.00000 | 0.00005 |
| calcium/calmodulin-dependent protein kinase ID /// hypothetical LOC283070         | CAMK1D ///<br>LOC283070 | 2.762   | 0.00000 | 0.00008 |
| calcium/calmodulin-dependent protein kinase kinase 1, alpha                       | CAMKK1                  | 2.017   | 0.00014 | 0.00237 |
| calcium/calmodulin-dependent protein kinase kinase 2, beta                        | CAMKK2                  | 1.586   | 0.00074 | 0.00671 |
| calcium/calmodulin-dependent serine protein kinase (MAGUK family)                 | CASK                    | 1.515   | 0.00008 | 0.00170 |
| caldesmon 1                                                                       | CALD1                   | -2.558  | 0.01300 | 0.04135 |
| calmin (calponin-like, transmembrane)                                             | CLMN                    | -1.779  | 0.01590 | 0.04727 |

|                                                                                   |         |          |         |         |
|-----------------------------------------------------------------------------------|---------|----------|---------|---------|
| Calmodulin binding transcription activator 1                                      | CAMTA1  | -1.694   | 0.00741 | 0.02909 |
| calpain 5                                                                         | CAPN5   | 2.424    | 0.00132 | 0.00973 |
| calponin 1, basic, smooth muscle                                                  | CNN1    | -13.422  | 0.00631 | 0.02626 |
| calponin 2                                                                        | CNN2    | -1.808   | 0.00024 | 0.00329 |
| calsequestrin 2 (cardiac muscle)                                                  | CASQ2   | -130.216 | 0.02420 | 0.06227 |
| cAMP responsive element binding protein 3-like 2                                  | CREB3L2 | 1.627    | 0.00000 | 0.00030 |
| cAMP responsive element binding protein 5                                         | CREB5   | 2.823    | 0.00106 | 0.00846 |
| cannabinoid receptor 1 (brain)                                                    | CNR1    | 3.115    | 0.00244 | 0.01428 |
| canopy 4 homolog (zebrafish)                                                      | CNPY4   | 1.915    | 0.00001 | 0.00039 |
| CAP-GLY domain containing linker protein 2                                        | CLIP2   | 2.309    | 0.00002 | 0.00069 |
| CAP-GLY domain containing linker protein family, member 4                         | CLIP4   | -1.505   | 0.02960 | 0.07084 |
| capping protein (actin filament) muscle Z-line, alpha 2                           | CAPZA2  | -1.623   | 0.00669 | 0.02726 |
| capping protein (actin filament), gelsolin-like                                   | CAPG    | 1.793    | 0.02740 | 0.06734 |
| carbamoyl-phosphate synthetase 1, mitochondrial                                   | CPS1    | 1.560    | 0.00035 | 0.00424 |
| Carbohydrate (chondroitin 4) sulfotransferase 11                                  | CHST11  | -1.631   | 0.03180 | 0.07441 |
| carbohydrate (chondroitin 4) sulfotransferase 12                                  | CHST12  | 1.614    | 0.00007 | 0.00153 |
| carbohydrate (keratan sulfate Gal-6) sulfotransferase 1                           | CHST1   | -2.124   | 0.02440 | 0.06258 |
| carbohydrate (N-acetylgalactosamine 4-O) sulfotransferase 9                       | CHST9   | 2.438    | 0.00466 | 0.02171 |
| carbohydrate (N-acetylglucosamine 6-O) sulfotransferase 6                         | CHST6   | 5.437    | 0.00001 | 0.00050 |
| carbohydrate (N-acetylglucosamine 6-O) sulfotransferase 7                         | CHST7   | -5.650   | 0.01120 | 0.03762 |
| carbohydrate (N-acetylglucosamine-6-O) sulfotransferase 2                         | CHST2   | 5.108    | 0.00000 | 0.00009 |
| carbonic anhydrase VB, mitochondrial                                              | CA5B    | 2.807    | 0.00038 | 0.00446 |
| carbonyl reductase 1                                                              | CBR1    | 1.872    | 0.00037 | 0.00436 |
| carbonyl reductase 3                                                              | CBR3    | 1.607    | 0.00046 | 0.00504 |
| carboxymethylenebutenolidase homolog (Pseudomonas)                                | CMBL    | 1.572    | 0.00008 | 0.00171 |
| carboxypeptidase D                                                                | CPD     | -1.532   | 0.01200 | 0.03929 |
| carboxypeptidase M                                                                | CPM     | -2.581   | 0.03400 | 0.07748 |
| carnitine O-octanoyltransferase                                                   | CROT    | 1.524    | 0.00070 | 0.00652 |
| carnitine palmitoyltransferase 1C                                                 | CPT1C   | 2.402    | 0.00020 | 0.00300 |
| cartilage acidic protein 1                                                        | CRTAC1  | 2.110    | 0.00706 | 0.02823 |
| Cas-Br-M (murine) ecotropic retroviral transforming sequence b                    | CBLB    | -1.757   | 0.00383 | 0.01914 |
| casein kinase 1, alpha 1                                                          | CSNK1A1 | -1.624   | 0.04360 | 0.09034 |
| CASP8 and FADD-like apoptosis regulator                                           | CFLAR   | -1.852   | 0.00247 | 0.01438 |
| caspace 1, apoptosis-related cysteine peptidase (interleukin 1, beta, convertase) | CASP1   | 2.048    | 0.00034 | 0.00414 |
| caspace 2, apoptosis-related cysteine peptidase                                   | CASP2   | 1.583    | 0.00007 | 0.00162 |
| caspace 6, apoptosis-related cysteine peptidase                                   | CASP6   | -1.832   | 0.00099 | 0.00809 |
| caspace 8, apoptosis-related cysteine peptidase                                   | CASP8   | 1.844    | 0.00093 | 0.00780 |
| castor zinc finger 1                                                              | CASZ1   | -5.267   | 0.04030 | 0.08623 |
| cat eye syndrome chromosome region, candidate 5                                   | CECR5   | -1.684   | 0.00092 | 0.00779 |
| cathepsin A                                                                       | CTSA    | 1.513    | 0.00059 | 0.00589 |
| cathepsin C                                                                       | CTSC    | 1.987    | 0.01160 | 0.03843 |
| cathepsin K                                                                       | CTSK    | 1.629    | 0.00419 | 0.02022 |
| cathepsin Z                                                                       | CTSZ    | 1.702    | 0.00638 | 0.02643 |
| caveolin 1, caveolae protein, 22kDa                                               | CAV1    | -2.216   | 0.00258 | 0.01474 |
| caveolin 2                                                                        | CAV2    | -2.122   | 0.02400 | 0.06193 |
| caveolin 3                                                                        | CAV3    | -6.035   | 0.04240 | 0.08892 |
| Cbp/p300-interacting transactivator, with Glu/Asp-rich carboxy-terminal domain, 2 | CITED2  | -2.608   | 0.00974 | 0.03449 |
| CCAAT/enhancer binding protein (C/EBP), beta                                      | CEBPB   | -2.597   | 0.00001 | 0.00037 |
| CCAAT/enhancer binding protein (C/EBP), delta                                     | CEBPD   | -2.615   | 0.00008 | 0.00176 |
| CCR4-NOT transcription complex, subunit 3                                         | CNOT3   | 1.665    | 0.00025 | 0.00343 |

|                                                                                                                    |                            |         |         |         |
|--------------------------------------------------------------------------------------------------------------------|----------------------------|---------|---------|---------|
| CCR4-NOT transcription complex, subunit 8                                                                          | CNOT8                      | -2.005  | 0.00677 | 0.02746 |
| CD109 molecule                                                                                                     | CD109                      | 1.792   | 0.00056 | 0.00573 |
| CD14 molecule                                                                                                      | CD14                       | 4.336   | 0.00000 | 0.00029 |
| CD163 molecule                                                                                                     | CD163                      | -8.375  | 0.00670 | 0.02730 |
| CD163 molecule-like 1                                                                                              | CD163L1                    | 2.315   | 0.00199 | 0.01267 |
| CD200 molecule                                                                                                     | CD200                      | 1.516   | 0.00618 | 0.02593 |
| CD24 molecule                                                                                                      | CD24                       | 4.342   | 0.00065 | 0.00623 |
| CD276 molecule                                                                                                     | CD276                      | 1.732   | 0.00002 | 0.00062 |
| CD28 molecule                                                                                                      | CD28                       | 3.100   | 0.00128 | 0.00954 |
| CD34 molecule                                                                                                      | CD34                       | 1.683   | 0.00072 | 0.00662 |
| CD38 molecule                                                                                                      | CD38                       | -6.756  | 0.00617 | 0.02590 |
| CD44 molecule (Indian blood group)                                                                                 | CD44                       | 1.718   | 0.00302 | 0.01633 |
| CD47 molecule                                                                                                      | CD47                       | 1.594   | 0.02170 | 0.05808 |
| CD69 molecule                                                                                                      | CD69                       | -16.773 | 0.00432 | 0.02062 |
| CD83 molecule                                                                                                      | CD83                       | 3.720   | 0.00000 | 0.00010 |
| CD9 molecule                                                                                                       | CD9                        | -2.677  | 0.01900 | 0.05324 |
| CD93 molecule                                                                                                      | CD93                       | -2.706  | 0.04510 | 0.09228 |
| CDC28 protein kinase regulatory subunit 2                                                                          | CKS2                       | -2.323  | 0.02100 | 0.05688 |
| CDC42 effector protein (Rho GTPase binding) 3                                                                      | CDC42EP3                   | -2.595  | 0.00264 | 0.01496 |
| CDC42 effector protein (Rho GTPase binding) 4                                                                      | CDC42EP4                   | 1.755   | 0.00079 | 0.00703 |
| Cdc42 guanine nucleotide exchange factor (GEF) 9                                                                   | ARHGEF9                    | -5.159  | 0.03200 | 0.07469 |
| CDC5 cell division cycle 5-like (S. pombe)                                                                         | CDC5L                      | -2.058  | 0.03380 | 0.07723 |
| Cdk5 and Abl enzyme substrate 1                                                                                    | CABLES1                    | 1.815   | 0.00052 | 0.00543 |
| CDK5 regulatory subunit associated protein 2                                                                       | CDK5RAP2                   | 1.757   | 0.00556 | 0.02429 |
| Cdon homolog (mouse)                                                                                               | CDON                       | 3.264   | 0.00009 | 0.00187 |
| CDP-diacylglycerol synthase (phosphatidate cytidylyltransferase) 1                                                 | CDS1                       | 3.272   | 0.04850 | 0.09659 |
| CDP-diacylglycerol synthase (phosphatidate cytidylyltransferase) 2                                                 | CDS2                       | -1.787  | 0.00311 | 0.01664 |
| cell adhesion molecule 3                                                                                           | CADM3                      | 1.710   | 0.02100 | 0.05688 |
| cell division cycle 37 homolog (S. cerevisiae)-like 1                                                              | CDC37L1                    | -2.600  | 0.00259 | 0.01478 |
| cell division cycle associated 7-like                                                                              | CDCA7L                     | 1.540   | 0.01590 | 0.04727 |
| cell growth regulator with EF-hand domain 1                                                                        | CGREF1                     | 1.636   | 0.00011 | 0.00207 |
| cellular retinoic acid binding protein 2                                                                           | CRABP2                     | 2.113   | 0.00020 | 0.00300 |
| centrosomal protein 152kDa                                                                                         | CEP152                     | 1.995   | 0.00306 | 0.01646 |
| centrosomal protein 350kDa                                                                                         | CEP350                     | -1.957  | 0.03540 | 0.07942 |
| centrosomal protein 70kDa                                                                                          | CEP70                      | -1.779  | 0.01440 | 0.04432 |
| cerebellar degeneration-related protein 2-like                                                                     | CDR2L                      | 1.550   | 0.00008 | 0.00167 |
| ceroid-lipofuscinosis, neuronal 8 (epilepsy, progressive with mental retardation)                                  | CLN8                       | 1.840   | 0.00063 | 0.00617 |
| ceruloplasmin (ferroxidase)                                                                                        | CP                         | 1.572   | 0.01990 | 0.05490 |
| CGG triplet repeat binding protein 1                                                                               | CGGBP1                     | -2.020  | 0.00009 | 0.00181 |
| ChaC, cation transport regulator homolog 2 (E. coli)                                                               | CHAC2                      | -2.139  | 0.00492 | 0.02251 |
| chaperonin containing TCP1, subunit 2 (beta)                                                                       | CCT2                       | -1.622  | 0.01580 | 0.04710 |
| chaperonin containing TCP1, subunit 8 (theta)                                                                      | CCT8                       | -1.616  | 0.01050 | 0.03614 |
| chemokine (C-C motif) ligand 19                                                                                    | CCL19                      | -10.477 | 0.00260 | 0.01480 |
| chemokine (C-C motif) ligand 3 /// chemokine (C-C motif) ligand 3-like 1 /// chemokine (C-C motif) ligand 3-like 3 | CCL3 /// CCL3L1 /// CCL3L3 | -12.692 | 0.01760 | 0.05063 |
| chemokine (C-C motif) ligand 4                                                                                     | CCL4                       | -5.834  | 0.01500 | 0.04561 |
| chemokine (C-C motif) ligand 5                                                                                     | CCL5                       | -2.706  | 0.01270 | 0.04072 |
| chemokine (C-C motif) receptor-like 1                                                                              | CCRL1                      | 10.850  | 0.00000 | 0.00011 |
| chemokine (C-X3-C motif) ligand 1                                                                                  | CX3CL1                     | 2.240   | 0.00029 | 0.00374 |
| chemokine (C-X3-C motif) receptor 1                                                                                | CX3CR1                     | 7.476   | 0.00057 | 0.00576 |
| chemokine (C-X-C motif) ligand 12 (stromal cell-derived factor 1)                                                  | CXCL12                     | 2.305   | 0.00719 | 0.02850 |



|                                                     |           |        |         |         |
|-----------------------------------------------------|-----------|--------|---------|---------|
| chemokine (C-X-C motif) ligand 14                   | CXCL14    | 4.378  | 0.00300 | 0.01625 |
| chemokine (C-X-C motif) ligand 2                    | CXCL2     | -6.419 | 0.00574 | 0.02478 |
| chemokine (C-X-C motif) ligand 9                    | CXCL9     | -9.119 | 0.01240 | 0.04009 |
| CHK2 checkpoint homolog (S. pombe)                  | CHEK2     | 1.956  | 0.01080 | 0.03676 |
| chloride channel 3                                  | CLCN3     | 1.508  | 0.00018 | 0.00280 |
| chloride channel 4                                  | CLCN4     | 1.675  | 0.00676 | 0.02743 |
| chloride channel accessory 2                        | CLCA2     | 1.505  | 0.04760 | 0.09557 |
| chloride intracellular channel 2                    | CLIC2     | 1.863  | 0.00498 | 0.02264 |
| chloride intracellular channel 3                    | CLIC3     | 3.020  | 0.00047 | 0.00507 |
| chloride intracellular channel 6                    | CLIC6     | 2.554  | 0.00098 | 0.00805 |
| choline dehydrogenase                               | CHDH      | 1.961  | 0.00030 | 0.00381 |
| choline kinase alpha                                | CHKA      | -1.570 | 0.02810 | 0.06847 |
| Choline phosphotransferase 1                        | CHPT1     | -2.588 | 0.04070 | 0.08669 |
| cholinergic receptor, nicotinic, alpha 3            | CHRNA3    | 1.769  | 0.00005 | 0.00131 |
| chondroadherin-like                                 | CHADL     | 1.609  | 0.00238 | 0.01407 |
| chondroitin polymerizing factor 2                   | CHPF2     | 1.560  | 0.00003 | 0.00087 |
| chondroitin sulfate synthase 1                      | CHSY1     | 1.725  | 0.00021 | 0.00306 |
| chondroitin sulfate synthase 3                      | CHSY3     | 2.367  | 0.00001 | 0.00047 |
| chondrolectin                                       | CHODL     | -4.293 | 0.00130 | 0.00963 |
| choroideremia-like (Rab escort protein 2)           | CHML      | -2.220 | 0.00024 | 0.00337 |
| chromatin modifying protein 1B                      | CHMP1B    | -1.721 | 0.00030 | 0.00383 |
| chromobox homolog 4 (Pc class homolog, Drosophila)  | CBX4      | 1.689  | 0.00118 | 0.00907 |
| chromobox homolog 5 (HP1 alpha homolog, Drosophila) | CBX5      | 1.812  | 0.00166 | 0.01125 |
| chromodomain helicase DNA binding protein 1         | CHD1      | -1.609 | 0.00128 | 0.00954 |
| chromosome 1 open reading frame 114                 | C1orf114  | 1.711  | 0.00603 | 0.02553 |
| chromosome 1 open reading frame 133                 | C1orf133  | 3.182  | 0.00001 | 0.00039 |
| chromosome 1 open reading frame 144                 | C1orf144  | -2.319 | 0.03870 | 0.08415 |
| chromosome 1 open reading frame 156                 | C1orf156  | 1.983  | 0.00005 | 0.00129 |
| chromosome 1 open reading frame 162                 | C1orf162  | -4.054 | 0.00011 | 0.00212 |
| chromosome 1 open reading frame 201                 | C1orf201  | 1.620  | 0.00011 | 0.00202 |
| chromosome 1 open reading frame 204                 | C1orf204  | 1.890  | 0.00065 | 0.00626 |
| chromosome 1 open reading frame 212                 | C1orf212  | -1.854 | 0.00519 | 0.02322 |
| chromosome 1 open reading frame 230                 | C1orf230  | -1.582 | 0.03100 | 0.07314 |
| chromosome 1 open reading frame 43                  | C1orf43   | -1.604 | 0.02500 | 0.06357 |
| chromosome 1 open reading frame 71                  | C1orf71   | -1.563 | 0.00008 | 0.00170 |
| chromosome 1 open reading frame 85                  | C1orf85   | 1.847  | 0.00107 | 0.00852 |
| chromosome 1 open reading frame 93                  | C1orf93   | 2.010  | 0.00036 | 0.00430 |
| chromosome 10 open reading frame 10                 | C10orf10  | -2.614 | 0.00841 | 0.03146 |
| chromosome 10 open reading frame 104                | C10orf104 | -1.631 | 0.00475 | 0.02200 |
| chromosome 10 open reading frame 140                | C10orf140 | 1.912  | 0.00007 | 0.00166 |
| chromosome 11 open reading frame 1                  | C11orf1   | -1.997 | 0.04140 | 0.08751 |
| chromosome 11 open reading frame 24                 | C11orf24  | 1.872  | 0.00001 | 0.00058 |
| chromosome 11 open reading frame 70                 | C11orf70  | 1.650  | 0.02040 | 0.05581 |
| chromosome 11 open reading frame 80                 | C11orf80  | 4.422  | 0.00003 | 0.00092 |
| chromosome 11 open reading frame 83                 | C11orf83  | 1.508  | 0.00006 | 0.00138 |
| chromosome 11 open reading frame 87                 | C11orf87  | 2.215  | 0.00473 | 0.02192 |
| chromosome 12 open reading frame 29                 | C12orf29  | -1.615 | 0.00257 | 0.01472 |
| chromosome 12 open reading frame 32                 | C12orf32  | 1.722  | 0.00018 | 0.00281 |
| chromosome 12 open reading frame 62                 | C12orf62  | -1.921 | 0.04750 | 0.09543 |
| chromosome 12 open reading frame 73                 | C12orf73  | 1.698  | 0.00001 | 0.00057 |
| chromosome 12 open reading frame 75                 | C12orf75  | -6.086 | 0.02440 | 0.06258 |

|                                      |           |        |         |         |
|--------------------------------------|-----------|--------|---------|---------|
| Chromosome 13 open reading frame 15  | C13orf15  | -7.238 | 0.01010 | 0.03532 |
| chromosome 13 open reading frame 18  | C13orf18  | 2.079  | 0.00949 | 0.03397 |
| chromosome 13 open reading frame 26  | C13orf26  | 1.583  | 0.00001 | 0.00042 |
| Chromosome 13 open reading frame 33  | C13orf33  | -1.699 | 0.01130 | 0.03781 |
| chromosome 14 open reading frame 106 | C14orf106 | -1.963 | 0.01450 | 0.04451 |
| chromosome 14 open reading frame 132 | C14orf132 | 1.845  | 0.00953 | 0.03403 |
| chromosome 14 open reading frame 50  | C14orf50  | 2.954  | 0.00006 | 0.00144 |
| chromosome 14 open reading frame 64  | C14orf64  | 1.526  | 0.00233 | 0.01387 |
| chromosome 14 open reading frame 82  | C14orf82  | 1.657  | 0.00246 | 0.01434 |
| chromosome 15 open reading frame 59  | C15orf59  | 1.567  | 0.04040 | 0.08636 |
| chromosome 16 open reading frame 61  | C16orf61  | -2.209 | 0.03610 | 0.08054 |
| chromosome 17 open reading frame 57  | C17orf57  | -2.663 | 0.03990 | 0.08571 |
| chromosome 17 open reading frame 76  | C17orf76  | 2.271  | 0.00001 | 0.00041 |
| chromosome 17 open reading frame 81  | C17orf81  | 1.728  | 0.04240 | 0.08892 |
| chromosome 17 open reading frame 91  | C17orf91  | -2.892 | 0.00000 | 0.00010 |
| chromosome 18 open reading frame 19  | C18orf19  | -1.896 | 0.03890 | 0.08445 |
| chromosome 18 open reading frame 8   | C18orf8   | -1.569 | 0.00003 | 0.00096 |
| chromosome 2 open reading frame 27A  | C2orf27A  | 2.284  | 0.00306 | 0.01646 |
| chromosome 2 open reading frame 49   | C2orf49   | -1.952 | 0.00546 | 0.02404 |
| chromosome 2 open reading frame 67   | C2orf67   | -1.898 | 0.00042 | 0.00474 |
| chromosome 2 open reading frame 88   | C2orf88   | 2.091  | 0.01100 | 0.03720 |
| chromosome 20 open reading frame 111 | C20orf111 | -1.576 | 0.00005 | 0.00133 |
| chromosome 20 open reading frame 112 | C20orf112 | 2.538  | 0.00000 | 0.00018 |
| chromosome 20 open reading frame 199 | C20orf199 | -1.645 | 0.00069 | 0.00648 |
| chromosome 20 open reading frame 7   | C20orf7   | -2.017 | 0.01120 | 0.03762 |
| chromosome 21 open reading frame 62  | C21orf62  | 12.578 | 0.00192 | 0.01240 |
| chromosome 22 open reading frame 29  | C22orf29  | 1.609  | 0.00000 | 0.00022 |
| chromosome 22 open reading frame 32  | C22orf32  | -1.632 | 0.00034 | 0.00414 |
| chromosome 22 open reading frame 9   | C22orf9   | 2.044  | 0.00014 | 0.00243 |
| chromosome 3 open reading frame 14   | C3orf14   | 1.657  | 0.00000 | 0.00013 |
| chromosome 3 open reading frame 21   | C3orf21   | 2.181  | 0.00018 | 0.00279 |
| chromosome 3 open reading frame 34   | C3orf34   | 1.678  | 0.00188 | 0.01220 |
| chromosome 3 open reading frame 64   | C3orf64   | -1.744 | 0.00242 | 0.01423 |
| chromosome 3 open reading frame 67   | C3orf67   | 1.838  | 0.00005 | 0.00135 |
| chromosome 4 open reading frame 16   | C4orf16   | -1.666 | 0.01780 | 0.05103 |
| chromosome 4 open reading frame 31   | C4orf31   | 3.174  | 0.02640 | 0.06588 |
| chromosome 4 open reading frame 32   | C4orf32   | -2.482 | 0.00030 | 0.00380 |
| chromosome 4 open reading frame 47   | C4orf47   | 1.829  | 0.00083 | 0.00724 |
| chromosome 4 open reading frame 48   | C4orf48   | 2.132  | 0.00003 | 0.00090 |
| chromosome 4 open reading frame 49   | C4orf49   | 2.393  | 0.00061 | 0.00604 |
| chromosome 5 open reading frame 13   | C5orf13   | 3.136  | 0.00219 | 0.01340 |
| chromosome 5 open reading frame 23   | C5orf23   | -6.946 | 0.00255 | 0.01464 |
| chromosome 5 open reading frame 26   | C5orf26   | -1.681 | 0.00769 | 0.02972 |
| chromosome 5 open reading frame 33   | C5orf33   | -1.975 | 0.00068 | 0.00646 |
| chromosome 5 open reading frame 46   | C5orf46   | 4.771  | 0.00071 | 0.00661 |
| chromosome 5 open reading frame 54   | C5orf54   | 1.820  | 0.00091 | 0.00772 |
| chromosome 5 open reading frame 55   | C5orf55   | 1.653  | 0.00061 | 0.00604 |
| chromosome 6 open reading frame 105  | C6orf105  | 2.735  | 0.00158 | 0.01090 |
| chromosome 6 open reading frame 115  | C6orf115  | 1.919  | 0.00034 | 0.00418 |
| chromosome 6 open reading frame 170  | C6orf170  | 1.624  | 0.00114 | 0.00890 |
| chromosome 6 open reading frame 226  | C6orf226  | 1.502  | 0.00002 | 0.00075 |

|                                                                                        |                        |         |         |         |
|----------------------------------------------------------------------------------------|------------------------|---------|---------|---------|
| chromosome 6 open reading frame 64                                                     | C6orf64                | 1.864   | 0.00030 | 0.00382 |
| chromosome 7 open reading frame 41                                                     | C7orf41                | -2.083  | 0.00007 | 0.00154 |
| chromosome 7 open reading frame 44                                                     | C7orf44                | 3.675   | 0.00001 | 0.00032 |
| chromosome 7 open reading frame 55                                                     | C7orf55                | -1.760  | 0.00106 | 0.00846 |
| chromosome 7 open reading frame 58                                                     | C7orf58                | -2.012  | 0.01290 | 0.04114 |
| chromosome 7 open reading frame 68                                                     | C7orf68                | 1.916   | 0.00136 | 0.00990 |
| chromosome 8 open reading frame 31                                                     | C8orf31                | 1.561   | 0.00013 | 0.00232 |
| chromosome 8 open reading frame 4                                                      | C8orf4                 | -2.007  | 0.00633 | 0.02630 |
| chromosome 8 open reading frame 46                                                     | C8orf46                | -1.794  | 0.00631 | 0.02626 |
| chromosome 8 open reading frame 48                                                     | C8orf48                | 1.908   | 0.00420 | 0.02026 |
| chromosome 8 open reading frame 49                                                     | C8orf49                | 2.091   | 0.00685 | 0.02765 |
| chromosome 8 open reading frame 84                                                     | C8orf84                | -23.808 | 0.04170 | 0.08797 |
| Chromosome 9 open reading frame 3                                                      | C9orf3                 | 1.847   | 0.00757 | 0.02947 |
| chromosome 9 open reading frame 30                                                     | C9orf30                | 1.545   | 0.00122 | 0.00926 |
| chromosome 9 open reading frame 5                                                      | C9orf5                 | -1.888  | 0.00000 | 0.00029 |
| chromosome 9 open reading frame 72                                                     | C9orf72                | -2.093  | 0.00044 | 0.00491 |
| chromosome X open reading frame 39                                                     | CXorf39                | -3.227  | 0.00078 | 0.00695 |
| churchill domain containing 1                                                          | CHURC1                 | -1.661  | 0.00146 | 0.01039 |
| cingulin-like 1                                                                        | CGNL1                  | 1.707   | 0.00151 | 0.01062 |
| citron (rho-interacting, serine/threonine kinase 21)                                   | CIT                    | 1.551   | 0.00048 | 0.00520 |
| CKLF-like MARVEL transmembrane domain containing 5                                     | CMTM5                  | 1.623   | 0.00321 | 0.01702 |
| claudin 1                                                                              | CLDN1                  | 4.269   | 0.00017 | 0.00269 |
| claudin 23                                                                             | CLDN23                 | 1.708   | 0.01830 | 0.05201 |
| claudin domain containing 1                                                            | CLDND1                 | -2.352  | 0.00956 | 0.03409 |
| cleavage stimulation factor, 3' pre-RNA, subunit 3, 77kDa                              | CSTF3                  | 1.561   | 0.00631 | 0.02626 |
| clusterin                                                                              | CLU                    | 1.560   | 0.00270 | 0.01517 |
| c-mer proto-oncogene tyrosine kinase                                                   | MERTK                  | -2.842  | 0.00058 | 0.00584 |
| CMT1A duplicated region transcript 4 /// family with sequence similarity 18, member B2 | CDRT4 ///<br>FAM18B2   | 1.670   | 0.00028 | 0.00362 |
| c-myc binding protein                                                                  | MYCBP                  | -1.790  | 0.04970 | 0.09810 |
| coagulation factor C homolog, coxlin (Limulus polyphemus)                              | COCH                   | -1.631  | 0.02540 | 0.06425 |
| coagulation factor II (thrombin) receptor-like 1                                       | F2RL1                  | 1.762   | 0.02700 | 0.06680 |
| coagulation factor V (proaccelerin, labile factor)                                     | F5                     | 4.356   | 0.00016 | 0.00258 |
| coenzyme Q2 homolog, prenyltransferase (yeast)                                         | COQ2                   | -1.755  | 0.03890 | 0.08445 |
| cofilin 2 (muscle)                                                                     | CFL2                   | -3.134  | 0.01720 | 0.04983 |
| coiled-coil and C2 domain containing 2A                                                | CC2D2A                 | 1.563   | 0.00672 | 0.02735 |
| coiled-coil domain containing 102A                                                     | CCDC102A               | 1.567   | 0.00330 | 0.01731 |
| coiled-coil domain containing 113                                                      | CCDC113                | 1.656   | 0.00134 | 0.00981 |
| coiled-coil domain containing 121                                                      | CCDC121                | 1.728   | 0.00115 | 0.00894 |
| coiled-coil domain containing 141                                                      | CCDC141                | 1.993   | 0.01150 | 0.03823 |
| coiled-coil domain containing 142                                                      | CCDC142                | 1.531   | 0.00316 | 0.01683 |
| coiled-coil domain containing 151                                                      | CCDC151                | 1.707   | 0.01490 | 0.04540 |
| coiled-coil domain containing 28B                                                      | CCDC28B                | 2.008   | 0.00006 | 0.00147 |
| coiled-coil domain containing 3                                                        | CCDC3                  | -2.644  | 0.02670 | 0.06637 |
| coiled-coil domain containing 34                                                       | CCDC34                 | 2.358   | 0.00042 | 0.00473 |
| coiled-coil domain containing 68                                                       | CCDC68                 | -1.647  | 0.01680 | 0.04903 |
| coiled-coil domain containing 74A /// coiled-coil domain containing 74B                | CCDC74A ///<br>CCDC74B | 1.640   | 0.00007 | 0.00159 |
| coiled-coil domain containing 8                                                        | CCDC8                  | 2.440   | 0.00002 | 0.00080 |
| coiled-coil domain containing 80                                                       | CCDC80                 | 2.428   | 0.00018 | 0.00279 |
| coiled-coil domain containing 89                                                       | CCDC89                 | 2.339   | 0.00003 | 0.00090 |
| coiled-coil domain containing 90B                                                      | CCDC90B                | 1.717   | 0.00024 | 0.00335 |

|                                                                                        |            |         |         |         |
|----------------------------------------------------------------------------------------|------------|---------|---------|---------|
| cold inducible RNA binding protein                                                     | CIRBP      | 1.730   | 0.02200 | 0.05858 |
| cold shock domain containing C2, RNA binding                                           | CSDC2      | -3.928  | 0.00619 | 0.02595 |
| cold shock domain protein A                                                            | CSDA       | -1.636  | 0.00445 | 0.02101 |
| collagen triple helix repeat containing 1                                              | CTHRC1     | 2.103   | 0.00245 | 0.01431 |
| collagen, type I, alpha 1                                                              | COL1A1     | 3.263   | 0.00033 | 0.00404 |
| collagen, type I, alpha 2                                                              | COL1A2     | 1.891   | 0.00167 | 0.01128 |
| collagen, type III, alpha 1                                                            | COL3A1     | 1.986   | 0.00038 | 0.00446 |
| collagen, type IV, alpha 1                                                             | COL4A1     | -1.734  | 0.02020 | 0.05546 |
| collagen, type IV, alpha 2                                                             | COL4A2     | -4.726  | 0.03590 | 0.08028 |
| collagen, type IV, alpha 6                                                             | COL4A6     | -12.752 | 0.03070 | 0.07266 |
| collagen, type IX, alpha 2                                                             | COL9A2     | 2.104   | 0.00117 | 0.00904 |
| collagen, type V, alpha 1                                                              | COL5A1     | 3.006   | 0.00097 | 0.00800 |
| collagen, type V, alpha 2                                                              | COL5A2     | 1.874   | 0.00122 | 0.00926 |
| collagen, type V, alpha 3                                                              | COL5A3     | -1.523  | 0.04330 | 0.09004 |
| collagen, type VI, alpha 1                                                             | COL6A1     | 1.556   | 0.00081 | 0.00717 |
| collagen, type VIII, alpha 1                                                           | COL8A1     | 2.635   | 0.00358 | 0.01832 |
| collagen, type VIII, alpha 2                                                           | COL8A2     | 1.785   | 0.00302 | 0.01633 |
| collagen, type XII, alpha 1                                                            | COL12A1    | 1.657   | 0.01530 | 0.04618 |
| collagen, type XIII, alpha 1                                                           | COL13A1    | 1.883   | 0.02070 | 0.05639 |
| collagen, type XV, alpha 1                                                             | COL15A1    | 2.475   | 0.00001 | 0.00051 |
| collagen, type XXVII, alpha 1                                                          | COL27A1    | -3.364  | 0.00599 | 0.02542 |
| colony stimulating factor 2 receptor, alpha, low-affinity (granulocyte-macrophage)     | CSF2RA     | -1.559  | 0.00335 | 0.01752 |
| complement component 2                                                                 | C2         | 2.275   | 0.00099 | 0.00811 |
| complement component 2 /// complement factor B                                         | C2 /// CFB | 1.529   | 0.03400 | 0.07748 |
| complement component 7                                                                 | C7         | -1.936  | 0.01940 | 0.05399 |
| complement factor I                                                                    | CFI        | 2.479   | 0.02720 | 0.06705 |
| contactin 4                                                                            | CNTN4      | -4.756  | 0.03890 | 0.08445 |
| contactin associated protein 1                                                         | CNTNAP1    | 2.145   | 0.00000 | 0.00009 |
| core 1 synthase, glycoprotein-N-acetylgalactosamine 3-beta-galactosyltransferase, 1    | C1GALT1    | 2.082   | 0.00015 | 0.00250 |
| coronin 6                                                                              | CORO6      | -3.353  | 0.00005 | 0.00129 |
| coronin, actin binding protein, 2A                                                     | CORO2A     | 1.643   | 0.00889 | 0.03267 |
| coronin, actin binding protein, 2B                                                     | CORO2B     | 3.072   | 0.00001 | 0.00059 |
| crystallin, alpha B                                                                    | CRYAB      | -2.341  | 0.00481 | 0.02219 |
| CSRP2 binding protein                                                                  | CSRP2BP    | -1.534  | 0.01350 | 0.04247 |
| CTD (carboxy-terminal domain, RNA polymerase II, polypeptide A) small phosphatase-like | CTDSPL     | -1.601  | 0.00058 | 0.00580 |
| CTP synthase                                                                           | CTPS       | -9.726  | 0.00000 | 0.00006 |
| C-type lectin domain family 11, member A                                               | CLEC11A    | 1.891   | 0.00699 | 0.02804 |
| C-type lectin domain family 2, member B                                                | CLEC2B     | 3.867   | 0.00148 | 0.01047 |
| C-type lectin domain family 4, member E                                                | CLEC4E     | -4.289  | 0.00010 | 0.00196 |
| CUB and Sushi multiple domains 2                                                       | CSMD2      | 2.213   | 0.00043 | 0.00477 |
| cubilin (intrinsic factor-cobalamin receptor)                                          | CUBN       | 1.805   | 0.00683 | 0.02760 |
| CUG triplet repeat, RNA binding protein 2                                              | CUGBP2     | -4.718  | 0.01060 | 0.03634 |
| Cullin 1                                                                               | CUL1       | -1.738  | 0.00000 | 0.00009 |
| cullin 3                                                                               | CUL3       | -1.661  | 0.00069 | 0.00648 |
| CXXC finger 5                                                                          | CXXC5      | 2.591   | 0.00016 | 0.00257 |
| cyclin B1 interacting protein 1                                                        | CCNB1IP1   | -1.679  | 0.00303 | 0.01637 |
| cyclin D1                                                                              | CCND1      | 1.811   | 0.00008 | 0.00176 |
| cyclin D2                                                                              | CCND2      | 1.603   | 0.01380 | 0.04312 |
| cyclin D3                                                                              | CCND3      | -2.022  | 0.00615 | 0.02588 |
| cyclin E2                                                                              | CCNE2      | -1.826  | 0.03040 | 0.07216 |

|                                                                              |          |         |         |         |
|------------------------------------------------------------------------------|----------|---------|---------|---------|
| cyclin G2                                                                    | CCNG2    | -1.704  | 0.00042 | 0.00476 |
| cyclin J-like                                                                | CCNJL    | 1.564   | 0.00000 | 0.00008 |
| cyclin L1                                                                    | CCNL1    | -1.848  | 0.00096 | 0.00797 |
| cyclin-dependent kinase 2 associated protein 1                               | CDK2AP1  | 1.587   | 0.00000 | 0.00018 |
| cyclin-dependent kinase 2 associated protein 2                               | CDK2AP2  | -1.588  | 0.02660 | 0.06620 |
| cyclin-dependent kinase 6                                                    | CDK6     | 2.121   | 0.00070 | 0.00651 |
| cyclin-dependent kinase inhibitor 1A (p21, Cip1)                             | CDKN1A   | -1.952  | 0.00034 | 0.00417 |
| cyclin-dependent kinase inhibitor 1C (p57, Kip2)                             | CDKN1C   | -1.542  | 0.04020 | 0.08609 |
| cyclin-dependent kinase inhibitor 2A (melanoma, p16, inhibits CDK4)          | CDKN2A   | 1.726   | 0.00528 | 0.02345 |
| cyclin-dependent kinase inhibitor 2B (p15, inhibits CDK4)                    | CDKN2B   | 4.153   | 0.00617 | 0.02590 |
| cystathionase (cystathionine gamma-lyase)                                    | CTH      | -2.860  | 0.00808 | 0.03069 |
| cysteine and glycine-rich protein 1                                          | CSRP1    | -4.190  | 0.03170 | 0.07425 |
| cysteine and glycine-rich protein 2                                          | CSRP2    | -5.148  | 0.00035 | 0.00420 |
| cysteine and histidine-rich domain (CHORD)-containing 1                      | CHORDC1  | -1.821  | 0.00027 | 0.00360 |
| cysteine-rich hydrophobic domain 2                                           | CHIC2    | -1.625  | 0.00753 | 0.02935 |
| cysteine-rich secretory protein LCCL domain containing 1                     | CRISPLD1 | 1.839   | 0.00057 | 0.00578 |
| cysteine-rich, angiogenic inducer, 61                                        | CYR61    | -2.981  | 0.00008 | 0.00167 |
| cysteine-serine-rich nuclear protein 1                                       | CSRNP1   | -4.055  | 0.00000 | 0.00026 |
| cysteine-serine-rich nuclear protein 3                                       | CSRNP3   | 1.626   | 0.00714 | 0.02839 |
| cystin 1                                                                     | CYS1     | 2.498   | 0.00003 | 0.00087 |
| cytidine deaminase                                                           | CDA      | 1.654   | 0.00121 | 0.00921 |
| cytidine monophosphate (UMP-CMP) kinase 2, mitochondrial                     | CMPK2    | 2.242   | 0.00029 | 0.00378 |
| cytochrome b-245, beta polypeptide                                           | CYBB     | 2.133   | 0.02990 | 0.07135 |
| cytochrome b-561                                                             | CYB561   | 2.118   | 0.00000 | 0.00009 |
| cytochrome b-561 domain containing 2                                         | CYB561D2 | 1.535   | 0.00759 | 0.02950 |
| cytochrome c oxidase subunit VIIc                                            | COX7C    | -1.530  | 0.03040 | 0.07216 |
| cytochrome c, somatic                                                        | CYCS     | -3.835  | 0.00510 | 0.02296 |
| cytochrome P450, family 1, subfamily B, polypeptide 1                        | CYP1B1   | 1.649   | 0.00653 | 0.02686 |
| cytochrome P450, family 2, subfamily R, polypeptide 1                        | CYP2R1   | 1.607   | 0.00157 | 0.01086 |
| cytochrome P450, family 27, subfamily C, polypeptide 1                       | CYP27C1  | 2.027   | 0.02770 | 0.06779 |
| cytochrome P450, family 39, subfamily A, polypeptide 1                       | CYP39A1  | 1.835   | 0.01720 | 0.04983 |
| cytochrome P450, family 4, subfamily B, polypeptide 1                        | CYP4B1   | -30.142 | 0.00522 | 0.02330 |
| cytochrome P450, family 4, subfamily V, polypeptide 2                        | CYP4V2   | 1.582   | 0.00014 | 0.00239 |
| cytohesin 1 interacting protein                                              | CYTIP    | -3.948  | 0.00118 | 0.00907 |
| cytohesin 4                                                                  | CYTH4    | 1.641   | 0.01280 | 0.04091 |
| cytoplasmic FMR1 interacting protein 2                                       | CYFIP2   | -11.394 | 0.01700 | 0.04945 |
| cytoplasmic polyadenylation element binding protein 1                        | CPEB1    | 3.359   | 0.00001 | 0.00055 |
| cytoplasmic polyadenylation element binding protein 4                        | CPEB4    | -3.180  | 0.00526 | 0.02340 |
| cytoskeleton-associated protein 4                                            | CKAP4    | 1.558   | 0.00014 | 0.00240 |
| D site of albumin promoter (albumin D-box) binding protein                   | DBP      | 4.033   | 0.00009 | 0.00181 |
| DAB2 interacting protein                                                     | DAB2IP   | 1.668   | 0.01300 | 0.04135 |
| dachsous 1 (Drosophila)                                                      | DCHS1    | 1.612   | 0.00010 | 0.00195 |
| DALR anticodon binding domain containing 3                                   | DALRD3   | 1.754   | 0.00000 | 0.00003 |
| damage-specific DNA binding protein 2, 48kDa                                 | DDB2     | 2.610   | 0.00034 | 0.00418 |
| dapper, antagonist of beta-catenin, homolog 2 (Xenopus laevis)               | DACT2    | 3.239   | 0.00599 | 0.02542 |
| DCN1, defective in cullin neddylation 1, domain containing 3 (S. cerevisiae) | DCUN1D3  | -1.981  | 0.00130 | 0.00963 |
| DCP1 decapping enzyme homolog B (S. cerevisiae)                              | DCP1B    | 1.548   | 0.00221 | 0.01346 |
| D-dopachrome tautomerase                                                     | DDT      | -2.040  | 0.00004 | 0.00104 |
| DEAD (Asp-Glu-Ala-Asp) box polypeptide 3, X-linked                           | DDX3X    | -1.800  | 0.01530 | 0.04618 |
| DEAD (Asp-Glu-Ala-Asp) box polypeptide 58                                    | DDX58    | 1.813   | 0.00739 | 0.02903 |
| death-associated protein                                                     | DAP      | 1.717   | 0.00002 | 0.00082 |

|                                                                             |                    |         |         |         |
|-----------------------------------------------------------------------------|--------------------|---------|---------|---------|
| death-associated protein kinase 2                                           | DAPK2              | -3.310  | 0.00769 | 0.02972 |
| debranching enzyme homolog 1 ( <i>S. cerevisiae</i> )                       | DBR1               | 1.589   | 0.00073 | 0.00668 |
| dedicator of cytokinesis 3                                                  | DOCK3              | -2.049  | 0.03580 | 0.08014 |
| Dedicator of cytokinesis 5                                                  | DOCK5              | -2.124  | 0.01620 | 0.04786 |
| dedicator of cytokinesis 7                                                  | DOCK7              | 1.528   | 0.00019 | 0.00289 |
| defective in sister chromatid cohesion 1 homolog ( <i>S. cerevisiae</i> )   | DSCC1              | 1.689   | 0.00031 | 0.00393 |
| dehydrogenase E1 and transketolase domain containing 1                      | DHTKD1             | -1.919  | 0.00129 | 0.00958 |
| dehydrogenase/reductase (SDR family) member 13                              | DHRS13             | 1.581   | 0.00001 | 0.00047 |
| deiodinase, iodothyronine, type II                                          | DIO2               | 2.459   | 0.00000 | 0.00023 |
| deleted in bladder cancer 1                                                 | DBC1               | 2.536   | 0.00352 | 0.01812 |
| deltex 3-like ( <i>Drosophila</i> )                                         | DTX3L              | 1.581   | 0.00041 | 0.00471 |
| DENN/MADD domain containing 1B                                              | DENND1B            | 1.994   | 0.00040 | 0.00464 |
| DENN/MADD domain containing 2A                                              | DENND2A            | 1.965   | 0.00001 | 0.00049 |
| deoxythymidylate kinase (thymidylate kinase)                                | DTYMK              | 1.512   | 0.00014 | 0.00238 |
| DEP domain containing 7                                                     | DEPDC7             | 3.412   | 0.00002 | 0.00063 |
| desmin                                                                      | DES                | -94.915 | 0.01040 | 0.03593 |
| desmin /// family with sequence similarity 48, member A                     | DES /// FAM48A     | -52.095 | 0.01090 | 0.03700 |
| destrin (actin depolymerizing factor)                                       | DSTN               | -2.401  | 0.01100 | 0.03720 |
| diaphanous homolog 2 ( <i>Drosophila</i> )                                  | DIAPH2             | -1.816  | 0.01280 | 0.04091 |
| dicarbonyl/L-xylulose reductase                                             | DCXR               | -2.579  | 0.00178 | 0.01173 |
| dihydrofolate reductase                                                     | DHFR               | 1.508   | 0.01210 | 0.03950 |
| dihydrofolate reductase-like 1                                              | DHFRL1             | 1.622   | 0.00380 | 0.01904 |
| dihydrolipoamide branched chain transacylase E2                             | DBT                | -1.962  | 0.00124 | 0.00936 |
| dihydrolipoamide dehydrogenase                                              | DLD                | -1.575  | 0.00206 | 0.01294 |
| dihydropyrimidinase-like 3                                                  | DPYSL3             | 2.049   | 0.00000 | 0.00025 |
| DIM1 dimethyladenosine transferase 1-like ( <i>S. cerevisiae</i> )          | DIMT1L             | -1.682  | 0.00000 | 0.00014 |
| dimethylarginine dimethylaminohydrolase 2                                   | DDAH2              | 1.507   | 0.00051 | 0.00537 |
| disabled homolog 1 ( <i>Drosophila</i> )                                    | DAB1               | -37.200 | 0.01970 | 0.05447 |
| disabled homolog 2, mitogen-responsive phosphoprotein ( <i>Drosophila</i> ) | DAB2               | 2.100   | 0.00002 | 0.00077 |
| discoidin, CUB and LCCL domain containing 1                                 | DCBLD1             | 1.707   | 0.03320 | 0.07640 |
| discs, large homolog 3 ( <i>Drosophila</i> )                                | DLG3               | 1.626   | 0.00163 | 0.01112 |
| dishevelled associated activator of morphogenesis 2                         | DAAM2              | -1.592  | 0.02180 | 0.05821 |
| disrupted in renal carcinoma 2                                              | DIRC2              | -1.531  | 0.04550 | 0.09277 |
| DIX domain containing 1                                                     | DIXDC1             | 1.558   | 0.00198 | 0.01262 |
| DKFZp451A211 protein                                                        | DKFZp451A211       | -4.236  | 0.04900 | 0.09729 |
| Dmx-like 2                                                                  | DMXL2              | 1.586   | 0.00281 | 0.01557 |
| DNA fragmentation factor, 40kDa, beta polypeptide (caspase-activated DNase) | DFFB               | 1.688   | 0.00056 | 0.00571 |
| DNA-damage-inducible transcript 4                                           | DDIT4              | -9.198  | 0.00000 | 0.00030 |
| DNA-damage-inducible transcript 4-like                                      | DDIT4L             | 2.227   | 0.01690 | 0.04924 |
| DnaJ (Hsp40) homolog, subfamily A, member 4                                 | DNAJA4             | -4.403  | 0.04740 | 0.09533 |
| DnaJ (Hsp40) homolog, subfamily B, member 4                                 | DNAJB4             | -3.037  | 0.00007 | 0.00157 |
| DnaJ (Hsp40) homolog, subfamily B, member 5                                 | DNAJB5             | -9.190  | 0.00792 | 0.03028 |
| DnaJ (Hsp40) homolog, subfamily B, member 6 /// transmembrane protein 135   | DNAJB6 /// TMEM135 | -1.682  | 0.00006 | 0.00151 |
| DnaJ (Hsp40) homolog, subfamily C, member 10                                | DNAJC10            | 1.528   | 0.00253 | 0.01458 |
| DnaJ (Hsp40) homolog, subfamily C, member 12                                | DNAJC12            | -1.561  | 0.01530 | 0.04618 |
| DnaJ (Hsp40) homolog, subfamily C, member 21                                | DNAJC21            | -1.516  | 0.02960 | 0.07084 |
| DnaJ (Hsp40) homolog, subfamily C, member 22                                | DNAJC22            | 1.518   | 0.01430 | 0.04411 |
| docking protein 4                                                           | DOK4               | 1.559   | 0.00063 | 0.00617 |
| docking protein 5                                                           | DOK5               | 2.670   | 0.00020 | 0.00296 |
| dolichol kinase                                                             | DOLK               | 1.523   | 0.00000 | 0.00009 |

|                                                                                                |                  |         |         |         |
|------------------------------------------------------------------------------------------------|------------------|---------|---------|---------|
| dopey family member 2                                                                          | DOPEY2           | 1.584   | 0.00003 | 0.00097 |
| doublecortin-like kinase 1                                                                     | DCLK1            | 1.884   | 0.01850 | 0.05236 |
| DPH3, KTI11 homolog (S. cerevisiae)                                                            | DPH3             | -2.271  | 0.00056 | 0.00573 |
| drebrin 1                                                                                      | DBN1             | 2.496   | 0.00098 | 0.00805 |
| dual oxidase 1                                                                                 | DUOX1            | 1.889   | 0.00081 | 0.00717 |
| dual specificity phosphatase 1                                                                 | DUSP1            | -3.514  | 0.00000 | 0.00002 |
| dual specificity phosphatase 18                                                                | DUSP18           | 1.777   | 0.00050 | 0.00534 |
| dual specificity phosphatase 3                                                                 | DUSP3            | -4.941  | 0.04310 | 0.08982 |
| dual specificity phosphatase 5                                                                 | DUSP5            | -10.551 | 0.02390 | 0.06178 |
| dual specificity phosphatase 7                                                                 | DUSP7            | 1.529   | 0.00018 | 0.00279 |
| dual-specificity tyrosine-(Y)-phosphorylation regulated kinase 2                               | DYRK2            | 1.713   | 0.00690 | 0.02776 |
| dynamin 1                                                                                      | DNM1             | 2.224   | 0.00088 | 0.00753 |
| dynamin 1-like                                                                                 | DNM1L            | -1.760  | 0.00137 | 0.00994 |
| dynein, axonemal, heavy chain 5                                                                | DNAH5            | 1.610   | 0.00053 | 0.00550 |
| dyslexia susceptibility 1 candidate 1                                                          | DYX1C1           | 2.123   | 0.00162 | 0.01108 |
| dystrobrevin, alpha                                                                            | DTNA             | -3.134  | 0.03100 | 0.07314 |
| E2F transcription factor 3                                                                     | E2F3             | -2.038  | 0.00325 | 0.01716 |
| E74-like factor 1 (ets domain transcription factor)                                            | ELF1             | -1.844  | 0.04030 | 0.08623 |
| early B-cell factor 3                                                                          | EBF3             | 2.699   | 0.00074 | 0.00672 |
| Early growth response 1                                                                        | EGR1             | -3.482  | 0.00029 | 0.00377 |
| early growth response 3                                                                        | EGR3             | -7.280  | 0.00005 | 0.00124 |
| echinoderm microtubule associated protein like 1                                               | EML1             | 2.447   | 0.00008 | 0.00174 |
| ectonucleoside triphosphate diphosphohydrolase 1                                               | ENTPD1           | -11.764 | 0.00662 | 0.02710 |
| EF-hand calcium binding domain 2                                                               | EFCAB2           | -2.208  | 0.00126 | 0.00945 |
| EF-hand domain (C-terminal) containing 1                                                       | EFHC1            | 1.552   | 0.01600 | 0.04748 |
| EF-hand domain family, member A2                                                               | EFHA2            | -1.536  | 0.00309 | 0.01657 |
| EF-hand domain family, member D1                                                               | EFHD1            | -13.945 | 0.00096 | 0.00795 |
| EGF-like-domain, multiple 7                                                                    | EGFL7            | -2.082  | 0.01330 | 0.04210 |
| elaC homolog 1 (E. coli)                                                                       | ELAC1            | 1.506   | 0.00657 | 0.02697 |
| elastin microfibril interfacier 3                                                              | EMILIN3          | 2.075   | 0.00769 | 0.02972 |
| electron-transfer-flavoprotein, alpha polypeptide                                              | ETFA             | -1.607  | 0.02290 | 0.06004 |
| electron-transferring-flavoprotein dehydrogenase                                               | ETFDH            | -2.046  | 0.02120 | 0.05716 |
| ELK1, member of ETS oncogene family                                                            | ELK1             | -1.655  | 0.00708 | 0.02826 |
| ELK3, ETS-domain protein (SRF accessory protein 2)                                             | ELK3             | 1.657   | 0.00310 | 0.01660 |
| Ellis van Creveld syndrome                                                                     | EVC              | 1.593   | 0.00312 | 0.01667 |
| elongation factor RNA polymerase II-like 3 /// serine incorporator 4                           | ELL3 /// SERINC4 | 3.020   | 0.00000 | 0.00009 |
| elongation factor, RNA polymerase II, 2                                                        | ELL2             | -2.223  | 0.00002 | 0.00061 |
| elongation of very long chain fatty acids (FEN1/Elo2, SUR4/Elo3, yeast)-like 4                 | ELOVL4           | 1.682   | 0.01070 | 0.03655 |
| ELOVL family member 6, elongation of long chain fatty acids (FEN1/Elo2, SUR4/Elo3-like, yeast) | ELOVL6           | 1.644   | 0.00003 | 0.00097 |
| empty spiracles homeobox 2                                                                     | EMX2             | 2.969   | 0.01220 | 0.03971 |
| EMX2 opposite strand (non-protein coding)                                                      | EMX2OS           | 1.597   | 0.02970 | 0.07100 |
| endothelial cell adhesion molecule                                                             | ESAM             | -3.898  | 0.00411 | 0.01997 |
| endothelin 1                                                                                   | EDN1             | -4.750  | 0.04630 | 0.09383 |
| endothelin receptor type A                                                                     | EDNRA            | -54.901 | 0.00868 | 0.03215 |
| endothelin receptor type B                                                                     | EDNRB            | -5.096  | 0.00000 | 0.00032 |
| Enhancer of polycomb homolog 1 (Drosophila)                                                    | EPC1             | -2.627  | 0.04330 | 0.09004 |
| enolase 2 (gamma, neuronal)                                                                    | ENO2             | 1.592   | 0.00282 | 0.01559 |
| enoyl Coenzyme A hydratase 1, peroxisomal                                                      | ECH1             | -1.594  | 0.00269 | 0.01513 |
| enoyl Coenzyme A hydratase domain containing 3                                                 | ECHDC3           | -5.566  | 0.00323 | 0.01708 |
| ependymin related protein 1 (zebrafish)                                                        | EPDR1            | 1.582   | 0.00250 | 0.01447 |

|                                                                                                                                 |          |        |         |         |
|---------------------------------------------------------------------------------------------------------------------------------|----------|--------|---------|---------|
| EPH receptor A3                                                                                                                 | EPHA3    | 1.671  | 0.04120 | 0.08727 |
| EPH receptor A7                                                                                                                 | EPHA7    | -5.606 | 0.01860 | 0.05251 |
| EPH receptor B2                                                                                                                 | EPHB2    | 2.376  | 0.00002 | 0.00069 |
| ephrin-A4                                                                                                                       | EFNA4    | 1.571  | 0.00001 | 0.00041 |
| ephrin-A5                                                                                                                       | EFNA5    | 1.712  | 0.02970 | 0.07100 |
| ephrin-B2                                                                                                                       | EFNB2    | -6.601 | 0.00027 | 0.00356 |
| epidermal growth factor receptor (erythroblastic leukemia viral (v-erb-b) oncogene homolog, avian)                              | EGFR     | -2.686 | 0.00000 | 0.00010 |
| epidermal growth factor receptor pathway substrate 8                                                                            | EPS8     | -1.996 | 0.00000 | 0.00024 |
| epithelial membrane protein 3                                                                                                   | EMP3     | 2.625  | 0.00000 | 0.00029 |
| EPS8-like 2                                                                                                                     | EPS8L2   | 2.570  | 0.00001 | 0.00036 |
| ERBB receptor feedback inhibitor 1                                                                                              | ERRF1    | -4.905 | 0.00000 | 0.00002 |
| ERO1-like ( <i>S. cerevisiae</i> )                                                                                              | ERO1L    | 1.531  | 0.02240 | 0.05919 |
| ERO1-like beta ( <i>S. cerevisiae</i> )                                                                                         | ERO1LB   | -1.725 | 0.00041 | 0.00468 |
| erythrocyte membrane protein band 4.1 (elliptocytosis 1, RH-linked)                                                             | EPB41    | 1.623  | 0.00000 | 0.00018 |
| erythrocyte membrane protein band 4.1 like 4A                                                                                   | EPB41L4A | 3.012  | 0.00007 | 0.00156 |
| erythrocyte membrane protein band 4.1-like 3                                                                                    | EPB41L3  | 1.735  | 0.01210 | 0.03950 |
| ethanolamine kinase 1                                                                                                           | ETNK1    | -1.784 | 0.00195 | 0.01252 |
| ets variant 1                                                                                                                   | ETV1     | 1.681  | 0.00209 | 0.01304 |
| Ets2 repressor factor                                                                                                           | ERF      | 2.505  | 0.00010 | 0.00197 |
| eukaryotic elongation factor-2 kinase                                                                                           | EEF2K    | -1.512 | 0.01870 | 0.05269 |
| eukaryotic translation elongation factor 1 alpha 1                                                                              | EEF1A1   | -1.743 | 0.00086 | 0.00739 |
| eukaryotic translation elongation factor 1 beta 2                                                                               | EEF1B2   | -1.545 | 0.00007 | 0.00158 |
| eukaryotic translation initiation factor 1                                                                                      | EIF1     | -4.470 | 0.02300 | 0.06018 |
| eukaryotic translation initiation factor 1A domain containing                                                                   | EIF1AD   | -1.596 | 0.00163 | 0.01112 |
| eukaryotic translation initiation factor 1B                                                                                     | EIF1B    | -1.608 | 0.00900 | 0.03290 |
| eukaryotic translation initiation factor 2, subunit 1 alpha, 35kDa                                                              | EIF2S1   | -1.569 | 0.00022 | 0.00321 |
| eukaryotic translation initiation factor 2, subunit 3 gamma, 52kDa                                                              | EIF2S3   | -1.567 | 0.00404 | 0.01978 |
| eukaryotic translation initiation factor 2-alpha kinase 1                                                                       | EIF2AK1  | 1.561  | 0.00471 | 0.02186 |
| eukaryotic translation initiation factor 2C, 2                                                                                  | EIF2C2   | -1.829 | 0.00073 | 0.00670 |
| eukaryotic translation initiation factor 3, subunit B                                                                           | EIF3B    | -1.809 | 0.01100 | 0.03720 |
| Eukaryotic translation initiation factor 4A, isoform 1                                                                          | EIF4A1   | -3.699 | 0.02110 | 0.05698 |
| eukaryotic translation initiation factor 4B                                                                                     | EIF4B    | -1.755 | 0.00000 | 0.00022 |
| eukaryotic translation initiation factor 5B                                                                                     | EIF5B    | -1.546 | 0.01440 | 0.04432 |
| excision repair cross-complementing rodent repair deficiency, complementation group 1 (includes overlapping antisense sequence) | ERCC1    | 1.551  | 0.00406 | 0.01982 |
| exostoses (multiple) 1                                                                                                          | EXT1     | 1.739  | 0.01700 | 0.04945 |
| exportin 1 (CRM1 homolog, yeast)                                                                                                | XPO1     | 2.121  | 0.00127 | 0.00949 |
| extracellular matrix protein 1                                                                                                  | ECM1     | 3.148  | 0.00023 | 0.00328 |
| ezrin                                                                                                                           | EZR      | -2.411 | 0.00232 | 0.01383 |
| family with sequence similarity 100, member B                                                                                   | FAM100B  | -2.078 | 0.00122 | 0.00926 |
| family with sequence similarity 101, member B                                                                                   | FAM101B  | -1.923 | 0.00364 | 0.01852 |
| family with sequence similarity 102, member A                                                                                   | FAM102A  | 1.963  | 0.00000 | 0.00018 |
| family with sequence similarity 102, member B                                                                                   | FAM102B  | 2.299  | 0.00000 | 0.00002 |
| family with sequence similarity 108, member B1                                                                                  | FAM108B1 | -1.562 | 0.00037 | 0.00437 |
| family with sequence similarity 109, member B                                                                                   | FAM109B  | 1.622  | 0.00030 | 0.00383 |
| family with sequence similarity 110, member B                                                                                   | FAM110B  | 2.027  | 0.00179 | 0.01177 |
| family with sequence similarity 110, member C                                                                                   | FAM110C  | -3.893 | 0.01410 | 0.04372 |
| family with sequence similarity 114, member A1                                                                                  | FAM114A1 | 1.766  | 0.00001 | 0.00040 |
| family with sequence similarity 117, member A                                                                                   | FAM117A  | 1.531  | 0.01350 | 0.04247 |
| family with sequence similarity 118, member B                                                                                   | FAM118B  | 1.969  | 0.00003 | 0.00101 |
| family with sequence similarity 119, member B                                                                                   | FAM119B  | 2.408  | 0.00023 | 0.00326 |



|                                                                                                          |                      |         |         |         |
|----------------------------------------------------------------------------------------------------------|----------------------|---------|---------|---------|
| Family with sequence similarity 124A                                                                     | FAM124A              | 1.833   | 0.00005 | 0.00132 |
| family with sequence similarity 13, member C                                                             | FAM13C               | 1.959   | 0.00206 | 0.01294 |
| family with sequence similarity 131, member A                                                            | FAM131A              | -1.658  | 0.00000 | 0.00020 |
| family with sequence similarity 133, member A                                                            | FAM133A              | 3.820   | 0.00031 | 0.00389 |
| family with sequence similarity 133, member B                                                            | FAM133B              | -1.557  | 0.00003 | 0.00101 |
| family with sequence similarity 149, member A                                                            | FAM149A              | 1.878   | 0.03520 | 0.07911 |
| family with sequence similarity 150, member B                                                            | FAM150B              | -2.483  | 0.00202 | 0.01279 |
| family with sequence similarity 167, member A                                                            | FAM167A              | 3.453   | 0.00017 | 0.00274 |
| family with sequence similarity 171, member A1                                                           | FAM171A1             | 1.880   | 0.00002 | 0.00065 |
| family with sequence similarity 171, member B                                                            | FAM171B              | 1.556   | 0.01630 | 0.04803 |
| family with sequence similarity 174, member B                                                            | FAM174B              | 1.686   | 0.00192 | 0.01240 |
| family with sequence similarity 178, member A                                                            | FAM178A              | 1.535   | 0.00069 | 0.00648 |
| family with sequence similarity 181, member B                                                            | FAM181B              | 2.218   | 0.00656 | 0.02694 |
| family with sequence similarity 189, member A2                                                           | FAM189A2             | 1.868   | 0.00061 | 0.00603 |
| family with sequence similarity 19 (chemokine (C-C motif)-like), member A5                               | FAM19A5              | -4.035  | 0.02320 | 0.06052 |
| family with sequence similarity 20, member C                                                             | FAM20C               | 1.587   | 0.00056 | 0.00573 |
| family with sequence similarity 3, member B                                                              | FAM3B                | 2.793   | 0.00001 | 0.00035 |
| family with sequence similarity 43, member B                                                             | FAM43B               | 3.933   | 0.00000 | 0.00012 |
| family with sequence similarity 45, member A /// family with sequence similarity 45, member A pseudogene | FAM45A ///<br>FAM45B | 1.668   | 0.00597 | 0.02537 |
| family with sequence similarity 46, member C                                                             | FAM46C               | 1.952   | 0.00002 | 0.00067 |
| family with sequence similarity 5, member C                                                              | FAM5C                | 4.383   | 0.00259 | 0.01478 |
| family with sequence similarity 57, member A                                                             | FAM57A               | 2.581   | 0.00003 | 0.00094 |
| family with sequence similarity 65, member B                                                             | FAM65B               | -4.238  | 0.01010 | 0.03532 |
| Family with sequence similarity 7, member A3                                                             | FAM7A3               | 1.666   | 0.03410 | 0.07762 |
| family with sequence similarity 70, member A                                                             | FAM70A               | -3.376  | 0.01230 | 0.03990 |
| family with sequence similarity 83, member D                                                             | FAM83D               | -23.930 | 0.02450 | 0.06273 |
| family with sequence similarity 84, member B                                                             | FAM84B               | 1.543   | 0.04570 | 0.09307 |
| Family with sequence similarity 98, member A                                                             | FAM98A               | 1.727   | 0.02260 | 0.05950 |
| Fanconi anemia, complementation group F                                                                  | FANCF                | 2.092   | 0.00000 | 0.00024 |
| Far upstream element (FUSE) binding protein 1                                                            | FUBP1                | 1.534   | 0.00430 | 0.02058 |
| Fas (TNF receptor superfamily, member 6)                                                                 | FAS                  | 1.553   | 0.04430 | 0.09121 |
| fasciculation and elongation protein zeta 1 (zygin I)                                                    | FEZ1                 | 1.615   | 0.00001 | 0.00044 |
| fascin homolog 1, actin-bundling protein (Strongylocentrotus purpuratus)                                 | FSCN1                | 3.228   | 0.00000 | 0.00003 |
| FAT tumor suppressor homolog 1 (Drosophila)                                                              | FAT1                 | 1.892   | 0.00012 | 0.00226 |
| FAT tumor suppressor homolog 3 (Drosophila)                                                              | FAT3                 | -41.853 | 0.01180 | 0.03884 |
| FAT tumor suppressor homolog 4 (Drosophila)                                                              | FAT4                 | 1.788   | 0.00006 | 0.00148 |
| fatty acid binding protein 5 (psoriasis-associated)                                                      | FABP5                | 2.740   | 0.00330 | 0.01731 |
| Fatty acyl CoA reductase 2                                                                               | FAR2                 | -1.517  | 0.04580 | 0.09320 |
| FBJ murine osteosarcoma viral oncogene homolog                                                           | FOS                  | -10.786 | 0.00002 | 0.00066 |
| FBJ murine osteosarcoma viral oncogene homolog B                                                         | FOSB                 | -60.030 | 0.00105 | 0.00840 |
| F-box and leucine-rich repeat protein 14                                                                 | FBXL14               | 1.607   | 0.00089 | 0.00762 |
| F-box and leucine-rich repeat protein 16                                                                 | FBXL16               | 3.785   | 0.02210 | 0.05872 |
| F-box and leucine-rich repeat protein 22                                                                 | FBXL22               | -8.710  | 0.04990 | 0.09837 |
| F-box and WD repeat domain containing 2                                                                  | FBXW2                | 1.516   | 0.00115 | 0.00894 |
| F-box protein 2                                                                                          | FBXO2                | 2.163   | 0.00172 | 0.01151 |
| F-box protein 30                                                                                         | FBXO30               | -1.737  | 0.00019 | 0.00290 |
| F-box protein 32                                                                                         | FBXO32               | -7.178  | 0.00802 | 0.03055 |
| F-box protein 42                                                                                         | FBXO42               | -1.916  | 0.01260 | 0.04051 |
| Fc fragment of IgG binding protein                                                                       | FCGBP                | 10.323  | 0.02700 | 0.06680 |
| Fc fragment of IgG, high affinity Ia, receptor (CD64) /// Fc fragment of                                 | FCGR1A ///           | 3.110   | 0.01710 | 0.04964 |

|                                                                                                          |                     |         |         |         |
|----------------------------------------------------------------------------------------------------------|---------------------|---------|---------|---------|
| IgG, high affinity I <sub>c</sub> , receptor (CD64)                                                      | FCGR1C              |         |         |         |
| fem-1 homolog b (C. elegans)                                                                             | FEM1B               | -1.699  | 0.00882 | 0.03253 |
| fem-1 homolog c (C. elegans)                                                                             | FEM1C               | -2.193  | 0.00021 | 0.00307 |
| FERM domain containing 4B                                                                                | FRMD4B              | 2.755   | 0.00003 | 0.00099 |
| FERM domain containing 5                                                                                 | FRMD5               | 4.951   | 0.00023 | 0.00323 |
| FERM, RhoGEF (ARHGEF) and pleckstrin domain protein 1 (chondrocyte-derived)                              | FARP1               | 1.529   | 0.00498 | 0.02264 |
| fermitin family homolog 1 (Drosophila)                                                                   | FERMT1              | 3.110   | 0.00002 | 0.00076 |
| fermitin family homolog 2 (Drosophila)                                                                   | FERMT2              | -1.612  | 0.00003 | 0.00090 |
| ferredoxin 1                                                                                             | FDX1                | -1.598  | 0.04180 | 0.08811 |
| ferredoxin reductase                                                                                     | FDXR                | 2.055   | 0.00000 | 0.00008 |
| FGFR1 oncogene partner 2                                                                                 | FGFR1OP2            | -1.563  | 0.00118 | 0.00907 |
| fibrillin 1                                                                                              | FBN1                | 2.049   | 0.00204 | 0.01287 |
| fibrinogen-like 2                                                                                        | FGL2                | 1.795   | 0.00460 | 0.02152 |
| fibroblast activation protein, alpha                                                                     | FAP                 | 3.726   | 0.00025 | 0.00338 |
| fibroblast growth factor 14                                                                              | FGF14               | 3.967   | 0.00000 | 0.00021 |
| fibroblast growth factor 18                                                                              | FGF18               | 1.649   | 0.00095 | 0.00792 |
| fibroblast growth factor 2 (basic)                                                                       | FGF2                | 1.876   | 0.00002 | 0.00073 |
| fibroblast growth factor 9 (glia-activating factor)                                                      | FGF9                | 9.607   | 0.00018 | 0.00285 |
| fibroblast growth factor binding protein 3                                                               | FGFBP3              | 2.642   | 0.00000 | 0.00010 |
| fibroblast growth factor receptor 2                                                                      | FGFR2               | 1.633   | 0.02690 | 0.06663 |
| fibronectin 1                                                                                            | FN1                 | 4.749   | 0.00043 | 0.00478 |
| Fibronectin leucine rich transmembrane protein 2                                                         | FLRT2               | 2.625   | 0.01170 | 0.03865 |
| fibronectin type III and SPRY domain containing 1-like                                                   | FSD1L               | 1.519   | 0.00733 | 0.02889 |
| fibronectin type III domain containing 1                                                                 | FNDC1               | 2.611   | 0.00063 | 0.00614 |
| fibronectin type III domain containing 7                                                                 | FNDC7               | 1.560   | 0.00449 | 0.02114 |
| fibulin 2                                                                                                | FBLN2               | 2.136   | 0.00039 | 0.00454 |
| fidgetin-like 1                                                                                          | FIGNL1              | 1.669   | 0.00382 | 0.01912 |
| filamin B, beta                                                                                          | FLNB                | -2.010  | 0.00070 | 0.00651 |
| filamin binding LIM protein 1                                                                            | FBLIM1              | -8.721  | 0.00052 | 0.00548 |
| FK506 binding protein 10, 65 kDa                                                                         | FKBP10              | 1.573   | 0.00876 | 0.03237 |
| FK506 binding protein 11, 19 kDa                                                                         | FKBP11              | 1.612   | 0.00530 | 0.02350 |
| FK506 binding protein 14, 22 kDa                                                                         | FKBP14              | 3.004   | 0.00084 | 0.00731 |
| FK506 binding protein 1B, 12.6 kDa                                                                       | FKBP1B              | 1.967   | 0.00033 | 0.00409 |
| FK506 binding protein 4, 59kDa                                                                           | FKBP4               | -1.566  | 0.00989 | 0.03483 |
| FK506 binding protein 5                                                                                  | FKBP5               | -13.777 | 0.00013 | 0.00229 |
| FLJ41603 protein                                                                                         | FLJ41603            | 2.215   | 0.00006 | 0.00145 |
| fms-related tyrosine kinase 1 (vascular endothelial growth factor/vascular permeability factor receptor) | FLT1                | -5.870  | 0.02700 | 0.06680 |
| folliculin                                                                                               | FLCN                | 1.595   | 0.02470 | 0.06310 |
| forkhead box D1                                                                                          | FOXD1               | 2.369   | 0.01650 | 0.04846 |
| forkhead box F2                                                                                          | FOXF2               | 1.872   | 0.00125 | 0.00941 |
| forkhead box G1                                                                                          | FOXG1               | -17.482 | 0.01530 | 0.04618 |
| forkhead box N2                                                                                          | FOXN2               | -1.870  | 0.00000 | 0.00016 |
| forkhead box N3                                                                                          | FOXN3               | -1.625  | 0.00058 | 0.00585 |
| forkhead box O1                                                                                          | FOXO1               | -2.362  | 0.00399 | 0.01960 |
| forkhead box O3                                                                                          | FOXO3               | -2.443  | 0.00085 | 0.00736 |
| forkhead box O3 /// forkhead box O3B pseudogene                                                          | FOXO3 ///<br>FOXO3B | -3.272  | 0.00001 | 0.00055 |
| forkhead box O6                                                                                          | FOXO6               | 1.517   | 0.00048 | 0.00522 |
| formin-like 2                                                                                            | FMNL2               | -3.277  | 0.04210 | 0.08854 |
| FOS-like antigen 2                                                                                       | FOSL2               | -3.065  | 0.00000 | 0.00005 |
| four and a half LIM domains 5                                                                            | FHL5                | -99.781 | 0.01270 | 0.04072 |

|                                                                                                                                                                                                |                                                   |         |         |         |
|------------------------------------------------------------------------------------------------------------------------------------------------------------------------------------------------|---------------------------------------------------|---------|---------|---------|
| four jointed box 1 (Drosophila)                                                                                                                                                                | FJX1                                              | 3.676   | 0.00017 | 0.00270 |
| fragile X mental retardation, autosomal homolog 1                                                                                                                                              | FXR1                                              | -1.520  | 0.01740 | 0.05024 |
| FRAS1 related extracellular matrix 1                                                                                                                                                           | FREM1                                             | 2.034   | 0.00982 | 0.03466 |
| Fraser syndrome 1                                                                                                                                                                              | FRAS1                                             | 2.322   | 0.02090 | 0.05673 |
| frizzled homolog 10 (Drosophila)                                                                                                                                                               | FZD10                                             | 2.767   | 0.00149 | 0.01052 |
| frizzled homolog 2 (Drosophila)                                                                                                                                                                | FZD2                                              | 2.916   | 0.00087 | 0.00744 |
| frizzled homolog 5 (Drosophila)                                                                                                                                                                | FZD5                                              | -2.009  | 0.00023 | 0.00328 |
| frizzled homolog 7 (Drosophila)                                                                                                                                                                | FZD7                                              | 1.582   | 0.01500 | 0.04561 |
| frizzled homolog 8 (Drosophila)                                                                                                                                                                | FZD8                                              | 2.257   | 0.00061 | 0.00604 |
| Frizzled-related protein                                                                                                                                                                       | FRZB                                              | 1.719   | 0.01270 | 0.04072 |
| FRY-like                                                                                                                                                                                       | FRYL                                              | -3.652  | 0.01780 | 0.05103 |
| fucosidase, alpha-L- 2, plasma                                                                                                                                                                 | FUCA2                                             | 1.668   | 0.00005 | 0.00120 |
| fucosyltransferase 11 (alpha (1,3) fucosyltransferase)                                                                                                                                         | FUT11                                             | 2.060   | 0.00004 | 0.00117 |
| fucosyltransferase 8 (alpha (1,6) fucosyltransferase)                                                                                                                                          | FUT8                                              | 1.921   | 0.00033 | 0.00408 |
| fukutin related protein                                                                                                                                                                        | FKRP                                              | -2.077  | 0.00058 | 0.00583 |
| FXYD domain containing ion transport regulator 5                                                                                                                                               | FXYD5                                             | 2.278   | 0.00102 | 0.00824 |
| FYVE, RhoGEF and PH domain containing 2                                                                                                                                                        | FGD2                                              | -2.045  | 0.03540 | 0.07942 |
| FYVE, RhoGEF and PH domain containing 4                                                                                                                                                        | FGD4                                              | -2.129  | 0.00000 | 0.00009 |
| G protein-coupled estrogen receptor 1                                                                                                                                                          | GPER                                              | 2.011   | 0.00003 | 0.00095 |
| G protein-coupled receptor 116                                                                                                                                                                 | GPR116                                            | -3.728  | 0.00638 | 0.02643 |
| G protein-coupled receptor 125                                                                                                                                                                 | GPR125                                            | 1.590   | 0.00036 | 0.00433 |
| G protein-coupled receptor 126                                                                                                                                                                 | GPR126                                            | -2.815  | 0.00583 | 0.02502 |
| G protein-coupled receptor 137C                                                                                                                                                                | GPR137C                                           | 1.579   | 0.00898 | 0.03285 |
| G protein-coupled receptor 153                                                                                                                                                                 | GPR153                                            | 1.712   | 0.02660 | 0.06620 |
| G protein-coupled receptor 157                                                                                                                                                                 | GPR157                                            | 2.078   | 0.00000 | 0.00004 |
| G protein-coupled receptor 158                                                                                                                                                                 | GPR158                                            | 2.783   | 0.00835 | 0.03134 |
| G protein-coupled receptor 162 /// leprecan-like 2                                                                                                                                             | GPR162 ///<br>LEPREL2                             | 2.305   | 0.00000 | 0.00010 |
| G protein-coupled receptor 183                                                                                                                                                                 | GPR183                                            | -14.955 | 0.00000 | 0.00025 |
| G protein-coupled receptor 68                                                                                                                                                                  | GPR68                                             | 1.535   | 0.02830 | 0.06878 |
| G protein-coupled receptor 83                                                                                                                                                                  | GPR83                                             | 3.422   | 0.00473 | 0.02192 |
| G protein-coupled receptor 88                                                                                                                                                                  | GPR88                                             | -3.381  | 0.00415 | 0.02011 |
| G protein-coupled receptor, family C, group 5, member A                                                                                                                                        | GPRC5A                                            | 1.505   | 0.01280 | 0.04091 |
| G protein-coupled receptor, family C, group 5, member C                                                                                                                                        | GPRC5C                                            | -2.097  | 0.01240 | 0.04009 |
| G0/G1switch 2                                                                                                                                                                                  | G0S2                                              | 3.583   | 0.00044 | 0.00488 |
| G1 to S phase transition 1                                                                                                                                                                     | GSPT1                                             | -2.080  | 0.03610 | 0.08054 |
| GABA(A) receptor-associated protein like 1                                                                                                                                                     | GABARAPL1                                         | -2.185  | 0.00071 | 0.00658 |
| GABA(A) receptor-associated protein like 1 /// GABA(A) receptors associated protein like 3 (pseudogene)                                                                                        | GABARAPL1 ///<br>GABARAPL3                        | -1.894  | 0.00405 | 0.01981 |
| galactose mutarotase (aldose 1-epimerase)                                                                                                                                                      | GALM                                              | 2.977   | 0.00001 | 0.00046 |
| galactose-3-O-sulfotransferase 4                                                                                                                                                               | GAL3ST4                                           | 2.036   | 0.00000 | 0.00009 |
| gamma-aminobutyric acid (GABA) A receptor, epsilon                                                                                                                                             | GABRE                                             | -1.911  | 0.00893 | 0.03275 |
| gamma-glutamyl carboxylase                                                                                                                                                                     | GGCX                                              | 1.775   | 0.00095 | 0.00791 |
| gamma-glutamyl hydrolase (conjugase, folypolyglammaglutamyl hydrolase)                                                                                                                         | GGH                                               | 1.628   | 0.04240 | 0.08892 |
| gamma-glutamyltransferase 1                                                                                                                                                                    | GGT1                                              | 2.277   | 0.00010 | 0.00193 |
| gamma-glutamyltransferase 1 /// gamma-glutamyltransferase 2 /// gamma-glutamyltransferase 3 pseudogene /// gamma-glutamyltransferase light chain 2 /// gamma-glutamyltransferase light chain 3 | GGT1 /// GGT2 ///<br>GGT3P /// GGTL2<br>/// GGTL3 | 1.786   | 0.00007 | 0.00156 |
| gamma-glutamyltransferase 5                                                                                                                                                                    | GGT5                                              | -3.211  | 0.00000 | 0.00018 |
| gap junction protein, alpha 4, 37kDa                                                                                                                                                           | GJA4                                              | -2.689  | 0.00069 | 0.00648 |
| gap junction protein, alpha 5, 40kDa                                                                                                                                                           | GJA5                                              | -1.680  | 0.04510 | 0.09228 |
| gap junction protein, gamma 1, 45kDa                                                                                                                                                           | GJC1                                              | -2.418  | 0.01160 | 0.03843 |

|                                                                                                   |                                            |         |         |         |
|---------------------------------------------------------------------------------------------------|--------------------------------------------|---------|---------|---------|
| Gardner-Rasheed feline sarcoma viral (v-fgr) oncogene homolog                                     | FGR                                        | -2.285  | 0.00747 | 0.02923 |
| GATA binding protein 3                                                                            | GATA3                                      | 2.043   | 0.02110 | 0.05698 |
| GATA binding protein 5                                                                            | GATA5                                      | 2.233   | 0.00032 | 0.00403 |
| GATS protein-like 3 /// TBC1 domain family, member 10A                                            | GATSL3 ///<br>TBC1D10A                     | -1.717  | 0.03650 | 0.08111 |
| general transcription factor IIA, 1-like /// stonin 1 /// STON1-GTF2A1L<br>readthrough transcript | GTF2A1L ///<br>STON1 /// STON1-<br>GTF2A1L | -2.254  | 0.01520 | 0.04600 |
| general transcription factor IIIA                                                                 | GTF3A                                      | 2.891   | 0.00001 | 0.00058 |
| GLI family zinc finger 2                                                                          | GLI2                                       | 3.301   | 0.00000 | 0.00002 |
| GLI family zinc finger 3                                                                          | GLI3                                       | 1.777   | 0.00375 | 0.01887 |
| GLI pathogenesis-related 2                                                                        | GLIPR2                                     | 1.758   | 0.00034 | 0.00413 |
| glia maturation factor, beta                                                                      | GMFB                                       | -1.840  | 0.01200 | 0.03929 |
| glioblastoma amplified sequence                                                                   | GBAS                                       | -2.167  | 0.04560 | 0.09293 |
| GLIS family zinc finger 2                                                                         | GLIS2                                      | 2.594   | 0.00001 | 0.00047 |
| GLIS family zinc finger 3                                                                         | GLIS3                                      | 1.745   | 0.01140 | 0.03802 |
| glucocorticoid modulatory element binding protein 1                                               | GMEB1                                      | 1.578   | 0.00377 | 0.01894 |
| glucosaminyl (N-acetyl) transferase 1, core 2 (beta-1,6-N-<br>acetylglucosaminyltransferase)      | GCNT1                                      | 1.736   | 0.00500 | 0.02269 |
| glucose-fructose oxidoreductase domain containing 1                                               | GFOD1                                      | -6.230  | 0.00000 | 0.00006 |
| glucosidase, alpha; acid                                                                          | GAA                                        | 1.521   | 0.00907 | 0.03304 |
| glucosidase, beta; acid (includes glucosylceramidase) /// glucosidase,<br>beta; acid, pseudogene  | GBA /// GBAP                               | 2.040   | 0.00027 | 0.00358 |
| glucosidase, beta; acid, pseudogene                                                               | GBAP                                       | 1.501   | 0.00018 | 0.00285 |
| glucuronic acid epimerase                                                                         | GLCE                                       | 2.088   | 0.00017 | 0.00273 |
| glucuronidase, beta pseudogene                                                                    | LOC653188                                  | 1.955   | 0.00464 | 0.02164 |
| glucuronidase, beta pseudogene /// glucuronidase, beta pseudogene                                 | SMA4 /// SMA5                              | 1.691   | 0.03810 | 0.08337 |
| glutamate dehydrogenase 1                                                                         | GLUD1                                      | 2.339   | 0.00050 | 0.00532 |
| glutamate receptor, ionotropic, AMPA 3                                                            | GRIA3                                      | 1.912   | 0.00758 | 0.02948 |
| glutamate-ammonia ligase (glutamine synthetase)                                                   | GLUL                                       | -6.102  | 0.00066 | 0.00629 |
| glutamate-rich 1                                                                                  | ERICH1                                     | -1.607  | 0.00053 | 0.00553 |
| glutamine-fructose-6-phosphate transaminase 2                                                     | GFPT2                                      | 2.017   | 0.02270 | 0.05971 |
| glutamyl aminopeptidase (aminopeptidase A)                                                        | ENPEP                                      | -22.483 | 0.03820 | 0.08346 |
| glutaredoxin (thioltransferase)                                                                   | GLRX                                       | -2.397  | 0.00489 | 0.02244 |
| glutaryl-Coenzyme A dehydrogenase                                                                 | GCDH                                       | -2.152  | 0.00025 | 0.00339 |
| glutathione peroxidase 3 (plasma)                                                                 | GPX3                                       | -3.234  | 0.00005 | 0.00132 |
| glutathione peroxidase 8 (putative)                                                               | GPX8                                       | 2.279   | 0.00001 | 0.00033 |
| glutathione S-transferase mu 3 (brain)                                                            | GSTM3                                      | -2.383  | 0.00112 | 0.00881 |
| glycerol-3-phosphate acyltransferase 2, mitochondrial                                             | GPAT2                                      | 1.910   | 0.01840 | 0.05217 |
| glycerol-3-phosphate acyltransferase, mitochondrial                                               | GPAM                                       | 2.405   | 0.01250 | 0.04030 |
| glycerophosphodiester phosphodiesterase domain containing 1                                       | GDPD1                                      | 2.041   | 0.00000 | 0.00018 |
| glycerophosphodiester phosphodiesterase domain containing 5                                       | GDPD5                                      | 1.942   | 0.00807 | 0.03068 |
| glycine C-acetyltransferase (2-amino-3-ketobutyrate coenzyme A<br>ligase)                         | GCAT                                       | -2.366  | 0.00955 | 0.03406 |
| glycine-N-acyltransferase-like 2                                                                  | GLYATL2                                    | 1.696   | 0.03040 | 0.07216 |
| glycogen synthase 1 (muscle)                                                                      | GYS1                                       | -2.919  | 0.00681 | 0.02756 |
| glycoprotein M6A                                                                                  | GPM6A                                      | 1.752   | 0.02640 | 0.06588 |
| glycoprotein, alpha-galactosyltransferase 1                                                       | GGTA1                                      | -1.740  | 0.00165 | 0.01120 |
| glycosyltransferase 25 domain containing 2                                                        | GLT25D2                                    | 3.213   | 0.00018 | 0.00282 |
| glyoxylate reductase 1 homolog (Arabidopsis) /// septin 6                                         | GLYR1 /// SEPT6                            | 1.975   | 0.00003 | 0.00097 |
| golgi associated, gamma adaptin ear containing, ARF binding protein<br>2                          | GGA2                                       | 1.580   | 0.00044 | 0.00491 |
| golgi autoantigen, golgin subfamily a, 1                                                          | GOLGA1                                     | 1.599   | 0.00004 | 0.00109 |
| golgi autoantigen, golgin subfamily a, 8A                                                         | GOLGA8A                                    | -2.883  | 0.03680 | 0.08151 |

|                                                                                                       |                        |         |         |         |
|-------------------------------------------------------------------------------------------------------|------------------------|---------|---------|---------|
| golgi autoantigen, golgin subfamily a, 8B                                                             | GOLGA8B                | -1.835  | 0.01120 | 0.03762 |
| golgi membrane protein 1                                                                              | GOLM1                  | 1.655   | 0.00948 | 0.03394 |
| Golgi-localized protein                                                                               | GOLSYN                 | -2.117  | 0.01470 | 0.04495 |
| golgin, RAB6-interacting                                                                              | GORAB                  | 1.738   | 0.00000 | 0.00013 |
| GPN-loop GTPase 3                                                                                     | GPN3                   | -1.665  | 0.00031 | 0.00394 |
| GRAM domain containing 2                                                                              | GRAMD2                 | 2.510   | 0.00013 | 0.00232 |
| GRAM domain containing 3                                                                              | GRAMD3                 | -2.444  | 0.01570 | 0.04695 |
| GRAM domain containing 4                                                                              | GRAMD4                 | 1.827   | 0.00003 | 0.00089 |
| granzyme A (granzyme 1, cytotoxic T-lymphocyte-associated serine esterase 3)                          | GZMA                   | -1.722  | 0.04080 | 0.08683 |
| granzyme K (granzyme 3; tryptase II)                                                                  | GZMK                   | -2.822  | 0.01370 | 0.04289 |
| GREB1 protein                                                                                         | GREB1                  | 3.253   | 0.00000 | 0.00002 |
| growth arrest and DNA-damage-inducible, alpha                                                         | GADD45A                | -2.679  | 0.00000 | 0.00012 |
| growth arrest and DNA-damage-inducible, beta                                                          | GADD45B                | -6.548  | 0.00000 | 0.00003 |
| growth arrest and DNA-damage-inducible, gamma                                                         | GADD45G                | -5.552  | 0.00200 | 0.01271 |
| Growth arrest-specific 2 like 3                                                                       | GAS2L3                 | 1.593   | 0.03640 | 0.08095 |
| growth arrest-specific 5 (non-protein coding)                                                         | GAS5                   | -2.018  | 0.00014 | 0.00242 |
| growth arrest-specific 7                                                                              | GAS7                   | 1.860   | 0.00250 | 0.01447 |
| growth associated protein 43                                                                          | GAP43                  | 6.782   | 0.00006 | 0.00145 |
| growth differentiation factor 1 /// LAG1 homolog, ceramide synthase 1                                 | GDF1 /// LASS1         | 4.458   | 0.00000 | 0.00016 |
| growth differentiation factor 15 /// similar to growth differentiation factor 15                      | GDF15 /// LOC100292463 | 1.627   | 0.00277 | 0.01539 |
| growth hormone regulated TBC protein 1                                                                | GRTP1                  | 1.707   | 0.00803 | 0.03057 |
| GRP1 (general receptor for phosphoinositides 1)-associated scaffold protein                           | GRASP                  | -1.727  | 0.00118 | 0.00907 |
| GrpE-like 1, mitochondrial (E. coli)                                                                  | GRPEL1                 | -1.709  | 0.01120 | 0.03762 |
| GTF2I repeat domain containing 2                                                                      | GTF2IRD2               | -1.801  | 0.00126 | 0.00945 |
| GTP cyclohydrolase 1                                                                                  | GCH1                   | -5.575  | 0.00202 | 0.01279 |
| GTPase, IMAP family member 2                                                                          | GIMAP2                 | 1.540   | 0.02970 | 0.07100 |
| guanine nucleotide binding protein (G protein), alpha 14                                              | GNA14                  | 4.310   | 0.00000 | 0.00008 |
| guanine nucleotide binding protein (G protein), alpha activating activity polypeptide O               | GNAO1                  | 1.599   | 0.00902 | 0.03294 |
| guanine nucleotide binding protein (G protein), alpha activating activity polypeptide, olfactory type | GNAL                   | 1.744   | 0.00530 | 0.02350 |
| guanine nucleotide binding protein (G protein), alpha inhibiting activity polypeptide 1               | GNAI1                  | -2.642  | 0.00530 | 0.02350 |
| guanine nucleotide binding protein (G protein), alpha z polypeptide                                   | GNAZ                   | 3.244   | 0.00001 | 0.00051 |
| guanine nucleotide binding protein (G protein), gamma 2                                               | GNG2                   | 2.840   | 0.00065 | 0.00626 |
| guanylate binding protein 4                                                                           | GBP4                   | 2.063   | 0.00082 | 0.00720 |
| hairless homolog (mouse)                                                                              | HR                     | 1.571   | 0.00207 | 0.01298 |
| hairy/enhancer-of-split related with YRPW motif 1                                                     | HEY1                   | -7.807  | 0.02960 | 0.07084 |
| hairy/enhancer-of-split related with YRPW motif-like                                                  | HEYL                   | -1.972  | 0.00106 | 0.00846 |
| haptoglobin                                                                                           | HP                     | -2.209  | 0.00854 | 0.03178 |
| haptoglobin /// haptoglobin-related protein                                                           | HP /// HPR             | -4.674  | 0.00012 | 0.00218 |
| haptoglobin-related protein                                                                           | HPR                    | -5.107  | 0.00106 | 0.00846 |
| HAUS augmin-like complex, subunit 5                                                                   | HAUS5                  | 1.592   | 0.00042 | 0.00475 |
| HCCA2 protein                                                                                         | HCCA2                  | -1.919  | 0.02580 | 0.06489 |
| hCG1645220                                                                                            | hCG_1645220            | 2.083   | 0.00304 | 0.01640 |
| heat shock 105kDa/110kDa protein 1                                                                    | HSPH1                  | -2.348  | 0.03900 | 0.08452 |
| heat shock 22kDa protein 8                                                                            | HSPB8                  | -6.049  | 0.00491 | 0.02249 |
| heat shock 27kDa protein 1                                                                            | HSPB1                  | -2.345  | 0.01830 | 0.05201 |
| heat shock 27kDa protein 3                                                                            | HSPB3                  | -69.738 | 0.03420 | 0.07775 |
| heat shock 27kDa protein family, member 7 (cardiovascular)                                            | HSPB7                  | -20.833 | 0.01350 | 0.04247 |
| heat shock 60kDa protein 1 (chaperonin)                                                               | HSPD1                  | -1.794  | 0.00374 | 0.01883 |

|                                                                   |                              |         |         |         |
|-------------------------------------------------------------------|------------------------------|---------|---------|---------|
| heat shock 70kDa protein 12A                                      | HSPA12A                      | 3.494   | 0.00000 | 0.00014 |
| heat shock 70kDa protein 1A                                       | HSPA1A                       | -1.626  | 0.01690 | 0.04924 |
| heat shock 70kDa protein 1A /// heat shock 70kDa protein 1B       | HSPA1A ///<br>HSPA1B         | -1.688  | 0.02930 | 0.07040 |
| heat shock 70kDa protein 4-like                                   | HSPA4L                       | 2.112   | 0.00074 | 0.00671 |
| heat shock 70kDa protein 9 (mortalin)                             | HSPA9                        | -1.579  | 0.00607 | 0.02567 |
| heat shock protein, alpha-crystallin-related, B6                  | HSPB6                        | -3.431  | 0.03300 | 0.07609 |
| heat-responsive protein 12                                        | HRSP12                       | -1.717  | 0.02290 | 0.06004 |
| hect domain and RLD 6                                             | HERC6                        | 1.521   | 0.02970 | 0.07100 |
| HECT domain containing 2                                          | HECTD2                       | 1.505   | 0.01300 | 0.04135 |
| HEG homolog 1 (zebrafish)                                         | HEG1                         | 1.574   | 0.03760 | 0.08263 |
| helicase, lymphoid-specific                                       | HELLS                        | 1.541   | 0.00426 | 0.02045 |
| hematopoietic cell-specific Lyn substrate 1                       | HCLS1                        | -3.155  | 0.00057 | 0.00574 |
| hematopoietic prostaglandin D synthase                            | HPGDS                        | 4.839   | 0.00018 | 0.00285 |
| hematopoietically expressed homeobox                              | HHEX                         | 2.132   | 0.02750 | 0.06753 |
| heme binding protein 2                                            | HEBP2                        | -1.673  | 0.00051 | 0.00538 |
| heme oxygenase (decycling) 2                                      | HMOX2                        | -1.511  | 0.03830 | 0.08355 |
| hemochromatosis                                                   | HFE                          | 1.885   | 0.00301 | 0.01629 |
| heparan sulfate 2-O-sulfotransferase 1                            | HS2ST1                       | 2.439   | 0.00126 | 0.00945 |
| heparan sulfate 2-O-sulfotransferase 1 /// hypothetical LOC339524 | HS2ST1 ///<br>LOC339524      | 2.220   | 0.02250 | 0.05936 |
| heparan-alpha-glucosaminide N-acetyltransferase                   | HGSNAT                       | 1.797   | 0.00010 | 0.00193 |
| heparin-binding EGF-like growth factor                            | HBEGF                        | -2.314  | 0.04140 | 0.08751 |
| hepatic leukemia factor                                           | HLF                          | 2.339   | 0.00523 | 0.02333 |
| hepatocellular carcinoma-related HCRP1                            | HCRP1                        | 1.604   | 0.00194 | 0.01249 |
| hepatocyte growth factor (hepapoietin A; scatter factor)          | HGF                          | 2.119   | 0.00134 | 0.00981 |
| heterochromatin protein 1, binding protein 3                      | HP1BP3                       | -1.534  | 0.01020 | 0.03553 |
| heterogeneous nuclear ribonucleoprotein D-like                    | HNRPD                        | -1.612  | 0.00082 | 0.00720 |
| heterogeneous nuclear ribonucleoprotein H1 (H)                    | HNRNPH1                      | -1.695  | 0.04130 | 0.08737 |
| HHIP-like 2                                                       | HHIPL2                       | 1.615   | 0.00090 | 0.00762 |
| HIG1 hypoxia inducible domain family, member 1A                   | HIGD1A                       | -1.677  | 0.00453 | 0.02128 |
| high-mobility group box 2                                         | HMGB2                        | -1.682  | 0.00090 | 0.00766 |
| hippocalcin like 4                                                | HPCAL4                       | -1.782  | 0.00503 | 0.02278 |
| histamine receptor H1                                             | HRH1                         | 5.081   | 0.00002 | 0.00079 |
| histone cluster 1, H1c                                            | HIST1H1C                     | -1.884  | 0.03560 | 0.07979 |
| histone cluster 1, H2bc                                           | HIST1H2BC                    | 1.543   | 0.00738 | 0.02900 |
| histone cluster 1, H2bh                                           | HIST1H2BH                    | 1.538   | 0.00198 | 0.01262 |
| histone cluster 2, H2aa3 /// histone cluster 2, H2aa4             | HIST2H2AA3 ///<br>HIST2H2AA4 | -2.223  | 0.00096 | 0.00793 |
| histone cluster 2, H2be                                           | HIST2H2BE                    | -9.464  | 0.00220 | 0.01343 |
| histone deacetylase 4                                             | HDAC4                        | 1.571   | 0.00003 | 0.00100 |
| histone deacetylase 8                                             | HDAC8                        | -1.762  | 0.00145 | 0.01036 |
| histone deacetylase 9                                             | HDAC9                        | -9.433  | 0.00832 | 0.03129 |
| HLA complex group 27                                              | HCG27                        | 1.619   | 0.00058 | 0.00582 |
| HMG-box transcription factor 1                                    | HBP1                         | -3.878  | 0.00587 | 0.02512 |
| homeodomain interacting protein kinase 2                          | HIPK2                        | -3.512  | 0.00000 | 0.00006 |
| homer homolog 1 (Drosophila)                                      | HOMER1                       | -6.965  | 0.01950 | 0.05408 |
| homer homolog 3 (Drosophila)                                      | HOMER3                       | 1.652   | 0.00032 | 0.00402 |
| homolog of rat pragma of Rnd2                                     | PRAGMIN                      | 1.603   | 0.00924 | 0.03338 |
| HOP homeobox                                                      | HOPX                         | -20.058 | 0.00436 | 0.02075 |
| hormonally up-regulated Neu-associated kinase                     | HUNK                         | 1.759   | 0.00592 | 0.02522 |
| HtrA serine peptidase 3                                           | HTRA3                        | 3.144   | 0.00046 | 0.00506 |
| human immunodeficiency virus type I enhancer binding protein 3    | HIVEP3                       | 1.505   | 0.01540 | 0.04633 |

|                                                                                  |                                  |         |         |         |
|----------------------------------------------------------------------------------|----------------------------------|---------|---------|---------|
| huntingtin interacting protein 1 related /// similar to KIAA0655 protein         | HIP1R ///<br>LOC100294412        | -1.941  | 0.00033 | 0.00405 |
| hyaluronan and proteoglycan link protein 1                                       | HAPLN1                           | 1.947   | 0.00591 | 0.02520 |
| hyaluronan synthase 1                                                            | HAS1                             | 1.717   | 0.03360 | 0.07693 |
| Hyaluronan synthase 2                                                            | HAS2                             | 2.497   | 0.00347 | 0.01794 |
| hydroxyacyl-Coenzyme A dehydrogenase                                             | HADH                             | -1.713  | 0.00462 | 0.02157 |
| hydroxy-delta-5-steroid dehydrogenase, 3 beta- and steroid delta-<br>isomerase 7 | HSD3B7                           | 2.097   | 0.00001 | 0.00040 |
| hydroxysteroid (17-beta) dehydrogenase 1                                         | HSD17B1                          | 1.510   | 0.00176 | 0.01166 |
| hydroxysteroid dehydrogenase like 2                                              | HSDL2                            | -1.531  | 0.04990 | 0.09837 |
| hyperpolarization activated cyclic nucleotide-gated potassium channel<br>1       | HCN1                             | 1.781   | 0.04130 | 0.08737 |
| hypothetical FLJ11235                                                            | FLJ11235                         | 3.082   | 0.00000 | 0.00003 |
| hypothetical FLJ39739                                                            | FLJ39739                         | 1.593   | 0.00008 | 0.00170 |
| hypothetical gene supported by AK022396; AK097927                                | FLJ12334                         | 2.047   | 0.00244 | 0.01428 |
| Hypothetical gene supported by AK096370                                          | FLJ39051                         | 1.948   | 0.00022 | 0.00315 |
| hypothetical gene supported by AK124342 /// hypothetical<br>LOC100131455         | FLJ42351 ///<br>LOC100131455     | 1.915   | 0.00000 | 0.00010 |
| Hypothetical gene supported by BC043549; BX648102                                | DKFZp686O1327                    | 1.878   | 0.01630 | 0.04803 |
| Hypothetical gene supported by BX647608                                          | LOC399959                        | 1.876   | 0.01030 | 0.03574 |
| hypothetical LOC100126784                                                        | LOC100126784                     | -2.807  | 0.00732 | 0.02887 |
| hypothetical LOC100128239                                                        | LOC100128239                     | 2.341   | 0.00003 | 0.00091 |
| hypothetical LOC100132707                                                        | LOC100132707                     | 1.574   | 0.01990 | 0.05490 |
| hypothetical LOC100190986                                                        | LOC100190986                     | -1.723  | 0.04550 | 0.09277 |
| hypothetical LOC100216479                                                        | LOC100216479                     | 2.780   | 0.00011 | 0.00207 |
| hypothetical LOC100216546                                                        | LOC100216546                     | 1.758   | 0.04340 | 0.09014 |
| hypothetical LOC100271722                                                        | hCG_2039027                      | 1.711   | 0.01220 | 0.03971 |
| hypothetical LOC100272216                                                        | LOC100272216                     | 1.867   | 0.01550 | 0.04653 |
| hypothetical LOC100272216 /// hypothetical protein LOC100292101                  | LOC100272216 ///<br>LOC100292101 | 2.342   | 0.00215 | 0.01325 |
| hypothetical LOC100272217                                                        | LOC100272217                     | 1.701   | 0.00229 | 0.01371 |
| hypothetical LOC100302650 /// ribokinase                                         | LOC100302650 ///<br>RBKS         | -5.366  | 0.00349 | 0.01800 |
| hypothetical LOC145788                                                           | FLJ27352                         | 1.645   | 0.00021 | 0.00303 |
| Hypothetical LOC150538                                                           | FLJ32063                         | 2.602   | 0.00000 | 0.00018 |
| hypothetical LOC151009                                                           | LOC151009                        | 2.494   | 0.00004 | 0.00109 |
| hypothetical LOC154761                                                           | LOC154761                        | 2.551   | 0.00029 | 0.00377 |
| hypothetical LOC253039                                                           | LOC253039                        | 2.167   | 0.00436 | 0.02075 |
| hypothetical LOC255031                                                           | FLJ35390                         | 1.647   | 0.00197 | 0.01259 |
| hypothetical LOC25845                                                            | LOC25845                         | 1.613   | 0.00009 | 0.00179 |
| hypothetical LOC283174                                                           | LOC283174                        | 1.813   | 0.00099 | 0.00811 |
| hypothetical LOC284297                                                           | LOC284297                        | 2.201   | 0.00013 | 0.00233 |
| hypothetical LOC284837                                                           | LOC284837                        | 1.728   | 0.00160 | 0.01100 |
| hypothetical LOC344595                                                           | LOC344595                        | 1.798   | 0.00095 | 0.00791 |
| hypothetical LOC378805                                                           | FLJ43663                         | -3.068  | 0.00497 | 0.02262 |
| hypothetical LOC399753                                                           | RP11-144G6.7                     | 1.672   | 0.01530 | 0.04618 |
| hypothetical LOC400043                                                           | LOC400043                        | 1.861   | 0.01080 | 0.03676 |
| hypothetical LOC401093                                                           | hCG_1806964                      | -16.657 | 0.00627 | 0.02614 |
| hypothetical LOC440465                                                           | FLJ90757                         | 2.034   | 0.00127 | 0.00949 |
| hypothetical LOC440944                                                           | LOC440944                        | 1.687   | 0.00028 | 0.00365 |
| hypothetical LOC441094                                                           | FLJ42709                         | 2.725   | 0.00459 | 0.02149 |
| hypothetical LOC441461                                                           | LOC441461                        | 1.812   | 0.00007 | 0.00156 |
| hypothetical LOC541471 /// non-protein coding RNA 152                            | LOC541471 ///<br>NCRNA00152      | 1.641   | 0.01580 | 0.04710 |

|                                                   |                           |         |         |         |
|---------------------------------------------------|---------------------------|---------|---------|---------|
| hypothetical LOC54744                             | DKFZp566H0824             | -1.642  | 0.02550 | 0.06439 |
| Hypothetical LOC642477                            | FLJ39632                  | 2.236   | 0.00749 | 0.02927 |
| hypothetical LOC642477 /// hypothetical LOC400879 | FLJ39632 ///<br>LOC400879 | 2.021   | 0.00521 | 0.02327 |
| hypothetical LOC642852                            | LOC642852                 | 1.587   | 0.02340 | 0.06090 |
| hypothetical LOC642946                            | LQK1                      | 2.105   | 0.00552 | 0.02418 |
| Hypothetical LOC643517                            | LOC643517                 | 1.519   | 0.00282 | 0.01559 |
| hypothetical LOC643733                            | LOC643733                 | 1.511   | 0.03770 | 0.08278 |
| hypothetical LOC643837                            | LOC643837                 | -2.339  | 0.01920 | 0.05365 |
| hypothetical LOC645722                            | LOC645722                 | -3.473  | 0.00902 | 0.03294 |
| hypothetical LOC647115                            | FLJ36848                  | -1.546  | 0.02110 | 0.05698 |
| hypothetical LOC650669                            | FLJ41484                  | 8.141   | 0.00000 | 0.00007 |
| Hypothetical LOC728264                            | LOC728264                 | -15.804 | 0.01950 | 0.05408 |
| Hypothetical LOC728431                            | LOC728431                 | 2.125   | 0.00000 | 0.00021 |
| hypothetical LOC729580                            | LOC729580                 | -1.659  | 0.00036 | 0.00428 |
| Hypothetical LOC730057                            | LOC730057                 | -3.257  | 0.00567 | 0.02460 |
| hypothetical LOC730101                            | LOC730101                 | 2.046   | 0.00028 | 0.00369 |
| hypothetical LOC730236                            | LOC730236                 | 1.636   | 0.00084 | 0.00733 |
| hypothetical LOC84856                             | LOC84856                  | 3.683   | 0.00072 | 0.00665 |
| hypothetical LOC84989                             | LOC84989                  | 1.542   | 0.01940 | 0.05399 |
| hypothetical protein DKFZp667E0512                | DKFZp667E0512             | -1.695  | 0.00914 | 0.03316 |
| hypothetical protein FLJ10357                     | FLJ10357                  | 1.942   | 0.00001 | 0.00040 |
| hypothetical protein FLJ22167                     | FLJ22167                  | 2.999   | 0.00000 | 0.00017 |
| hypothetical protein FLJ36031                     | FLJ36031                  | -1.874  | 0.00306 | 0.01646 |
| hypothetical protein LOC100127980                 | LOC100127980              | 1.899   | 0.00000 | 0.00030 |
| hypothetical protein LOC100127983                 | LOC100127983              | -3.512  | 0.00006 | 0.00150 |
| Hypothetical protein LOC100128718                 | LOC100128718              | 1.602   | 0.00933 | 0.03358 |
| Hypothetical protein LOC100129022                 | LOC100129022              | 1.908   | 0.00000 | 0.00010 |
| hypothetical protein LOC100129034                 | LOC100129034              | 1.627   | 0.00329 | 0.01727 |
| Hypothetical protein LOC100129282                 | LOC100129282              | 2.426   | 0.00398 | 0.01958 |
| hypothetical protein LOC100130468                 | LOC100130468              | 2.159   | 0.01880 | 0.05288 |
| Hypothetical protein LOC100130837                 | LOC100130837              | -1.731  | 0.00981 | 0.03463 |
| hypothetical protein LOC100132884                 | LOC100132884              | 1.501   | 0.00108 | 0.00857 |
| hypothetical protein LOC100132999                 | LOC100132999              | 1.530   | 0.00424 | 0.02038 |
| hypothetical protein LOC100287917                 | LOC100287917              | -2.953  | 0.03630 | 0.08083 |
| hypothetical protein LOC100288551                 | LOC100288551              | 2.029   | 0.00086 | 0.00743 |
| hypothetical protein LOC100288911                 | LOC100288911              | 1.623   | 0.03190 | 0.07458 |
| hypothetical protein LOC100290661                 | LOC100290661              | -7.423  | 0.03210 | 0.07482 |
| hypothetical protein LOC100293390                 | LOC100293390              | -4.311  | 0.03450 | 0.07817 |
| hypothetical protein LOC144481                    | LOC144481                 | -1.983  | 0.01170 | 0.03865 |
| hypothetical protein LOC144571                    | LOC144571                 | 1.881   | 0.00361 | 0.01843 |
| Hypothetical protein LOC149478                    | LOC149478                 | 1.574   | 0.02850 | 0.06912 |
| hypothetical protein LOC149832                    | LOC149832                 | -1.710  | 0.01540 | 0.04633 |
| Hypothetical protein LOC202451                    | LOC202451                 | 2.723   | 0.01250 | 0.04030 |
| hypothetical protein LOC221710                    | LOC221710                 | -1.810  | 0.00004 | 0.00118 |
| hypothetical protein LOC222070                    | LOC222070                 | 1.562   | 0.00020 | 0.00297 |
| hypothetical protein LOC255480                    | LOC255480                 | 1.811   | 0.00275 | 0.01533 |
| hypothetical protein LOC257396                    | LOC257396                 | 1.771   | 0.00113 | 0.00885 |
| hypothetical protein LOC283143                    | LOC283143                 | 2.571   | 0.00001 | 0.00051 |
| hypothetical protein LOC283278                    | LOC283278                 | 1.505   | 0.00517 | 0.02315 |
| hypothetical protein LOC283508                    | LOC283508                 | -1.762  | 0.00147 | 0.01042 |
| hypothetical protein LOC284542                    | LOC284542                 | -1.624  | 0.00964 | 0.03426 |



|                                                                                         |                     |         |         |         |
|-----------------------------------------------------------------------------------------|---------------------|---------|---------|---------|
| hypothetical protein LOC285758                                                          | LOC285758           | 3.888   | 0.00004 | 0.00105 |
| hypothetical protein LOC285812                                                          | LOC285812           | -6.393  | 0.00000 | 0.00004 |
| hypothetical protein LOC286052                                                          | LOC286052           | 1.514   | 0.00138 | 0.00999 |
| hypothetical protein LOC286071                                                          | LOC286071           | 1.529   | 0.00000 | 0.00025 |
| hypothetical protein LOC286272                                                          | LOC286272           | 1.580   | 0.04170 | 0.08797 |
| hypothetical protein LOC375295                                                          | LOC375295           | 6.576   | 0.00000 | 0.00020 |
| hypothetical protein LOC387763                                                          | LOC387763           | -4.969  | 0.00000 | 0.00010 |
| hypothetical protein LOC440119                                                          | FLJ31485            | 1.639   | 0.00095 | 0.00791 |
| Hypothetical protein LOC650392                                                          | LOC650392           | 1.730   | 0.01020 | 0.03553 |
| hypothetical protein LOC728392 /// NLR family, pyrin domain containing 1                | LOC728392 /// NLRP1 | 1.844   | 0.00007 | 0.00154 |
| hypothetical protein LOC729013                                                          | LOC729013           | 1.649   | 0.00230 | 0.01376 |
| hypothetical protein LOC729680                                                          | LOC729680           | 2.597   | 0.00003 | 0.00090 |
| hypothetical protein LOC729991                                                          | LOC729991           | -1.522  | 0.00321 | 0.01702 |
| hypothetical protein LOC730102                                                          | LOC730102           | 1.735   | 0.00017 | 0.00268 |
| hypoxia inducible factor 1, alpha subunit (basic helix-loop-helix transcription factor) | HIF1A               | -1.508  | 0.00161 | 0.01104 |
| hypoxia inducible factor 3, alpha subunit                                               | HIF3A               | -2.794  | 0.00000 | 0.00026 |
| IKAROS family zinc finger 1 (Ikaros)                                                    | IKZF1               | -2.146  | 0.04700 | 0.09475 |
| IKK interacting protein                                                                 | IKIP                | 1.657   | 0.00125 | 0.00941 |
| immediate early response 2                                                              | IER2                | -2.022  | 0.02710 | 0.06693 |
| immediate early response 5-like                                                         | IER5L               | 3.311   | 0.00005 | 0.00131 |
| immunoglobulin lambda locus                                                             | IGL@                | -22.148 | 0.03220 | 0.07497 |
| immunoglobulin superfamily containing leucine-rich repeat                               | ISLR                | 2.504   | 0.00018 | 0.00279 |
| immunoglobulin superfamily, member 11                                                   | IGSF11              | 1.868   | 0.02350 | 0.06108 |
| immunoglobulin superfamily, member 3                                                    | IGSF3               | 2.272   | 0.00042 | 0.00473 |
| immunoglobulin superfamily, member 6                                                    | IGSF6               | 2.006   | 0.00574 | 0.02478 |
| IMP (inosine monophosphate) dehydrogenase 1                                             | IMPDH1              | 1.732   | 0.00000 | 0.00013 |
| IMP1 inner mitochondrial membrane peptidase-like ( <i>S. cerevisiae</i> )               | IMMP1L              | -1.653  | 0.01640 | 0.04824 |
| importin 11                                                                             | IPO11               | -1.671  | 0.00971 | 0.03439 |
| importin 11 /// leucine rich repeat containing 70                                       | IPO11 /// LRRC70    | -1.706  | 0.00446 | 0.02104 |
| importin 7                                                                              | IPO7                | -1.700  | 0.00147 | 0.01042 |
| indolethylamine N-methyltransferase                                                     | INMT                | -2.517  | 0.00040 | 0.00461 |
| inhibin, beta B                                                                         | INHBB               | -2.248  | 0.00019 | 0.00288 |
| inhibitor of DNA binding 1, dominant negative helix-loop-helix protein                  | ID1                 | -1.548  | 0.04680 | 0.09448 |
| inhibitor of DNA binding 4, dominant negative helix-loop-helix protein                  | ID4                 | -1.788  | 0.03670 | 0.08139 |
| inhibitor of growth family, member 3                                                    | ING3                | -1.893  | 0.00390 | 0.01931 |
| inositol 1,3,4-triphosphate 5/6 kinase                                                  | ITPK1               | -1.938  | 0.00049 | 0.00524 |
| inositol 1,4,5-triphosphate receptor interacting protein                                | ITPRIP              | -1.959  | 0.00954 | 0.03404 |
| inositol 1,4,5-triphosphate receptor, type 1                                            | ITPR1               | -6.421  | 0.00014 | 0.00243 |
| inositol 1,4,5-triphosphate receptor, type 2                                            | ITPR2               | 1.594   | 0.00822 | 0.03106 |
| inositol 1,4,5-trisphosphate 3-kinase B                                                 | ITPKB               | 2.497   | 0.00000 | 0.00009 |
| inositol 1,4,5-trisphosphate 3-kinase C                                                 | ITPKC               | -1.879  | 0.00275 | 0.01533 |
| inositol hexakisphosphate kinase 2                                                      | IP6K2               | -2.202  | 0.02530 | 0.06411 |
| inositol polyphosphate-4-phosphatase, type II, 105kDa                                   | INPP4B              | -4.748  | 0.00843 | 0.03151 |
| inositol polyphosphate-5-phosphatase F                                                  | INPP5F              | 1.701   | 0.00001 | 0.00038 |
| inositol polyphosphate-5-phosphatase, 40kDa                                             | INPP5A              | -2.371  | 0.00554 | 0.02424 |
| inositol(myo)-1(or 4)-monophosphatase 1                                                 | IMPA1               | -1.766  | 0.00009 | 0.00186 |
| inositol(myo)-1(or 4)-monophosphatase 2                                                 | IMPA2               | -1.893  | 0.00258 | 0.01474 |
| insulin receptor                                                                        | INSR                | -1.869  | 0.00072 | 0.00665 |
| insulin receptor substrate 1                                                            | IRS1                | 1.791   | 0.00209 | 0.01304 |
| insulin receptor substrate 2                                                            | IRS2                | -3.286  | 0.00001 | 0.00054 |

|                                                              |         |         |         |         |
|--------------------------------------------------------------|---------|---------|---------|---------|
| insulin-like growth factor 1 (somatomedin C)                 | IGF1    | 1.896   | 0.00770 | 0.02973 |
| insulin-like growth factor 1 receptor                        | IGF1R   | -1.710  | 0.02040 | 0.05581 |
| insulin-like growth factor binding protein 2, 36kDa          | IGFBP2  | -10.170 | 0.00046 | 0.00507 |
| integrator complex subunit 6                                 | INTS6   | -2.130  | 0.00000 | 0.00008 |
| integrin, alpha 10                                           | ITGA10  | -4.642  | 0.00004 | 0.00117 |
| integrin, alpha 11                                           | ITGA11  | 1.860   | 0.00001 | 0.00049 |
| integrin, alpha 2 (CD49B, alpha 2 subunit of VLA-2 receptor) | ITGA2   | 3.771   | 0.00029 | 0.00372 |
| integrin, alpha 5 (fibronectin receptor, alpha polypeptide)  | ITGA5   | -3.392  | 0.00420 | 0.02026 |
| integrin, alpha 6                                            | ITGA6   | 1.704   | 0.00433 | 0.02066 |
| integrin, alpha 7                                            | ITGA7   | -12.854 | 0.01920 | 0.05365 |
| integrin, alpha 8                                            | ITGA8   | -6.988  | 0.00120 | 0.00917 |
| integrin, alpha 9                                            | ITGA9   | -1.664  | 0.00419 | 0.02022 |
| Integrin, beta-like 1 (with EGF-like repeat domains)         | ITGBL1  | 1.876   | 0.00051 | 0.00541 |
| intelectin 1 (galactofuranose binding)                       | ITLN1   | -4.776  | 0.00565 | 0.02455 |
| inter-alpha (globulin) inhibitor H3                          | ITI3H3  | -53.775 | 0.02930 | 0.07040 |
| inter-alpha (globulin) inhibitor H5                          | ITI5H5  | 2.397   | 0.00613 | 0.02584 |
| intercellular adhesion molecule 1                            | ICAM1   | 2.598   | 0.00019 | 0.00287 |
| intercellular adhesion molecule 2                            | ICAM2   | 1.973   | 0.00132 | 0.00973 |
| intercellular adhesion molecule 3                            | ICAM3   | 1.584   | 0.00003 | 0.00090 |
| interferon (alpha, beta and omega) receptor 2                | IFNAR2  | 1.713   | 0.00024 | 0.00336 |
| interferon induced with helicase C domain 1                  | IFIH1   | 1.672   | 0.00011 | 0.00207 |
| interferon regulatory factor 1                               | IRF1    | 1.556   | 0.00034 | 0.00413 |
| interferon, alpha-inducible protein 27                       | IFI27   | 2.152   | 0.02710 | 0.06693 |
| interferon-induced protein 35                                | IFI35   | 1.611   | 0.01100 | 0.03720 |
| Interferon-induced protein 44                                | IFI44   | 2.609   | 0.00009 | 0.00185 |
| interferon-induced protein with tetratricopeptide repeats 1  | IFIT1   | 2.930   | 0.00051 | 0.00537 |
| interferon-induced protein with tetratricopeptide repeats 2  | IFIT2   | 1.546   | 0.01060 | 0.03634 |
| interferon-induced protein with tetratricopeptide repeats 3  | IFIT3   | 1.656   | 0.01830 | 0.05201 |
| interleukin 1 receptor accessory protein                     | IL1RAP  | 1.923   | 0.03850 | 0.08384 |
| interleukin 1 receptor, type II                              | IL1R2   | -2.122  | 0.01870 | 0.05269 |
| Interleukin 1 receptor-like 1                                | IL1RL1  | -2.278  | 0.01950 | 0.05408 |
| interleukin 13 receptor, alpha 2                             | IL13RA2 | 5.137   | 0.00472 | 0.02190 |
| interleukin 15                                               | IL15    | 1.813   | 0.00405 | 0.01981 |
| interleukin 17 receptor B                                    | IL17RB  | 1.568   | 0.00326 | 0.01718 |
| interleukin 17 receptor D                                    | IL17RD  | 3.553   | 0.00000 | 0.00030 |
| interleukin 17D                                              | IL17D   | 1.881   | 0.00179 | 0.01177 |
| interleukin 6 (interferon, beta 2)                           | IL6     | -16.901 | 0.01160 | 0.03843 |
| interleukin 6 receptor                                       | IL6R    | -2.390  | 0.03390 | 0.07736 |
| interleukin 7                                                | IL7     | 3.220   | 0.00268 | 0.01509 |
| interleukin 7 receptor                                       | IL7R    | -5.577  | 0.00576 | 0.02481 |
| interleukin 8                                                | IL8     | -22.257 | 0.02770 | 0.06779 |
| interleukin-1 receptor-associated kinase 2                   | IRAK2   | 2.816   | 0.00000 | 0.00009 |
| interleukin-1 receptor-associated kinase 3                   | IRAK3   | -1.954  | 0.02050 | 0.05603 |
| intermediate filament family orphan 1                        | IFFO1   | 2.070   | 0.00000 | 0.00016 |
| intraflagellar transport 172 homolog (Chlamydomonas)         | IFT172  | 1.698   | 0.00119 | 0.00913 |
| IQ motif and Sec7 domain 1                                   | IQSEC1  | 1.805   | 0.00047 | 0.00511 |
| IQ motif containing E                                        | IQCE    | 1.701   | 0.00005 | 0.00129 |
| IQ motif containing G                                        | IQCG    | 1.931   | 0.00014 | 0.00239 |
| iron-sulfur cluster assembly 1 homolog (S. cerevisiae)       | ISCA1   | -1.809  | 0.00297 | 0.01614 |
| ISG15 ubiquitin-like modifier                                | ISG15   | 1.609   | 0.02030 | 0.05564 |
| isocitrate dehydrogenase 3 (NAD+) alpha                      | IDH3A   | -1.983  | 0.00512 | 0.02301 |

|                                                                             |             |         |         |         |
|-----------------------------------------------------------------------------|-------------|---------|---------|---------|
| isopentenyl-diphosphate delta isomerase 1                                   | IDI1        | -1.550  | 0.00621 | 0.02600 |
| Janus kinase 1                                                              | JAK1        | -1.870  | 0.03060 | 0.07247 |
| Janus kinase 2                                                              | JAK2        | -3.253  | 0.00047 | 0.00511 |
| janus kinase and microtubule interacting protein 2                          | JAKMIP2     | 5.692   | 0.00002 | 0.00080 |
| jumonji C domain containing histone demethylase 1 homolog D (S. cerevisiae) | JHDM1D      | -1.960  | 0.00466 | 0.02171 |
| jumonji domain containing 6                                                 | JMJD6       | -1.911  | 0.00000 | 0.00026 |
| jun B proto-oncogene                                                        | JUNB        | -4.424  | 0.00023 | 0.00328 |
| jun oncogene                                                                | JUN         | -2.685  | 0.02450 | 0.06273 |
| junction plakoglobin                                                        | JUP         | -2.063  | 0.00005 | 0.00129 |
| junctophilin 2                                                              | JPH2        | -29.610 | 0.02240 | 0.05919 |
| kalirin, RhoGEF kinase                                                      | KALRN       | -3.706  | 0.00036 | 0.00430 |
| kallikrein B, plasma (Fletcher factor) 1                                    | KLKB1       | 1.808   | 0.01790 | 0.05126 |
| Kallmann syndrome 1 sequence                                                | KAL1        | 3.123   | 0.00000 | 0.00004 |
| karyopherin alpha 4 (importin alpha 3)                                      | KPNA4       | -1.630  | 0.03000 | 0.07152 |
| kazrin                                                                      | RP1-21O18.1 | 1.605   | 0.00228 | 0.01368 |
| KDEL (Lys-Asp-Glu-Leu) containing 1                                         | KDEL1       | 1.854   | 0.00070 | 0.00653 |
| KDEL (Lys-Asp-Glu-Leu) endoplasmic reticulum protein retention receptor 3   | KDEL3       | 2.563   | 0.00000 | 0.00010 |
| kelch domain containing 5                                                   | KLHDC5      | -1.566  | 0.00196 | 0.01256 |
| kelch repeat and BTB (POZ) domain containing 6                              | KBTBD6      | 1.924   | 0.00002 | 0.00063 |
| kelch repeat and BTB (POZ) domain containing 7                              | KBTBD7      | 1.764   | 0.00019 | 0.00290 |
| kelch-like 13 (Drosophila)                                                  | KLHL13      | 2.490   | 0.00014 | 0.00237 |
| kelch-like 22 (Drosophila)                                                  | KLHL22      | 1.822   | 0.00177 | 0.01170 |
| kelch-like 23 (Drosophila)                                                  | KLHL23      | -2.295  | 0.00522 | 0.02330 |
| kelch-like 24 (Drosophila)                                                  | KLHL24      | -2.908  | 0.00784 | 0.03010 |
| kelch-like 6 (Drosophila)                                                   | KLHL6       | -1.567  | 0.04110 | 0.08721 |
| kelch-like 8 (Drosophila)                                                   | KLHL8       | -1.579  | 0.00008 | 0.00170 |
| keratin 18                                                                  | KRT18       | -7.466  | 0.00548 | 0.02409 |
| KH homology domain containing 1                                             | KHDC1       | 1.711   | 0.00302 | 0.01633 |
| KIAA0040                                                                    | KIAA0040    | 2.088   | 0.00577 | 0.02484 |
| KIAA0114                                                                    | KIAA0114    | -1.950  | 0.00620 | 0.02597 |
| KIAA0141                                                                    | KIAA0141    | -1.708  | 0.03140 | 0.07379 |
| KIAA0146                                                                    | KIAA0146    | -6.071  | 0.00039 | 0.00459 |
| KIAA0774                                                                    | KIAA0774    | -17.024 | 0.04260 | 0.08924 |
| KIAA1305                                                                    | KIAA1305    | 3.222   | 0.00001 | 0.00033 |
| KIAA1324-like                                                               | KIAA1324L   | 1.947   | 0.00267 | 0.01507 |
| KIAA1377                                                                    | KIAA1377    | 1.546   | 0.03910 | 0.08465 |
| KIAA1429                                                                    | KIAA1429    | -1.709  | 0.03240 | 0.07527 |
| KIAA1430                                                                    | KIAA1430    | 1.601   | 0.02420 | 0.06227 |
| KIAA1618                                                                    | KIAA1618    | 1.955   | 0.00040 | 0.00464 |
| KIAA1659 protein                                                            | KIAA1659    | -1.887  | 0.01650 | 0.04846 |
| KIAA1737                                                                    | KIAA1737    | -1.953  | 0.00037 | 0.00438 |
| KIAA1755                                                                    | KIAA1755    | 3.104   | 0.00075 | 0.00675 |
| KIAA1797                                                                    | KIAA1797    | 1.622   | 0.00003 | 0.00092 |
| KIAA1841                                                                    | KIAA1841    | 1.569   | 0.00010 | 0.00194 |
| kin of IRRE like 3 (Drosophila)                                             | KIRREL3     | 5.510   | 0.00010 | 0.00198 |
| kinase insert domain receptor (a type III receptor tyrosine kinase)         | KDR         | 2.535   | 0.00001 | 0.00051 |
| kinesin family member 3C                                                    | KIF3C       | 1.845   | 0.00775 | 0.02987 |
| KIT ligand                                                                  | KITLG       | 2.057   | 0.00655 | 0.02692 |
| klotho                                                                      | KL          | 2.575   | 0.00025 | 0.00338 |
| KN motif and ankyrin repeat domains 1                                       | KANK1       | -3.294  | 0.01510 | 0.04579 |

|                                                                  |          |         |         |         |
|------------------------------------------------------------------|----------|---------|---------|---------|
| KN motif and ankyrin repeat domains 3                            | KANK3    | -1.881  | 0.03820 | 0.08346 |
| kringle containing transmembrane protein 1                       | KREMEN1  | 1.568   | 0.02290 | 0.06004 |
| Kruppel-like factor 11                                           | KLF11    | -1.510  | 0.00060 | 0.00601 |
| Kruppel-like factor 15                                           | KLF15    | -4.146  | 0.00004 | 0.00109 |
| Kruppel-like factor 2 (lung)                                     | KLF2     | -1.794  | 0.01840 | 0.05217 |
| Kruppel-like factor 6                                            | KLF6     | -1.670  | 0.01550 | 0.04653 |
| Kruppel-like factor 7 (ubiquitous)                               | KLF7     | -1.745  | 0.00418 | 0.02021 |
| Kruppel-like factor 9                                            | KLF9     | -2.296  | 0.00048 | 0.00518 |
| kyphoscoliosis peptidase                                         | KY       | 3.235   | 0.01030 | 0.03574 |
| l(3)mbt-like (Drosophila)                                        | L3MBTL   | 2.247   | 0.00017 | 0.00272 |
| La ribonucleoprotein domain family, member 1B                    | LARP1B   | -1.695  | 0.00087 | 0.00744 |
| La ribonucleoprotein domain family, member 4                     | LARP4    | -1.938  | 0.00445 | 0.02101 |
| lactamase, beta                                                  | LACTB    | -1.832  | 0.00516 | 0.02313 |
| lactate dehydrogenase B                                          | LDHB     | -1.740  | 0.01280 | 0.04091 |
| LAG1 homolog, ceramide synthase 1                                | LASS1    | 2.509   | 0.00001 | 0.00033 |
| LAG1 homolog, ceramide synthase 4                                | LASS4    | 1.707   | 0.00015 | 0.00248 |
| LAG1 homolog, ceramide synthase 6                                | LASS6    | -2.544  | 0.00060 | 0.00595 |
| lamin A/C                                                        | LMNA     | 1.571   | 0.00336 | 0.01754 |
| lamin B receptor                                                 | LBR      | -1.523  | 0.00010 | 0.00195 |
| laminin, alpha 3                                                 | LAMA3    | -3.636  | 0.00242 | 0.01423 |
| laminin, alpha 4                                                 | LAMA4    | 1.904   | 0.00017 | 0.00270 |
| LAS1-like ( <i>S. cerevisiae</i> )                               | LAS1L    | -1.769  | 0.02440 | 0.06258 |
| latent transforming growth factor beta binding protein 4         | LTBP4    | 1.567   | 0.00258 | 0.01474 |
| latrophilin 1                                                    | LPHN1    | 1.702   | 0.00000 | 0.00018 |
| latrophilin 2                                                    | LPHN2    | -1.953  | 0.00176 | 0.01166 |
| latrophilin 3                                                    | LPHN3    | -13.261 | 0.01220 | 0.03971 |
| LATS, large tumor suppressor, homolog 2 (Drosophila)             | LATS2    | -1.651  | 0.00015 | 0.00247 |
| lectin, galactoside-binding, soluble, 8                          | LGALS8   | -2.053  | 0.01770 | 0.05084 |
| leiomodulin 1 (smooth muscle)                                    | LMOD1    | -15.716 | 0.00008 | 0.00176 |
| leptin receptor overlapping transcript-like 1                    | LEPROTL1 | 1.603   | 0.00352 | 0.01812 |
| lethal giant larvae homolog 1 (Drosophila)                       | LLGL1    | 1.612   | 0.00001 | 0.00049 |
| leucine proline-enriched proteoglycan (leprecan) 1               | LEPRE1   | 1.661   | 0.00136 | 0.00990 |
| leucine rich repeat (in FLII) interacting protein 2              | LRRFIP2  | -1.602  | 0.00467 | 0.02173 |
| leucine rich repeat and fibronectin type III domain containing 4 | LRFN4    | 1.769   | 0.00003 | 0.00090 |
| leucine rich repeat and fibronectin type III domain containing 5 | LRFN5    | 1.923   | 0.01150 | 0.03823 |
| leucine rich repeat and Ig domain containing 1                   | LINGO1   | 1.874   | 0.00329 | 0.01727 |
| leucine rich repeat containing 15                                | LRRC15   | 2.491   | 0.00548 | 0.02409 |
| leucine rich repeat containing 16A                               | LRRC16A  | -2.501  | 0.00221 | 0.01346 |
| leucine rich repeat containing 23                                | LRRC23   | 2.163   | 0.00022 | 0.00316 |
| leucine rich repeat containing 27                                | LRRC27   | 1.689   | 0.00002 | 0.00065 |
| leucine rich repeat containing 32                                | LRRC32   | -3.144  | 0.02210 | 0.05872 |
| leucine rich repeat containing 34                                | LRRC34   | 1.840   | 0.00168 | 0.01131 |
| leucine rich repeat containing 4C                                | LRRC4C   | 3.490   | 0.00047 | 0.00507 |
| leucine rich repeat containing 8 family, member A                | LRRC8A   | -2.260  | 0.00101 | 0.00819 |
| leucine rich repeat neuronal 1                                   | LRRN1    | 6.932   | 0.00066 | 0.00634 |
| leucine rich repeat transmembrane neuronal 4                     | LRRTM4   | 2.642   | 0.01160 | 0.03843 |
| leucine zipper, putative tumor suppressor 1                      | LZTS1    | 2.578   | 0.00002 | 0.00066 |
| leucine-rich PPR-motif containing                                | LRPPRC   | -1.715  | 0.00014 | 0.00239 |
| leucine-rich repeat LGI family, member 4                         | LGI4     | -1.767  | 0.00286 | 0.01573 |
| leucine-rich repeat-containing G protein-coupled receptor 6      | LGR6     | -9.131  | 0.02080 | 0.05655 |
| leucyl/cystinyl aminopeptidase                                   | LNPEP    | -1.841  | 0.00200 | 0.01271 |

|                                                                                             |                            |         |         |         |
|---------------------------------------------------------------------------------------------|----------------------------|---------|---------|---------|
| leukemia inhibitory factor receptor alpha                                                   | LIFR                       | -3.966  | 0.00000 | 0.00009 |
| leukocyte receptor tyrosine kinase                                                          | LTK                        | 1.909   | 0.00014 | 0.00242 |
| leukotriene C4 synthase                                                                     | LTC4S                      | 1.639   | 0.01450 | 0.04451 |
| ligand of numb-protein X 1                                                                  | LNK1                       | 1.561   | 0.00001 | 0.00056 |
| LIM and calponin homology domains 1                                                         | LIMCH1                     | 1.512   | 0.00055 | 0.00560 |
| LIM and senescent cell antigen-like domains 2                                               | LIMS2                      | -2.283  | 0.03630 | 0.08083 |
| LIM and senescent cell antigen-like domains 3-like                                          | LOC440895                  | 1.572   | 0.00164 | 0.01117 |
| LIM domain and actin binding 1                                                              | LIMA1                      | 1.691   | 0.00003 | 0.00096 |
| LIM domain binding 3                                                                        | LDB3                       | -92.996 | 0.02550 | 0.06439 |
| LIM domain containing preferred translocation partner in lipoma                             | LPP                        | -2.997  | 0.00354 | 0.01818 |
| LIM domain only 2 (rhombotin-like 1)                                                        | LMO2                       | 2.087   | 0.00015 | 0.00251 |
| LIM domain only 4                                                                           | LMO4                       | 1.826   | 0.01640 | 0.04824 |
| LIM homeobox 9                                                                              | LHX9                       | 2.515   | 0.04050 | 0.08643 |
| lin-52 homolog (C. elegans)                                                                 | LIN52                      | -1.515  | 0.00059 | 0.00592 |
| lin-7 homolog A (C. elegans)                                                                | LIN7A                      | -1.507  | 0.01850 | 0.05236 |
| lipase maturation factor 1                                                                  | LMF1                       | 1.938   | 0.00011 | 0.00203 |
| lipoic acid synthetase                                                                      | LIAS                       | -1.508  | 0.04260 | 0.08924 |
| lipoprotein lipase                                                                          | LPL                        | -13.170 | 0.00171 | 0.01148 |
| low density lipoprotein receptor                                                            | LDLR                       | -2.387  | 0.04110 | 0.08721 |
| low density lipoprotein receptor adaptor protein 1                                          | LDLRAP1                    | 1.865   | 0.00034 | 0.00413 |
| low density lipoprotein receptor class A domain containing 3                                | LDLRAD3                    | 1.651   | 0.01410 | 0.04372 |
| low density lipoprotein-related protein 1B (deleted in tumors)                              | LRP1B                      | -4.284  | 0.02200 | 0.05858 |
| LPS-responsive vesicle trafficking, beach and anchor containing                             | LRBA                       | 1.591   | 0.01110 | 0.03741 |
| LRRN4 C-terminal like                                                                       | LRRN4CL                    | 4.390   | 0.00002 | 0.00065 |
| Ly6/neurotoxin 1                                                                            | LYNX1                      | 2.242   | 0.00000 | 0.00021 |
| lymphocyte-specific protein 1                                                               | LSP1                       | 2.014   | 0.00004 | 0.00108 |
| lymphocyte-specific protein 1 pseudogene /// lymphocyte-specific protein 1 pseudogene       | LOC645166 ///<br>LOC654342 | 2.475   | 0.00135 | 0.00986 |
| lymphoid-restricted membrane protein                                                        | LRMP                       | 1.758   | 0.00121 | 0.00921 |
| LYR motif containing 1                                                                      | LYRM1                      | -1.590  | 0.00024 | 0.00331 |
| lysine (K)-specific demethylase 3A                                                          | KDM3A                      | -1.732  | 0.00033 | 0.00406 |
| lysine (K)-specific demethylase 4B                                                          | KDM4B                      | -1.702  | 0.03440 | 0.07802 |
| lysophosphatidic acid receptor 4                                                            | LPAR4                      | 2.459   | 0.00001 | 0.00035 |
| lysophosphatidic acid receptor 5                                                            | LPAR5                      | 1.837   | 0.01610 | 0.04767 |
| lysophosphatidylcholine acyltransferase 1                                                   | LPCAT1                     | 1.664   | 0.00060 | 0.00597 |
| lysophosphatidylcholine acyltransferase 4                                                   | LPCAT4                     | 1.564   | 0.00085 | 0.00734 |
| lysyl oxidase-like 1                                                                        | LOXL1                      | 1.763   | 0.00152 | 0.01065 |
| lysyl oxidase-like 2                                                                        | LOXL2                      | 3.788   | 0.00183 | 0.01197 |
| lysyl oxidase-like 3                                                                        | LOXL3                      | 1.849   | 0.00051 | 0.00538 |
| lysyl oxidase-like 4                                                                        | LOXL4                      | 2.076   | 0.01340 | 0.04229 |
| mab-21-like 1 (C. elegans)                                                                  | MAB21L1                    | 2.997   | 0.00101 | 0.00819 |
| macrophage stimulating, pseudogene 9                                                        | MSTP9                      | 1.584   | 0.00166 | 0.01125 |
| major facilitator superfamily domain containing 5                                           | MFSD5                      | 1.976   | 0.00005 | 0.00132 |
| major vault protein                                                                         | MVP                        | 1.615   | 0.00005 | 0.00134 |
| makorin ring finger protein 1                                                               | MKRN1                      | -1.754  | 0.00173 | 0.01156 |
| mal, T-cell differentiation protein-like                                                    | MALL                       | 1.966   | 0.00305 | 0.01644 |
| malonyl-CoA decarboxylase                                                                   | MLYCD                      | -2.468  | 0.00133 | 0.00977 |
| mannan-binding lectin serine peptidase 1 (C4/C2 activating component of Ra-reactive factor) | MASP1                      | 1.749   | 0.03040 | 0.07216 |
| mannose receptor, C type 2                                                                  | MRC2                       | 1.594   | 0.00060 | 0.00594 |
| mannosidase, alpha, class 1B, member 1                                                      | MAN1B1                     | 1.734   | 0.00237 | 0.01403 |
| mannosidase, alpha, class 1C, member 1                                                      | MAN1C1                     | 2.249   | 0.00053 | 0.00550 |

|                                                                                        |                           |         |         |         |
|----------------------------------------------------------------------------------------|---------------------------|---------|---------|---------|
| mannosyl (alpha-1,3-)-glycoprotein beta-1,4-N-acetylglucosaminyltransferase, isozyme B | MGAT4B                    | 1.836   | 0.00466 | 0.02171 |
| MAP kinase interacting serine/threonine kinase 2                                       | MKNK2                     | -1.657  | 0.00004 | 0.00117 |
| MARVEL domain containing 2                                                             | MARVELD2                  | 1.549   | 0.00066 | 0.00630 |
| mastermind-like domain containing 1                                                    | MAMLD1                    | 1.818   | 0.00049 | 0.00526 |
| matrix metalloproteinase 16 (membrane-inserted)                                        | MMP16                     | 4.045   | 0.00002 | 0.00074 |
| matrix metalloproteinase 19                                                            | MMP19                     | -2.511  | 0.04190 | 0.08827 |
| matrix metalloproteinase 2 (gelatinase A, 72kDa gelatinase, 72kDa type IV collagenase) | MMP2                      | 1.566   | 0.00773 | 0.02981 |
| matrix metalloproteinase 3 (stromelysin 1, progelatinase)                              | MMP3                      | -9.000  | 0.04530 | 0.09251 |
| matrix-remodelling associated 5                                                        | MXRA5                     | 3.228   | 0.00000 | 0.00024 |
| matrix-remodelling associated 7                                                        | MXRA7                     | 1.577   | 0.00650 | 0.02679 |
| MAX dimerization protein 1                                                             | MXD1                      | -1.635  | 0.00525 | 0.02338 |
| MAX interactor 1                                                                       | MXI1                      | -1.566  | 0.00000 | 0.00025 |
| MCF.2 cell line derived transforming sequence                                          | MCF2                      | 1.791   | 0.00714 | 0.02839 |
| McKusick-Kaufman syndrome                                                              | MKKS                      | -1.981  | 0.01680 | 0.04903 |
| MDS1 and EVI1 complex locus                                                            | MECOM                     | 1.800   | 0.00040 | 0.00460 |
| mediator complex subunit 13-like                                                       | MED13L                    | -1.783  | 0.03710 | 0.08195 |
| mediator complex subunit 21                                                            | MED21                     | -1.883  | 0.00712 | 0.02836 |
| mediator complex subunit 22                                                            | MED22                     | 1.587   | 0.00007 | 0.00161 |
| mediator complex subunit 28                                                            | MED28                     | -1.628  | 0.00035 | 0.00424 |
| melanocortin 1 receptor (alpha melanocyte stimulating hormone receptor)                | MC1R                      | 1.531   | 0.00006 | 0.00146 |
| melanocortin 2 receptor accessory protein 2                                            | MRAP2                     | 2.290   | 0.00163 | 0.01112 |
| melanoma antigen family D, 1                                                           | MAGED1                    | 1.626   | 0.00052 | 0.00543 |
| melanoma antigen family D, 4 /// melanoma antigen family D, 4B                         | MAGED4 ///<br>MAGED4B     | 2.731   | 0.01340 | 0.04229 |
| melanoma antigen family E, 1                                                           | MAGEE1                    | 2.196   | 0.00003 | 0.00089 |
| melanoma antigen family E, 2                                                           | MAGEE2                    | 1.932   | 0.00006 | 0.00141 |
| melanoma associated antigen (mutated) 1                                                | MUM1                      | 1.549   | 0.00035 | 0.00424 |
| melanoma associated antigen (mutated) 1-like 1                                         | MUM1L1                    | -87.716 | 0.00008 | 0.00176 |
| melanoma cell adhesion molecule                                                        | MCAM                      | -25.220 | 0.00126 | 0.00945 |
| melanoregulin                                                                          | MREG                      | 1.851   | 0.00072 | 0.00662 |
| membrane associated guanylate kinase, WW and PDZ domain containing 3                   | MAGI3                     | 1.956   | 0.00000 | 0.00002 |
| membrane protein, palmitoylated 5 (MAGUK p55 subfamily member 5)                       | MPP5                      | 1.559   | 0.00195 | 0.01252 |
| membrane protein, palmitoylated 7 (MAGUK p55 subfamily member 7)                       | MPP7                      | -38.123 | 0.01960 | 0.05427 |
| membrane-associated ring finger (C3HC4) 5                                              | 5-Mar                     | -1.517  | 0.01150 | 0.03823 |
| meningioma (disrupted in balanced translocation) 1                                     | MN1                       | 1.705   | 0.00729 | 0.02879 |
| mesenchyme homeobox 1                                                                  | MEOX1                     | 4.233   | 0.00004 | 0.00103 |
| mesoderm specific transcript homolog (mouse)                                           | MEST                      | 2.210   | 0.01090 | 0.03700 |
| metallophosphoesterase domain containing 2                                             | MPPED2                    | 1.937   | 0.00228 | 0.01368 |
| metallothionein 1 pseudogene 2                                                         | MT1P2                     | -3.472  | 0.00001 | 0.00044 |
| metallothionein 1E                                                                     | MT1E                      | -3.578  | 0.00001 | 0.00036 |
| metallothionein 1E /// metallothionein 1H /// metallothionein 1M                       | MT1E /// MT1H ///<br>MT1M | -3.667  | 0.00000 | 0.00025 |
| metallothionein 1F                                                                     | MT1F                      | -4.350  | 0.00001 | 0.00051 |
| metallothionein 1G                                                                     | MT1G                      | -3.232  | 0.00007 | 0.00160 |
| metallothionein 1H                                                                     | MT1H                      | -3.558  | 0.00002 | 0.00061 |
| metallothionein 1M                                                                     | MT1M                      | -3.699  | 0.00902 | 0.03294 |
| metallothionein 1X                                                                     | MT1X                      | -4.333  | 0.00000 | 0.00029 |
| metallothionein 2A                                                                     | MT2A                      | -4.179  | 0.00000 | 0.00017 |
| metastasis associated lung adenocarcinoma transcript 1 (non-protein coding)            | MALAT1                    | -1.709  | 0.00171 | 0.01148 |

|                                                                                                      |          |          |         |         |
|------------------------------------------------------------------------------------------------------|----------|----------|---------|---------|
| methionine adenosyltransferase II, alpha                                                             | MAT2A    | -1.519   | 0.00002 | 0.00069 |
| methionine sulfoxide reductase B3                                                                    | MSRB3    | -1.570   | 0.01500 | 0.04561 |
| methionyl aminopeptidase 1                                                                           | METAP1   | -1.691   | 0.01900 | 0.05324 |
| methylcrotonoyl-Coenzyme A carboxylase 1 (alpha)                                                     | MCCC1    | -1.602   | 0.00017 | 0.00269 |
| methylcrotonoyl-Coenzyme A carboxylase 2 (beta)                                                      | MCCC2    | -1.663   | 0.02050 | 0.05603 |
| methylenetetrahydrofolate dehydrogenase (NADP+ dependent) 2, methenyltetrahydrofolate cyclohydrolase | MTHFD2   | -3.991   | 0.00000 | 0.00029 |
| methylenetetrahydrofolate dehydrogenase (NADP+ dependent) 2-like                                     | MTHFD2L  | -1.995   | 0.01740 | 0.05024 |
| methylmalonic aciduria (cobalamin deficiency) cblA type                                              | MMAA     | 1.644    | 0.00061 | 0.00601 |
| methyltransferase like 9                                                                             | METTL9   | -1.512   | 0.01790 | 0.05126 |
| mex-3 homolog D (C. elegans)                                                                         | MEX3D    | 1.900    | 0.01100 | 0.03720 |
| microfibrillar-associated protein 2                                                                  | MFAP2    | 2.280    | 0.00042 | 0.00473 |
| microfibrillar-associated protein 3-like                                                             | MFAP3L   | 2.003    | 0.00720 | 0.02853 |
| microsomal glutathione S-transferase 1                                                               | MGST1    | -2.248   | 0.04120 | 0.08727 |
| microtubule-associated protein 2                                                                     | MAP2     | -1.643   | 0.04600 | 0.09346 |
| microtubule-associated protein tau                                                                   | MAPT     | 1.713    | 0.01120 | 0.03762 |
| minichromosome maintenance complex component 2                                                       | MCM2     | 1.681    | 0.00003 | 0.00101 |
| missing oocyte, meiosis regulator, homolog (Drosophila)                                              | MIOS     | -1.534   | 0.00001 | 0.00061 |
| mitochondrial ribosomal protein L10                                                                  | MRPL10   | -1.593   | 0.00959 | 0.03416 |
| mitochondrial ribosomal protein L30                                                                  | MRPL30   | -1.919   | 0.00395 | 0.01948 |
| mitochondrial ribosomal protein S15                                                                  | MRPS15   | -1.535   | 0.03160 | 0.07408 |
| mitochondrial ribosomal protein S25                                                                  | MRPS25   | -1.677   | 0.01080 | 0.03676 |
| mitochondrial ribosomal protein S36                                                                  | MRPS36   | -1.750   | 0.00663 | 0.02713 |
| mitochondrial tumor suppressor 1                                                                     | MTUS1    | -2.479   | 0.03930 | 0.08491 |
| mitogen-activated protein kinase kinase 6                                                            | MAP2K6   | -2.767   | 0.03060 | 0.07247 |
| mitogen-activated protein kinase kinase kinase 5                                                     | MAP3K5   | -2.299   | 0.00078 | 0.00695 |
| mitogen-activated protein kinase kinase kinase 6                                                     | MAP3K6   | -1.628   | 0.00165 | 0.01120 |
| mitogen-activated protein kinase kinase kinase 8                                                     | MAP3K8   | -1.705   | 0.00988 | 0.03482 |
| mitogen-activated protein kinase kinase kinase kinase 4                                              | MAP4K4   | 1.597    | 0.00041 | 0.00471 |
| mixed lineage kinase domain-like                                                                     | MLKL     | 1.615    | 0.01580 | 0.04710 |
| MOB1, Mps One Binder kinase activator-like 2B (yeast)                                                | MOBKL2B  | -2.576   | 0.00436 | 0.02075 |
| modulator of apoptosis 1                                                                             | MOAP1    | -1.606   | 0.00386 | 0.01921 |
| mohawk homeobox                                                                                      | MKX      | -2.323   | 0.03840 | 0.08370 |
| monoamine oxidase A                                                                                  | MAOA     | -3.582   | 0.00000 | 0.00004 |
| MORC family CW-type zinc finger 4                                                                    | MORC4    | 1.536    | 0.01190 | 0.03910 |
| Mov10, Moloney leukemia virus 10, homolog (mouse)                                                    | MOV10    | 1.567    | 0.00077 | 0.00689 |
| M-phase phosphoprotein 8                                                                             | MPHOSPH8 | -2.141   | 0.00244 | 0.01428 |
| msh homeobox 1                                                                                       | MSX1     | 2.345    | 0.00140 | 0.01009 |
| MSTP150                                                                                              | MST150   | -1.793   | 0.00464 | 0.02164 |
| MTERF domain containing 3                                                                            | MTERFD3  | -2.378   | 0.00054 | 0.00555 |
| multimerin 1                                                                                         | MMRN1    | -1.839   | 0.02090 | 0.05673 |
| multiple EGF-like-domains 10                                                                         | MEGF10   | 3.578    | 0.00065 | 0.00623 |
| multiple EGF-like-domains 6                                                                          | MEGF6    | 1.553    | 0.00541 | 0.02388 |
| murine retrovirus integration site 1 homolog                                                         | MRVI1    | -23.959  | 0.04520 | 0.09237 |
| Muscleblind-like (Drosophila)                                                                        | MBNL1    | -2.005   | 0.02080 | 0.05655 |
| musculoskeletal, embryonic nuclear protein 1                                                         | MUSTN1   | -208.066 | 0.00367 | 0.01861 |
| muskelin 1, intracellular mediator containing kelch motifs                                           | MKLN1    | -1.627   | 0.00176 | 0.01166 |
| mutated in colorectal cancers                                                                        | MCC      | 1.753    | 0.00006 | 0.00146 |
| myc target 1                                                                                         | MYCT1    | -3.172   | 0.04870 | 0.09691 |
| myelin expression factor 2                                                                           | MYEF2    | 1.708    | 0.04480 | 0.09192 |
| myeloid cell leukemia sequence 1 (BCL2-related)                                                      | MCL1     | -2.709   | 0.00003 | 0.00099 |
| myeloid cell nuclear differentiation antigen                                                         | MNDA     | 2.257    | 0.02710 | 0.06693 |

|                                                                                                                                       |                           |          |         |         |
|---------------------------------------------------------------------------------------------------------------------------------------|---------------------------|----------|---------|---------|
| myeloid leukemia factor 1                                                                                                             | MLF1                      | -2.709   | 0.03740 | 0.08236 |
| myeloid/lymphoid or mixed-lineage leukemia (trithorax homolog, <i>Drosophila</i> ); translocated to, 3                                | MLLT3                     | 1.718    | 0.00141 | 0.01015 |
| myocardin                                                                                                                             | MYOCD                     | -149.351 | 0.00123 | 0.00930 |
| myosin IE                                                                                                                             | MYO1E                     | -2.182   | 0.00034 | 0.00415 |
| myosin light chain kinase                                                                                                             | MYLK                      | -5.893   | 0.00059 | 0.00589 |
| myosin regulatory light chain interacting protein                                                                                     | MYLIP                     | 1.626    | 0.00127 | 0.00949 |
| myosin VB                                                                                                                             | MYO5B                     | 1.522    | 0.00791 | 0.03027 |
| myosin X                                                                                                                              | MYO10                     | -6.376   | 0.00388 | 0.01926 |
| myosin, heavy chain 11, smooth muscle                                                                                                 | MYH11                     | -33.342  | 0.00010 | 0.00193 |
| myosin, light chain 9, regulatory                                                                                                     | MYL9                      | -13.434  | 0.02720 | 0.06705 |
| myotilin                                                                                                                              | MYOT                      | -7.443   | 0.02140 | 0.05743 |
| myotubularin related protein 11                                                                                                       | MTMR11                    | 1.918    | 0.00129 | 0.00958 |
| myozenin 1                                                                                                                            | MYOZ1                     | -3.044   | 0.03860 | 0.08403 |
| myozenin 3                                                                                                                            | MYOZ3                     | 5.062    | 0.00000 | 0.00029 |
| myristoylated alanine-rich protein kinase C substrate                                                                                 | MARCKS                    | 1.503    | 0.00071 | 0.00661 |
| myxovirus (influenza virus) resistance 1, interferon-inducible protein p78 (mouse)                                                    | MX1                       | 1.645    | 0.01930 | 0.05384 |
| myxovirus (influenza virus) resistance 2 (mouse)                                                                                      | MX2                       | 1.753    | 0.01100 | 0.03720 |
| N-6 adenine-specific DNA methyltransferase 1 (putative)                                                                               | N6AMT1                    | -1.635   | 0.00917 | 0.03322 |
| N-acetylated alpha-linked acidic dipeptidase 2                                                                                        | NAALAD2                   | 1.677    | 0.01710 | 0.04964 |
| N-acetylgalactosaminidase, alpha-                                                                                                     | NAGA                      | 1.746    | 0.00052 | 0.00547 |
| N-acetyltransferase 11 (GCN5-related, putative)                                                                                       | NAT11                     | 1.859    | 0.00014 | 0.00238 |
| N-acetyltransferase 14 (GCN5-related, putative)                                                                                       | NAT14                     | 2.389    | 0.00001 | 0.00047 |
| N-acetyltransferase 2 (arylamine N-acetyltransferase)                                                                                 | NAT2                      | 2.142    | 0.00024 | 0.00331 |
| N-acylsphingosine amidohydrolase (acid ceramidase) 1                                                                                  | ASAH1                     | -1.563   | 0.04520 | 0.09237 |
| NAD kinase                                                                                                                            | NADK                      | -1.967   | 0.00009 | 0.00186 |
| NADH dehydrogenase (ubiquinone) 1 alpha subcomplex, 2, 8kDa                                                                           | NDUFA2                    | -1.645   | 0.01140 | 0.03802 |
| NADH dehydrogenase (ubiquinone) 1 alpha subcomplex, 4, 9kDa                                                                           | NDUFA4                    | -1.922   | 0.02370 | 0.06141 |
| NADH dehydrogenase (ubiquinone) 1 alpha subcomplex, assembly factor 4                                                                 | NDUFAF4                   | -2.139   | 0.02860 | 0.06929 |
| NADH dehydrogenase (ubiquinone) Fe-S protein 2, 49kDa (NADH-coenzyme Q reductase)                                                     | NDUFS2                    | -1.817   | 0.01180 | 0.03884 |
| nanos homolog 1 ( <i>Drosophila</i> )                                                                                                 | NANOS1                    | 5.268    | 0.00048 | 0.00519 |
| natriuretic peptide receptor C/guanylate cyclase C (atrionatriuretic peptide receptor C)                                              | NPR3                      | -5.620   | 0.00954 | 0.03404 |
| NCK interacting protein with SH3 domain                                                                                               | NCKIPSD                   | -1.521   | 0.00113 | 0.00885 |
| NDC80 homolog, kinetochore complex component ( <i>S. cerevisiae</i> )                                                                 | NDC80                     | 1.614    | 0.04470 | 0.09177 |
| nephronectin                                                                                                                          | NPNT                      | -45.363  | 0.00000 | 0.00015 |
| netrin 1                                                                                                                              | NTN1                      | 1.609    | 0.00052 | 0.00543 |
| netrin 4                                                                                                                              | NTN4                      | 1.601    | 0.00063 | 0.00615 |
| neutralized homolog 1B ( <i>Drosophila</i> )                                                                                          | NEURL1B                   | -4.094   | 0.00057 | 0.00580 |
| neurexin 2                                                                                                                            | NRXN2                     | 2.276    | 0.00114 | 0.00890 |
| neurexophilin 3                                                                                                                       | NXPH3                     | 1.926    | 0.00177 | 0.01170 |
| neuritin 1                                                                                                                            | NRN1                      | -4.026   | 0.02860 | 0.06929 |
| neurobeachin-like 1                                                                                                                   | NBEAL1                    | -2.030   | 0.03010 | 0.07169 |
| neuroblastoma breakpoint family, member 1                                                                                             | NBPF1                     | 2.353    | 0.00071 | 0.00661 |
| neuroblastoma breakpoint family, member 1 /// neuroblastoma breakpoint family, member 3 /// neuroblastoma breakpoint family, member 8 | NBPF1 /// NBPF3 /// NBPF8 | 2.154    | 0.00173 | 0.01156 |
| neuroblastoma breakpoint family, member 10                                                                                            | NBPF10                    | 1.502    | 0.04000 | 0.08582 |
| neuroblastoma breakpoint family, member 3                                                                                             | NBPF3                     | 2.299    | 0.00000 | 0.00004 |
| neuroepithelial cell transforming 1                                                                                                   | NET1                      | -1.850   | 0.00116 | 0.00899 |
| neurofascin homolog (chicken)                                                                                                         | NFASC                     | -9.221   | 0.00942 | 0.03379 |



|                                                                                                                                                       |                |         |         |         |
|-------------------------------------------------------------------------------------------------------------------------------------------------------|----------------|---------|---------|---------|
| neurogranin (protein kinase C substrate, RC3)                                                                                                         | NRGN           | -1.981  | 0.02980 | 0.07116 |
| neuron navigator 1                                                                                                                                    | NAV1           | 1.996   | 0.00229 | 0.01371 |
| neuron navigator 2                                                                                                                                    | NAV2           | -2.488  | 0.00001 | 0.00059 |
| neuronal growth regulator 1                                                                                                                           | NEGR1          | 1.681   | 0.02770 | 0.06779 |
| neuronal PAS domain protein 2                                                                                                                         | NPAS2          | -2.295  | 0.01730 | 0.05006 |
| neuronal PAS domain protein 3                                                                                                                         | NPAS3          | 1.953   | 0.00683 | 0.02760 |
| neuro-oncological ventral antigen 1                                                                                                                   | NOVA1          | 2.801   | 0.00120 | 0.00917 |
| neuropilin (NRP) and tolloid (TLL)-like 2                                                                                                             | NETO2          | 3.732   | 0.01220 | 0.03971 |
| neuropilin 1                                                                                                                                          | NRP1           | 1.503   | 0.01390 | 0.04334 |
| neurotrimin                                                                                                                                           | NTM            | 3.059   | 0.00541 | 0.02388 |
| neurotrophic tyrosine kinase, receptor, type 2                                                                                                        | NTRK2          | 1.504   | 0.01040 | 0.03593 |
| neurotrophic tyrosine kinase, receptor, type 3                                                                                                        | NTRK3          | -2.621  | 0.04560 | 0.09293 |
| neurotrophin 3                                                                                                                                        | NTF3           | -15.594 | 0.00937 | 0.03368 |
| nexilin (F actin binding protein)                                                                                                                     | NEXN           | -10.539 | 0.00002 | 0.00073 |
| NHL repeat containing 3                                                                                                                               | NHLRC3         | 1.654   | 0.00246 | 0.01434 |
| NHS-like 1                                                                                                                                            | NHSL1          | 2.709   | 0.00301 | 0.01629 |
| Nicotinamide phosphoribosyltransferase                                                                                                                | NAMPT          | -5.124  | 0.01710 | 0.04964 |
| nidogen 1                                                                                                                                             | NID1           | -2.627  | 0.00005 | 0.00130 |
| NIMA (never in mitosis gene a)- related kinase 11                                                                                                     | NEK11          | 1.913   | 0.00065 | 0.00626 |
| NIMA (never in mitosis gene a)-related kinase 6                                                                                                       | NEK6           | 1.831   | 0.00446 | 0.02104 |
| ninein (GSK3B interacting protein)                                                                                                                    | NIN            | 1.518   | 0.00042 | 0.00475 |
| ninjurin 1                                                                                                                                            | NINJ1          | 1.913   | 0.00000 | 0.00005 |
| Nipped-B homolog (Drosophila)                                                                                                                         | NIPBL          | -1.592  | 0.01480 | 0.04516 |
| N-myc (and STAT) interactor                                                                                                                           | NMI            | 1.675   | 0.00027 | 0.00361 |
| non-metastatic cells 6, protein expressed in (nucleoside-diphosphate kinase)                                                                          | NME6           | 1.718   | 0.00063 | 0.00616 |
| non-protein coding RNA 117                                                                                                                            | NCRNA00117     | 1.755   | 0.00001 | 0.00045 |
| non-protein coding RNA 188                                                                                                                            | NCRNA00188     | -1.543  | 0.00464 | 0.02164 |
| non-protein coding RNA 94                                                                                                                             | NCRNA00094     | 1.610   | 0.00054 | 0.00556 |
| non-SMC condensin II complex, subunit G2                                                                                                              | NCAPG2         | 1.514   | 0.00639 | 0.02646 |
| NOP16 nucleolar protein homolog (yeast)                                                                                                               | NOP16          | -3.251  | 0.00018 | 0.00281 |
| Norrie disease (pseudoglioma)                                                                                                                         | NDP            | 6.771   | 0.00584 | 0.02506 |
| Notch homolog 2 (Drosophila)                                                                                                                          | NOTCH2         | 1.541   | 0.00010 | 0.00195 |
| Notch homolog 3 (Drosophila)                                                                                                                          | NOTCH3         | -3.868  | 0.02530 | 0.06411 |
| N-terminal EF-hand calcium binding protein 3                                                                                                          | NECAB3         | -2.318  | 0.00738 | 0.02900 |
| nuclear factor I/B                                                                                                                                    | NFIB           | 1.607   | 0.01190 | 0.03910 |
| nuclear factor I/X (CCAAT-binding transcription factor)                                                                                               | NFIX           | 1.757   | 0.00003 | 0.00088 |
| nuclear factor of activated T-cells, cytoplasmic, calcineurin-dependent 1                                                                             | NFATC1         | 1.600   | 0.00382 | 0.01912 |
| nuclear factor of kappa light polypeptide gene enhancer in B-cells inhibitor, alpha                                                                   | NFKBIA         | -2.314  | 0.00006 | 0.00140 |
| nuclear factor of kappa light polypeptide gene enhancer in B-cells inhibitor, zeta                                                                    | NFKBIZ         | -2.245  | 0.00276 | 0.01537 |
| nuclear factor, interleukin 3 regulated                                                                                                               | NFIL3          | -11.339 | 0.00000 | 0.00003 |
| nuclear receptor coactivator 3                                                                                                                        | NCOA3          | -1.703  | 0.02000 | 0.05509 |
| nuclear receptor subfamily 1, group D, member 1 /// thyroid hormone receptor, alpha (erythroblastic leukemia viral (v-erb-a) oncogene homolog, avian) | NR1D1 /// THRA | 1.851   | 0.01890 | 0.05309 |
| nuclear receptor subfamily 1, group D, member 2                                                                                                       | NR1D2          | 2.203   | 0.00640 | 0.02649 |
| Nuclear receptor subfamily 2, group F, member 1                                                                                                       | NR2F1          | 2.809   | 0.00353 | 0.01814 |
| nuclear receptor subfamily 2, group F, member 2                                                                                                       | NR2F2          | -2.325  | 0.02070 | 0.05639 |
| nuclear receptor subfamily 3, group C, member 2                                                                                                       | NR3C2          | 2.070   | 0.00039 | 0.00459 |
| nuclear receptor subfamily 4, group A, member 1                                                                                                       | NR4A1          | -20.353 | 0.00001 | 0.00043 |
| nuclear receptor subfamily 4, group A, member 2                                                                                                       | NR4A2          | -16.705 | 0.00226 | 0.01362 |

|                                                                                                                                          |               |         |         |         |
|------------------------------------------------------------------------------------------------------------------------------------------|---------------|---------|---------|---------|
| nuclear receptor subfamily 4, group A, member 3                                                                                          | NR4A3         | -23.615 | 0.01500 | 0.04561 |
| nuclear RNA export factor 3                                                                                                              | NXF3          | 1.568   | 0.01510 | 0.04579 |
| nuclear transcription factor Y, beta                                                                                                     | NFYB          | -1.768  | 0.00000 | 0.00008 |
| nucleobindin 2                                                                                                                           | NUCB2         | 1.605   | 0.00014 | 0.00238 |
| nucleoporin 98kDa                                                                                                                        | NUP98         | -2.114  | 0.00247 | 0.01438 |
| nucleoporin like 1                                                                                                                       | NUPL1         | -1.904  | 0.00001 | 0.00051 |
| nucleoredoxin                                                                                                                            | NXN           | -1.818  | 0.04350 | 0.09019 |
| nucleosome assembly protein 1-like 1                                                                                                     | NAP1L1        | -1.501  | 0.00108 | 0.00857 |
| nudix (nucleoside diphosphate linked moiety X)-type motif 10                                                                             | NUDT10        | -2.941  | 0.01670 | 0.04885 |
| nudix (nucleoside diphosphate linked moiety X)-type motif 11                                                                             | NUDT11        | -2.346  | 0.00117 | 0.00904 |
| nudix (nucleoside diphosphate linked moiety X)-type motif 16                                                                             | NUDT16        | -2.468  | 0.00028 | 0.00369 |
| nudix (nucleoside diphosphate linked moiety X)-type motif 18                                                                             | NUDT18        | 1.585   | 0.00021 | 0.00313 |
| nudix (nucleoside diphosphate linked moiety X)-type motif 4                                                                              | NUDT4         | -3.200  | 0.00101 | 0.00819 |
| nudix (nucleoside diphosphate linked moiety X)-type motif 4 /// nudix (nucleoside diphosphate linked moiety X)-type motif 4 pseudogene 1 | NUDT4P1       | -3.229  | 0.00001 | 0.00044 |
| nudix (nucleoside diphosphate linked moiety X)-type motif 6                                                                              | NUDT6         | 1.583   | 0.01400 | 0.04354 |
| OAF homolog (Drosophila)                                                                                                                 | OAF           | 2.383   | 0.00000 | 0.00028 |
| occludin/ELL domain containing 1                                                                                                         | OCEL1         | 1.746   | 0.00000 | 0.00003 |
| OCIA domain containing 2                                                                                                                 | OCIAD2        | 2.262   | 0.00094 | 0.00787 |
| odd-skipped related 1 (Drosophila)                                                                                                       | OSR1          | 3.509   | 0.00191 | 0.01236 |
| olfactomedin 1                                                                                                                           | OLFM1         | 1.573   | 0.00274 | 0.01530 |
| olfactomedin-like 1                                                                                                                      | OLFML1        | 2.293   | 0.00027 | 0.00360 |
| opioid growth factor receptor-like 1                                                                                                     | OGFRL1        | -2.389  | 0.00912 | 0.03313 |
| opioid receptor, kappa 1                                                                                                                 | OPRK1         | 4.625   | 0.02440 | 0.06258 |
| opsin 3                                                                                                                                  | OPN3          | -1.737  | 0.00165 | 0.01120 |
| optic atrophy 1 (autosomal dominant)                                                                                                     | OPA1          | -1.605  | 0.04910 | 0.09742 |
| ORAI calcium release-activated calcium modulator 2                                                                                       | ORAI2         | 2.341   | 0.00009 | 0.00180 |
| ornithine decarboxylase 1                                                                                                                | ODC1          | -2.073  | 0.00101 | 0.00819 |
| O-sialoglycoprotein endopeptidase-like 1                                                                                                 | OSGEPL1       | 1.602   | 0.01310 | 0.04162 |
| OTU domain containing 7B                                                                                                                 | OTUD7B        | -1.885  | 0.02910 | 0.07011 |
| oxidase (cytochrome c) assembly 1-like                                                                                                   | OXA1L         | -1.501  | 0.01740 | 0.05024 |
| oxidative stress induced growth inhibitor family member 2                                                                                | OSGIN2        | 2.285   | 0.00010 | 0.00195 |
| oxysterol binding protein-like 10                                                                                                        | OSBPL10       | 2.188   | 0.00053 | 0.00551 |
| oxysterol binding protein-like 6                                                                                                         | OSBPL6        | 1.641   | 0.01160 | 0.03843 |
| p21 protein (Cdc42/Rac)-activated kinase 2                                                                                               | PAK2          | -1.952  | 0.01530 | 0.04618 |
| paired related homeobox 2                                                                                                                | PRRX2         | 1.639   | 0.00105 | 0.00840 |
| palladin, cytoskeletal associated protein                                                                                                | PALLD         | -2.091  | 0.00044 | 0.00488 |
| palmdelphin                                                                                                                              | PALMD         | 2.634   | 0.00294 | 0.01603 |
| PAP associated domain containing 5                                                                                                       | PAPD5         | -1.693  | 0.00019 | 0.00290 |
| par-6 partitioning defective 6 homolog beta (C. elegans)                                                                                 | PARD6B        | -2.141  | 0.00076 | 0.00686 |
| par-6 partitioning defective 6 homolog gamma (C. elegans)                                                                                | PARD6G        | 1.597   | 0.00613 | 0.02584 |
| Paralemmin-3                                                                                                                             | PALM3         | 1.947   | 0.00144 | 0.01031 |
| paraneoplastic antigen MA2                                                                                                               | PNMA2         | 1.810   | 0.00141 | 0.01015 |
| paraoxonase 2                                                                                                                            | PON2          | -1.541  | 0.00515 | 0.02312 |
| parathyroid hormone-like hormone                                                                                                         | PTHLH         | 1.690   | 0.03140 | 0.07379 |
| partner of NOB1 homolog (S. cerevisiae)                                                                                                  | PNO1          | -1.538  | 0.00748 | 0.02926 |
| parvin, alpha                                                                                                                            | PARVA         | -1.729  | 0.02650 | 0.06607 |
| paternally expressed 3 /// zinc finger, imprinted 2                                                                                      | PEG3 /// ZIM2 | 1.666   | 0.00370 | 0.01870 |
| PBX/knotted 1 homeobox 2                                                                                                                 | PKNOX2        | 3.032   | 0.00000 | 0.00007 |
| PCF11, cleavage and polyadenylation factor subunit, homolog (S. cerevisiae)                                                              | PCF11         | -1.569  | 0.00707 | 0.02824 |
| PDX1 C-terminal inhibiting factor 1                                                                                                      | PCIF1         | -1.800  | 0.00004 | 0.00113 |

|                                                                                        |                     |          |         |         |
|----------------------------------------------------------------------------------------|---------------------|----------|---------|---------|
| PDZ and LIM domain 3                                                                   | PDLIM3              | 1.725    | 0.00790 | 0.03026 |
| PDZ and LIM domain 5                                                                   | PDLIM5              | -3.540   | 0.00277 | 0.01539 |
| PDZ and LIM domain 7 (enigma)                                                          | PDLIM7              | 2.143    | 0.00611 | 0.02578 |
| PDZ domain containing ring finger 3                                                    | PDZRN3              | 1.588    | 0.01670 | 0.04885 |
| pecanex homolog (Drosophila)                                                           | PCNX                | -1.609   | 0.00172 | 0.01151 |
| pellino homolog 2 (Drosophila)                                                         | PELI2               | -1.568   | 0.02900 | 0.06994 |
| Pelota homolog (Drosophila)                                                            | PELO                | -1.958   | 0.04430 | 0.09121 |
| peptidase domain containing associated with muscle regeneration 1                      | PAMR1               | 2.440    | 0.00003 | 0.00091 |
| peptidylprolyl isomerase (cyclophilin)-like 4 /// zinc finger CCCH-type containing 12D | PPIL4 /// ZC3H12D   | -2.361   | 0.01050 | 0.03614 |
| peptidylprolyl isomerase C (cyclophilin C)                                             | PPIC                | 1.572    | 0.00482 | 0.02221 |
| perforin 1 (pore forming protein)                                                      | PRF1                | -1.544   | 0.00983 | 0.03469 |
| perilipin 2                                                                            | PLIN2               | -3.823   | 0.00001 | 0.00047 |
| period homolog 1 (Drosophila)                                                          | PER1                | -2.701   | 0.00167 | 0.01128 |
| period homolog 2 (Drosophila)                                                          | PER2                | 1.520    | 0.01780 | 0.05103 |
| period homolog 3 (Drosophila)                                                          | PER3                | 2.715    | 0.00042 | 0.00473 |
| peripherin                                                                             | PRPH                | 1.863    | 0.00249 | 0.01444 |
| peroxidasin homolog (Drosophila)                                                       | PXDN                | 2.254    | 0.00012 | 0.00218 |
| peroxiredoxin 6                                                                        | PRDX6               | -1.745   | 0.00103 | 0.00830 |
| peroxisomal membrane protein 2, 22kDa                                                  | PXMP2               | -1.822   | 0.00126 | 0.00945 |
| peroxisome proliferator-activated receptor alpha                                       | PPARA               | -1.683   | 0.01370 | 0.04289 |
| PHD finger protein 11                                                                  | PHF11               | 1.773    | 0.00212 | 0.01315 |
| PHD finger protein 17                                                                  | PHF17               | -3.051   | 0.00001 | 0.00057 |
| PHD finger protein 20                                                                  | PHF20               | -1.574   | 0.00032 | 0.00400 |
| phosducin-like 3 pseudogene /// phosducin-like 3                                       | LOC285359 /// PDCL3 | -2.210   | 0.02350 | 0.06108 |
| phosphatase and tensin homolog                                                         | PTEN                | -1.646   | 0.00197 | 0.01259 |
| phosphatase and tensin homolog /// phosphatase and tensin homolog pseudogene 1         | PTEN /// PTENP1     | -1.577   | 0.00000 | 0.00009 |
| phosphatase, orphan 2                                                                  | PHOSPHO2            | 1.726    | 0.00342 | 0.01774 |
| phosphatidic acid phosphatase type 2 domain containing 1A                              | PPAPDC1A            | 4.185    | 0.03140 | 0.07379 |
| phosphatidic acid phosphatase type 2 domain containing 1B                              | PPAPDC1B            | 1.829    | 0.00104 | 0.00835 |
| phosphatidic acid phosphatase type 2 domain containing 2                               | PPAPDC2             | 1.968    | 0.00039 | 0.00454 |
| phosphatidylethanolamine-binding protein 4                                             | PEBP4               | -5.014   | 0.01110 | 0.03741 |
| phosphatidylinositol glycan anchor biosynthesis, class M                               | PIGM                | 1.738    | 0.00662 | 0.02710 |
| phosphatidylinositol glycan anchor biosynthesis, class Z                               | PIGZ                | 1.782    | 0.00024 | 0.00330 |
| phosphatidylinositol transfer protein, cytoplasmic 1                                   | PITPNC1             | -1.981   | 0.01060 | 0.03634 |
| phosphodiesterase 2A, cGMP-stimulated                                                  | PDE2A               | -2.490   | 0.00271 | 0.01520 |
| phosphodiesterase 4A, cAMP-specific (phosphodiesterase E2 dunce homolog, Drosophila)   | PDE4A               | 1.772    | 0.00009 | 0.00179 |
| phosphodiesterase 4D interacting protein                                               | PDE4DIP             | -1.726   | 0.01960 | 0.05427 |
| phosphodiesterase 4D, cAMP-specific (phosphodiesterase E3 dunce homolog, Drosophila)   | PDE4D               | -3.384   | 0.03200 | 0.07469 |
| phosphodiesterase 7B                                                                   | PDE7B               | 1.833    | 0.01530 | 0.04618 |
| phosphoglucomutase 2-like 1                                                            | PGM2L1              | 1.696    | 0.00967 | 0.03433 |
| phosphoglucomutase 3                                                                   | PGM3                | 1.783    | 0.00007 | 0.00159 |
| phosphoinositide-3-kinase, catalytic, alpha polypeptide                                | PIK3CA              | -1.984   | 0.00000 | 0.00008 |
| phosphoinositide-3-kinase, class 2, beta polypeptide                                   | PIK3C2B             | 1.964    | 0.00039 | 0.00454 |
| phosphoinositide-3-kinase, regulatory subunit 1 (alpha)                                | PIK3R1              | -2.096   | 0.00307 | 0.01650 |
| phosphoinositide-3-kinase, regulatory subunit 2 (beta)                                 | PIK3R2              | 1.590    | 0.00004 | 0.00120 |
| phosphoinositide-interacting regulator of transient receptor potential channels        | hCG_1776018         | 5.458    | 0.00000 | 0.00005 |
| phospholamban                                                                          | PLN                 | -187.746 | 0.00158 | 0.01090 |
| phospholipase A1 member A                                                              | PLA1A               | -8.034   | 0.02370 | 0.06141 |

|                                                                                                                                                                                               |                        |        |         |         |
|-----------------------------------------------------------------------------------------------------------------------------------------------------------------------------------------------|------------------------|--------|---------|---------|
| phospholipase A2, group IVA (cytosolic, calcium-dependent)                                                                                                                                    | PLA2G4A                | 1.863  | 0.00131 | 0.00967 |
| phospholipase A2, group V                                                                                                                                                                     | PLA2G5                 | -5.568 | 0.00000 | 0.00003 |
| phospholipase C, beta 1 (phosphoinositide-specific)                                                                                                                                           | PLCB1                  | 1.619  | 0.03490 | 0.07869 |
| Phospholipase C, beta 4                                                                                                                                                                       | PLCB4                  | 1.588  | 0.00729 | 0.02879 |
| phospholipase C, delta 4                                                                                                                                                                      | PLCD4                  | 1.827  | 0.00001 | 0.00058 |
| phospholipase C, eta 1                                                                                                                                                                        | PLCH1                  | 1.850  | 0.00635 | 0.02635 |
| phospholipase C-like 1                                                                                                                                                                        | PLCL1                  | -2.582 | 0.00168 | 0.01131 |
| phosphoprotein enriched in astrocytes 15                                                                                                                                                      | PEA15                  | -1.924 | 0.00357 | 0.01828 |
| phosphoribosyl transferase domain containing 1                                                                                                                                                | PRTFDC1                | 1.613  | 0.00398 | 0.01958 |
| phosphorylase kinase, alpha 1 (muscle)                                                                                                                                                        | PHKA1                  | -2.028 | 0.00260 | 0.01480 |
| phosphoserine aminotransferase 1                                                                                                                                                              | PSAT1                  | 2.678  | 0.00121 | 0.00921 |
| phosphoserine phosphatase                                                                                                                                                                     | PSPH                   | 1.535  | 0.02240 | 0.05919 |
| phosphotriesterase related                                                                                                                                                                    | PTER                   | 1.621  | 0.01060 | 0.03634 |
| phytanoyl-CoA dioxygenase domain containing 1                                                                                                                                                 | PHYHD1                 | -1.512 | 0.00401 | 0.01969 |
| placenta-specific 9                                                                                                                                                                           | PLAC9                  | 1.717  | 0.00495 | 0.02258 |
| plakophilin 2                                                                                                                                                                                 | PKP2                   | -9.518 | 0.00924 | 0.03338 |
| plasma membrane proteolipid (plasmolipin)                                                                                                                                                     | PLLP                   | -2.470 | 0.02080 | 0.05655 |
| plasminogen activator, tissue                                                                                                                                                                 | PLAT                   | 2.930  | 0.00144 | 0.01031 |
| plasminogen activator, urokinase                                                                                                                                                              | PLAU                   | 1.986  | 0.00226 | 0.01362 |
| plasticity related gene 1                                                                                                                                                                     | LPPR4                  | 5.497  | 0.00255 | 0.01464 |
| platelet endothelial aggregation receptor 1                                                                                                                                                   | PEAR1                  | -3.857 | 0.00001 | 0.00047 |
| platelet/endothelial cell adhesion molecule                                                                                                                                                   | PECAM1                 | -4.753 | 0.03490 | 0.07869 |
| pleckstrin and Sec7 domain containing 3                                                                                                                                                       | PSD3                   | 2.597  | 0.00001 | 0.00042 |
| pleckstrin homology domain containing, family A (phosphoinositide binding specific) member 8                                                                                                  | PLEKHA8                | 1.590  | 0.00001 | 0.00040 |
| pleckstrin homology domain containing, family A (phosphoinositide binding specific) member 8 /// pleckstrin homology domain containing, family A (phosphoinositide binding specific) member 9 | PLEKHA8 ///<br>PLEKHA9 | 2.887  | 0.00001 | 0.00048 |
| pleckstrin homology domain containing, family A member 5                                                                                                                                      | PLEKHA5                | 1.551  | 0.00406 | 0.01982 |
| pleckstrin homology domain containing, family A member 6                                                                                                                                      | PLEKHA6                | 2.223  | 0.04000 | 0.08582 |
| pleckstrin homology domain containing, family A member 7                                                                                                                                      | PLEKHA7                | 2.103  | 0.00497 | 0.02262 |
| pleckstrin homology domain containing, family B (evectins) member 1                                                                                                                           | PLEKHB1                | 4.343  | 0.00023 | 0.00328 |
| pleckstrin homology domain containing, family G (with RhoGef domain) member 1                                                                                                                 | PLEKHG1                | 3.891  | 0.00203 | 0.01284 |
| pleckstrin homology domain containing, family G (with RhoGef domain) member 4                                                                                                                 | PLEKHG4                | 1.696  | 0.00165 | 0.01120 |
| pleckstrin homology domain containing, family O member 2                                                                                                                                      | PLEKHO2                | 1.879  | 0.00004 | 0.00113 |
| pleckstrin homology-like domain, family A, member 2                                                                                                                                           | PHLDA2                 | 2.666  | 0.00084 | 0.00728 |
| pleckstrin homology-like domain, family A, member 3                                                                                                                                           | PHLDA3                 | 1.792  | 0.00001 | 0.00060 |
| plexin A2                                                                                                                                                                                     | PLXNA2                 | 1.772  | 0.00116 | 0.00899 |
| plexin A3                                                                                                                                                                                     | PLXNA3                 | 1.884  | 0.00000 | 0.00019 |
| plexin C1                                                                                                                                                                                     | PLXNC1                 | 1.920  | 0.00043 | 0.00485 |
| plexin domain containing 1                                                                                                                                                                    | PLXDC1                 | 4.113  | 0.00044 | 0.00487 |
| PNMA-like 1                                                                                                                                                                                   | PNMAL1                 | 1.641  | 0.01470 | 0.04495 |
| PNMA-like 2                                                                                                                                                                                   | PNMAL2                 | 1.888  | 0.00000 | 0.00020 |
| podocalyxin-like                                                                                                                                                                              | PODXL                  | 2.378  | 0.01060 | 0.03634 |
| podocan                                                                                                                                                                                       | PODN                   | -1.708 | 0.04970 | 0.09810 |
| poly (ADP-ribose) polymerase family, member 9                                                                                                                                                 | PARP9                  | 1.903  | 0.00117 | 0.00904 |
| poly(A) binding protein interacting protein 2B                                                                                                                                                | PAIP2B                 | -2.079 | 0.01860 | 0.05251 |
| poly(A) binding protein, cytoplasmic 4 (inducible form)                                                                                                                                       | PABPC4                 | -1.906 | 0.00066 | 0.00632 |
| poly(A) binding protein, cytoplasmic 4-like                                                                                                                                                   | PABPC4L                | 2.118  | 0.00184 | 0.01201 |
| poly(A) polymerase alpha                                                                                                                                                                      | PAPOLA                 | -1.506 | 0.00225 | 0.01360 |
| poly(rC) binding protein 2                                                                                                                                                                    | PCBP2                  | -1.504 | 0.04770 | 0.09571 |

|                                                                                   |                     |         |         |         |
|-----------------------------------------------------------------------------------|---------------------|---------|---------|---------|
| polycomb group ring finger 2                                                      | PCGF2               | 1.569   | 0.00000 | 0.00013 |
| polycomb group ring finger 5                                                      | PCGF5               | -1.901  | 0.00970 | 0.03438 |
| polycystic kidney and hepatic disease 1 (autosomal recessive)-like 1              | PKHD1L1             | -10.474 | 0.02130 | 0.05732 |
| polyhomeotic homolog 2 (Drosophila)                                               | PHC2                | -2.232  | 0.00000 | 0.00019 |
| polyhomeotic homolog 3 (Drosophila)                                               | PHC3                | -1.567  | 0.00360 | 0.01839 |
| polymerase (DNA directed), eta                                                    | POLH                | 2.303   | 0.00001 | 0.00058 |
| polymerase (DNA-directed), epsilon 4 (p12 subunit)                                | POLE4               | -1.733  | 0.00002 | 0.00082 |
| polypyrimidine tract binding protein 2                                            | PTBP2               | -1.549  | 0.00713 | 0.02837 |
| POM121 membrane glycoprotein-like 9 (rat) pseudogene                              | POM121L9P           | -2.827  | 0.01090 | 0.03700 |
| potassium channel tetramerisation domain containing 10                            | KCTD10              | -1.653  | 0.02100 | 0.05688 |
| potassium channel tetramerisation domain containing 11                            | KCTD11              | 2.021   | 0.00005 | 0.00126 |
| potassium channel tetramerisation domain containing 14                            | KCTD14              | 1.727   | 0.00014 | 0.00243 |
| potassium channel tetramerisation domain containing 4                             | KCTD4               | 6.088   | 0.00000 | 0.00011 |
| potassium channel tetramerisation domain containing 7                             | KCTD7               | 1.582   | 0.00036 | 0.00433 |
| potassium channel, subfamily K, member 17                                         | KCNK17              | 2.304   | 0.00781 | 0.03002 |
| potassium channel, subfamily K, member 3                                          | KCNK3               | -21.617 | 0.01850 | 0.05236 |
| potassium inwardly-rectifying channel, subfamily J, member 12                     | KCNJ12              | 2.511   | 0.00001 | 0.00049 |
| potassium large conductance calcium-activated channel, subfamily M, beta member 4 | KCNMB4              | 1.594   | 0.00908 | 0.03306 |
| potassium voltage-gated channel, delayed-rectifier, subfamily S, member 3         | KCNS3               | 3.426   | 0.00001 | 0.00053 |
| potassium voltage-gated channel, Isk-related family, member 3                     | KCNE3               | 1.796   | 0.01350 | 0.04247 |
| potassium voltage-gated channel, Isk-related family, member 4                     | KCNE4               | 3.144   | 0.00013 | 0.00228 |
| potassium voltage-gated channel, KQT-like subfamily, member 5                     | KCNQ5               | -6.398  | 0.00863 | 0.03201 |
| potassium voltage-gated channel, shaker-related subfamily, member 5               | KCNA5               | -19.180 | 0.00320 | 0.01698 |
| POU class 6 homeobox 1                                                            | POU6F1              | 1.699   | 0.00783 | 0.03007 |
| PR domain containing 11                                                           | PRDM11              | -2.341  | 0.00002 | 0.00069 |
| PR domain containing 2, with ZNF domain                                           | PRDM2               | -1.607  | 0.00000 | 0.00004 |
| prenylcysteine oxidase 1 like                                                     | PCYOX1L             | 1.900   | 0.00004 | 0.00107 |
| prickle homolog 1 (Drosophila)                                                    | PRICKLE1            | 3.616   | 0.00019 | 0.00290 |
| PRKC, apoptosis, WT1, regulator                                                   | PAWR                | -6.092  | 0.00221 | 0.01346 |
| procollagen C-endopeptidase enhancer                                              | PCOLCE              | 1.584   | 0.00238 | 0.01407 |
| procollagen C-endopeptidase enhancer 2                                            | PCOLCE2             | 1.555   | 0.01300 | 0.04135 |
| procollagen-lysine 1, 2-oxoglutarate 5-dioxygenase 1                              | PLOD1               | 1.671   | 0.00008 | 0.00171 |
| progesterone and adipoQ receptor family member IV                                 | PAQR4               | 1.709   | 0.00000 | 0.00016 |
| programmed cell death 1 ligand 2                                                  | PDCD1LG2            | 1.925   | 0.00213 | 0.01319 |
| programmed cell death 4 (neoplastic transformation inhibitor)                     | PDCD4               | -2.067  | 0.04340 | 0.09014 |
| programmed cell death 6 pseudogene                                                | LOC728613           | -2.264  | 0.01870 | 0.05269 |
| programmed cell death 6 pseudogene /// programmed cell death 6                    | LOC728613 /// PDCD6 | -2.280  | 0.00885 | 0.03260 |
| proline rich 16                                                                   | PRR16               | -2.414  | 0.01270 | 0.04072 |
| proline rich 5 like                                                               | PRR5L               | 9.512   | 0.00000 | 0.00003 |
| proline rich Gla (G-carboxyglutamic acid) 1                                       | PRRG1               | -2.998  | 0.00005 | 0.00124 |
| proline-rich coiled-coil 1                                                        | PRRC1               | 1.775   | 0.00329 | 0.01727 |
| proline-rich nuclear receptor coactivator 1                                       | PNRC1               | -1.696  | 0.00000 | 0.00004 |
| proline-rich transmembrane protein 1                                              | PRRT1               | 1.731   | 0.00275 | 0.01533 |
| proline-rich transmembrane protein 3                                              | PRRT3               | 1.793   | 0.00008 | 0.00174 |
| proline-serine-threonine phosphatase interacting protein 1                        | PSTPIP1             | 5.179   | 0.00000 | 0.00015 |
| proline-serine-threonine phosphatase interacting protein 2                        | PSTPIP2             | -2.195  | 0.00389 | 0.01928 |
| prolyl 4-hydroxylase, alpha polypeptide II                                        | P4HA2               | 2.069   | 0.00012 | 0.00220 |
| proprotein convertase subtilisin/kexin type 6                                     | PCSK6               | 2.498   | 0.01030 | 0.03574 |
| prospero homeobox 1                                                               | PROX1               | -7.546  | 0.03990 | 0.08571 |
| prostaglandin D2 receptor (DP)                                                    | PTGDR               | 1.817   | 0.02030 | 0.05564 |

|                                                                                                                                                                                                               |                                          |         |         |         |
|---------------------------------------------------------------------------------------------------------------------------------------------------------------------------------------------------------------|------------------------------------------|---------|---------|---------|
| prostaglandin E synthase                                                                                                                                                                                      | PTGES                                    | 3.229   | 0.00000 | 0.00002 |
| prostaglandin F receptor (FP)                                                                                                                                                                                 | PTGFR                                    | 6.458   | 0.00010 | 0.00201 |
| prostaglandin F2 receptor negative regulator                                                                                                                                                                  | PTGFRN                                   | 1.825   | 0.00114 | 0.00890 |
| prostaglandin I2 (prostacyclin) receptor (IP)                                                                                                                                                                 | PTGIR                                    | 1.631   | 0.00288 | 0.01578 |
| prostaglandin-endoperoxide synthase 2 (prostaglandin G/H synthase and cyclooxygenase)                                                                                                                         | PTGS2                                    | -20.874 | 0.00213 | 0.01319 |
| prostate transmembrane protein, androgen induced 1                                                                                                                                                            | PMEPA1                                   | 1.812   | 0.00181 | 0.01187 |
| prostatic androgen-repressed message-1                                                                                                                                                                        | DKFZP564O0823                            | -3.591  | 0.00033 | 0.00410 |
| proteasome (prosome, macropain) 26S subunit, non-ATPase, 12                                                                                                                                                   | PSMD12                                   | -1.511  | 0.00937 | 0.03368 |
| proteasome (prosome, macropain) activator subunit 4                                                                                                                                                           | PSME4                                    | -1.581  | 0.00173 | 0.01156 |
| proteasome (prosome, macropain) subunit, beta type, 9 (large multifunctional peptidase 2)                                                                                                                     | PSMB9                                    | 1.682   | 0.00580 | 0.02491 |
| protein disulfide isomerase family A, member 2                                                                                                                                                                | PDIA2                                    | 1.539   | 0.01630 | 0.04803 |
| protein disulfide isomerase family A, member 4                                                                                                                                                                | PDIA4                                    | 1.543   | 0.00029 | 0.00373 |
| protein inhibitor of activated STAT, 1                                                                                                                                                                        | PIAS1                                    | -1.975  | 0.00000 | 0.00016 |
| protein kinase C and casein kinase substrate in neurons 2                                                                                                                                                     | PACSN2                                   | -1.846  | 0.00041 | 0.00470 |
| protein kinase C, alpha                                                                                                                                                                                       | PRKCA                                    | 1.834   | 0.00021 | 0.00304 |
| protein kinase C, beta                                                                                                                                                                                        | PRKCB                                    | -4.703  | 0.00761 | 0.02955 |
| protein kinase, AMP-activated, alpha 2 catalytic subunit                                                                                                                                                      | PRKAA2                                   | -13.622 | 0.04680 | 0.09448 |
| protein kinase, AMP-activated, gamma 2 non-catalytic subunit                                                                                                                                                  | PRKAG2                                   | -5.076  | 0.00030 | 0.00384 |
| protein kinase, cAMP-dependent, regulatory, type II, beta                                                                                                                                                     | PRKAR2B                                  | -2.435  | 0.02950 | 0.07069 |
| protein kinase-like protein Sgk493                                                                                                                                                                            | SGK493                                   | -1.801  | 0.00023 | 0.00324 |
| protein phosphatase 1, regulatory (inhibitor) subunit 12A                                                                                                                                                     | PPP1R12A                                 | -1.994  | 0.03190 | 0.07458 |
| protein phosphatase 1, regulatory (inhibitor) subunit 12B                                                                                                                                                     | PPP1R12B                                 | -15.561 | 0.00499 | 0.02265 |
| protein phosphatase 1, regulatory (inhibitor) subunit 12C                                                                                                                                                     | PPP1R12C                                 | -1.796  | 0.00620 | 0.02597 |
| protein phosphatase 1, regulatory (inhibitor) subunit 14A                                                                                                                                                     | PPP1R14A                                 | -8.842  | 0.00266 | 0.01503 |
| protein phosphatase 1, regulatory (inhibitor) subunit 15A                                                                                                                                                     | PPP1R15A                                 | -2.154  | 0.00023 | 0.00328 |
| protein phosphatase 1, regulatory (inhibitor) subunit 16B                                                                                                                                                     | PPP1R16B                                 | -1.875  | 0.01340 | 0.04229 |
| protein phosphatase 1, regulatory (inhibitor) subunit 3E                                                                                                                                                      | PPP1R3E                                  | 1.541   | 0.00307 | 0.01650 |
| protein phosphatase 1A (formerly 2C), magnesium-dependent, alpha isoform                                                                                                                                      | PPM1A                                    | -1.657  | 0.01690 | 0.04924 |
| protein phosphatase 1B (formerly 2C), magnesium-dependent, beta isoform                                                                                                                                       | PPM1B                                    | -2.857  | 0.00000 | 0.00008 |
| protein phosphatase 1F (PP2C domain containing)                                                                                                                                                               | PPM1F                                    | 1.564   | 0.00091 | 0.00772 |
| protein phosphatase 1K (PP2C domain containing)                                                                                                                                                               | PPM1K                                    | -2.469  | 0.00244 | 0.01428 |
| protein phosphatase 2, regulatory subunit B', alpha isoform                                                                                                                                                   | PPP2R5A                                  | -1.535  | 0.02340 | 0.06090 |
| protein phosphatase 3 (formerly 2B), catalytic subunit, gamma isoform                                                                                                                                         | PPP3CC                                   | -1.570  | 0.00002 | 0.00067 |
| protein tyrosine phosphatase, receptor type, D                                                                                                                                                                | PTPRD                                    | 1.574   | 0.04280 | 0.08947 |
| protein tyrosine phosphatase, receptor type, F                                                                                                                                                                | PTPRF                                    | 1.774   | 0.00120 | 0.00917 |
| protein tyrosine phosphatase, receptor type, f polypeptide (PTPRF), interacting protein (liprin), alpha 2                                                                                                     | PPFIA2                                   | -1.513  | 0.03380 | 0.07723 |
| protein tyrosine phosphatase, receptor type, G                                                                                                                                                                | PTPRG                                    | -2.012  | 0.00106 | 0.00846 |
| protein tyrosine phosphatase, receptor type, O                                                                                                                                                                | PTPRO                                    | -1.812  | 0.01460 | 0.04472 |
| protein tyrosine phosphatase, receptor-type, Z polypeptide 1                                                                                                                                                  | PTPRZ1                                   | -2.560  | 0.00468 | 0.02176 |
| protein tyrosine phosphatase-like (proline instead of catalytic arginine), member A                                                                                                                           | PTPLA                                    | -6.465  | 0.00007 | 0.00162 |
| protein tyrosine phosphatase-like A domain containing 1                                                                                                                                                       | PTPLAD1                                  | 1.694   | 0.00807 | 0.03068 |
| Protein-L-isoaspartate (D-aspartate) O-methyltransferase domain containing 1                                                                                                                                  | PCMTD1                                   | -1.606  | 0.00676 | 0.02743 |
| protocadherin 12                                                                                                                                                                                              | PCDH12                                   | 1.731   | 0.01270 | 0.04072 |
| protocadherin 20                                                                                                                                                                                              | PCDH20                                   | -14.268 | 0.04910 | 0.09742 |
| protocadherin 7                                                                                                                                                                                               | PCDH7                                    | -62.480 | 0.00640 | 0.02649 |
| protocadherin alpha 1 /// protocadherin alpha 10 /// protocadherin alpha 11 /// protocadherin alpha 12 /// protocadherin alpha 13 /// protocadherin alpha 2 /// protocadherin alpha 3 /// protocadherin alpha | PCDHA1 ///<br>PCDHA10 ///<br>PCDHA11 /// | 2.514   | 0.00062 | 0.00609 |

|                                                                                                                                                                                                                   |                                                                                                                                                                      |         |         |         |
|-------------------------------------------------------------------------------------------------------------------------------------------------------------------------------------------------------------------|----------------------------------------------------------------------------------------------------------------------------------------------------------------------|---------|---------|---------|
| 4 /// protocadherin alpha 5 /// protocadherin alpha 6 /// protocadherin alpha 7 /// protocadherin alpha 8 /// protocadherin alpha 9 /// protocadherin alpha subfamily C, 1 /// protocadherin alpha subfamily C, 2 | PCDHA12 ///<br>PCDHA13 ///<br>PCDHA2 ///<br>PCDHA3 ///<br>PCDHA4 ///<br>PCDHA5 ///<br>PCDHA6 ///<br>PCDHA7 ///<br>PCDHA8 ///<br>PCDHA9 ///<br>PCDHAC1 ///<br>PCDHAC2 |         |         |         |
| protocadherin alpha 2                                                                                                                                                                                             | PCDHA2                                                                                                                                                               | 2.410   | 0.00014 | 0.00238 |
| protocadherin beta 10                                                                                                                                                                                             | PCDHB10                                                                                                                                                              | 1.521   | 0.02220 | 0.05890 |
| protocadherin beta 13                                                                                                                                                                                             | PCDHB13                                                                                                                                                              | 2.529   | 0.00100 | 0.00814 |
| protocadherin beta 14                                                                                                                                                                                             | PCDHB14                                                                                                                                                              | 1.595   | 0.00688 | 0.02771 |
| protocadherin beta 16                                                                                                                                                                                             | PCDHB16                                                                                                                                                              | 1.671   | 0.00165 | 0.01120 |
| protocadherin beta 2                                                                                                                                                                                              | PCDHB2                                                                                                                                                               | 2.024   | 0.00266 | 0.01503 |
| protocadherin beta 3                                                                                                                                                                                              | PCDHB3                                                                                                                                                               | 1.796   | 0.00503 | 0.02278 |
| protocadherin beta 6                                                                                                                                                                                              | PCDHB6                                                                                                                                                               | 2.575   | 0.00348 | 0.01797 |
| protocadherin beta 7                                                                                                                                                                                              | PCDHB7                                                                                                                                                               | 1.811   | 0.00667 | 0.02720 |
| PRP4 pre-mRNA processing factor 4 homolog B (yeast)                                                                                                                                                               | PRPF4B                                                                                                                                                               | -1.639  | 0.04540 | 0.09263 |
| prune homolog 2 (Drosophila)                                                                                                                                                                                      | PRUNE2                                                                                                                                                               | 1.670   | 0.01440 | 0.04432 |
| PTC7 protein phosphatase homolog (S. cerevisiae)                                                                                                                                                                  | PPTC7                                                                                                                                                                | -2.145  | 0.00030 | 0.00381 |
| PTK7 protein tyrosine kinase 7                                                                                                                                                                                    | PTK7                                                                                                                                                                 | 1.833   | 0.00000 | 0.00011 |
| PTPRF interacting protein, binding protein 1 (liprin beta 1)                                                                                                                                                      | PPFIBP1                                                                                                                                                              | 1.638   | 0.02990 | 0.07135 |
| purinergic receptor P2X, ligand-gated ion channel, 1                                                                                                                                                              | P2RX1                                                                                                                                                                | -22.243 | 0.04450 | 0.09147 |
| purinergic receptor P2X, ligand-gated ion channel, 4                                                                                                                                                              | P2RX4                                                                                                                                                                | 1.597   | 0.00630 | 0.02624 |
| purinergic receptor P2X, ligand-gated ion channel, 7                                                                                                                                                              | P2RX7                                                                                                                                                                | 1.540   | 0.00041 | 0.00468 |
| purine-rich element binding protein B                                                                                                                                                                             | PURB                                                                                                                                                                 | -1.750  | 0.02840 | 0.06897 |
| purine-rich element binding protein G                                                                                                                                                                             | PURG                                                                                                                                                                 | 1.522   | 0.01620 | 0.04786 |
| putative homeodomain transcription factor 1                                                                                                                                                                       | PHTF1                                                                                                                                                                | 1.585   | 0.00000 | 0.00024 |
| PYD and CARD domain containing                                                                                                                                                                                    | PYCARD                                                                                                                                                               | 2.717   | 0.00023 | 0.00326 |
| pyridoxal (pyridoxine, vitamin B6) phosphatase                                                                                                                                                                    | PDXP                                                                                                                                                                 | 1.658   | 0.00209 | 0.01304 |
| pyroglutamyl-peptidase I                                                                                                                                                                                          | PGPEP1                                                                                                                                                               | 1.743   | 0.00000 | 0.00019 |
| pyrroline-5-carboxylate reductase 1                                                                                                                                                                               | PYCR1                                                                                                                                                                | 1.622   | 0.00023 | 0.00327 |
| pyruvate dehydrogenase (lipoamide) alpha 1                                                                                                                                                                        | PDHA1                                                                                                                                                                | -2.172  | 0.01890 | 0.05309 |
| pyruvate dehydrogenase complex, component X                                                                                                                                                                       | PDHX                                                                                                                                                                 | -1.923  | 0.01990 | 0.05490 |
| pyruvate dehydrogenase kinase, isozyme 4                                                                                                                                                                          | PDK4                                                                                                                                                                 | -64.621 | 0.00000 | 0.00002 |
| pyruvate kinase, muscle                                                                                                                                                                                           | PKM2                                                                                                                                                                 | 1.587   | 0.01040 | 0.03593 |
| RAB GTPase activating protein 1                                                                                                                                                                                   | RABGAP1                                                                                                                                                              | -1.534  | 0.00327 | 0.01722 |
| RAB GTPase activating protein 1-like                                                                                                                                                                              | RABGAP1L                                                                                                                                                             | 4.595   | 0.00289 | 0.01582 |
| RAB, member of RAS oncogene family-like 4                                                                                                                                                                         | RABL4                                                                                                                                                                | 2.521   | 0.00001 | 0.00051 |
| RAB, member RAS oncogene family-like 5                                                                                                                                                                            | RABL5                                                                                                                                                                | 1.714   | 0.00076 | 0.00684 |
| RAB11 family interacting protein 1 (class I)                                                                                                                                                                      | RAB11FIP1                                                                                                                                                            | -1.612  | 0.01050 | 0.03614 |
| RAB11 family interacting protein 5 (class I)                                                                                                                                                                      | RAB11FIP5                                                                                                                                                            | 1.535   | 0.00006 | 0.00142 |
| RAB20, member RAS oncogene family                                                                                                                                                                                 | RAB20                                                                                                                                                                | -1.787  | 0.02130 | 0.05732 |
| RAB21, member RAS oncogene family                                                                                                                                                                                 | RAB21                                                                                                                                                                | -1.728  | 0.00196 | 0.01256 |
| RAB27A, member RAS oncogene family                                                                                                                                                                                | RAB27A                                                                                                                                                               | -2.073  | 0.04550 | 0.09277 |
| RAB30, member RAS oncogene family                                                                                                                                                                                 | RAB30                                                                                                                                                                | 2.102   | 0.00000 | 0.00006 |
| RAB37, member RAS oncogene family                                                                                                                                                                                 | RAB37                                                                                                                                                                | 1.854   | 0.00430 | 0.02058 |
| RAB42, member RAS oncogene family                                                                                                                                                                                 | RAB42                                                                                                                                                                | 2.235   | 0.00000 | 0.00004 |
| RAB4A, member RAS oncogene family                                                                                                                                                                                 | RAB4A                                                                                                                                                                | -1.883  | 0.00169 | 0.01137 |
| RAB4A, member RAS oncogene family /// S-phase response (cyclin related)                                                                                                                                           | RAB4A /// SPHAR                                                                                                                                                      | -1.661  | 0.00865 | 0.03207 |

|                                                             |          |         |         |         |
|-------------------------------------------------------------|----------|---------|---------|---------|
| RAB6B, member RAS oncogene family                           | RAB6B    | 2.677   | 0.00002 | 0.00074 |
| RAB7, member RAS oncogene family-like 1                     | RAB7L1   | 1.702   | 0.00700 | 0.02806 |
| RAB7B, member RAS oncogene family                           | RAB7B    | 6.416   | 0.00000 | 0.00027 |
| RAB8B, member RAS oncogene family                           | RAB8B    | -2.573  | 0.01050 | 0.03614 |
| rabphilin 3A-like (without C2 domains)                      | RPH3AL   | 1.678   | 0.01160 | 0.03843 |
| Rac/Cdc42 guanine nucleotide exchange factor (GEF) 6        | ARHGEF6  | 1.503   | 0.00003 | 0.00090 |
| RAD54 homolog B ( <i>S. cerevisiae</i> )                    | RAD54B   | 1.524   | 0.00115 | 0.00894 |
| radical S-adenosyl methionine domain containing 2           | RSAD2    | 1.522   | 0.04960 | 0.09797 |
| Ral GEF with PH domain and SH3 binding motif 1              | RALGPS1  | 1.709   | 0.00105 | 0.00840 |
| RALBP1 associated Eps domain containing 1                   | REPS1    | -1.686  | 0.01620 | 0.04786 |
| Rap guanine nucleotide exchange factor (GEF) 3              | RAPGEF3  | -1.511  | 0.03820 | 0.08346 |
| Rap guanine nucleotide exchange factor (GEF) 6              | RAPGEF6  | -1.513  | 0.00914 | 0.03316 |
| RAP1A, member of RAS oncogene family                        | RAP1A    | -1.848  | 0.00674 | 0.02739 |
| RAP2A, member of RAS oncogene family                        | RAP2A    | -1.974  | 0.00026 | 0.00354 |
| RAP2B, member of RAS oncogene family                        | RAP2B    | 1.921   | 0.00538 | 0.02379 |
| RAS and EF-hand domain containing                           | RASEF    | 1.649   | 0.00590 | 0.02518 |
| Ras and Rab interactor 2                                    | RIN2     | 1.785   | 0.00000 | 0.00031 |
| Ras association (RalGDS/AF-6) domain family member 2        | RASSF2   | -2.112  | 0.03750 | 0.08248 |
| RAS guanyl releasing protein 2 (calcium and DAG-regulated)  | RASGRP2  | -8.054  | 0.00762 | 0.02957 |
| Ras homolog enriched in brain                               | RHEB     | -1.511  | 0.00129 | 0.00958 |
| ras homolog gene family, member B                           | RHOB     | -2.614  | 0.00006 | 0.00138 |
| ras homolog gene family, member J                           | RHOJ     | 2.652   | 0.00182 | 0.01192 |
| ras homolog gene family, member Q                           | RHOQ     | -1.913  | 0.00846 | 0.03158 |
| ras homolog gene family, member U                           | RHOU     | -3.607  | 0.02900 | 0.06994 |
| Ras interacting protein 1                                   | RASIP1   | -2.561  | 0.02610 | 0.06538 |
| RAS p21 protein activator 3                                 | RASA3    | 1.784   | 0.00001 | 0.00040 |
| RAS protein activator like 2                                | RASAL2   | -2.309  | 0.01670 | 0.04885 |
| RAS, dexamethasone-induced 1                                | RASD1    | -5.696  | 0.00046 | 0.00507 |
| RasGEF domain family, member 1A                             | RASGEF1A | 4.437   | 0.00044 | 0.00487 |
| RAS-like, estrogen-regulated, growth inhibitor              | RERG     | 2.229   | 0.00027 | 0.00362 |
| RAS-like, family 11, member A                               | RASL11A  | -4.274  | 0.00869 | 0.03218 |
| Ras-related associated with diabetes                        | RRAD     | -10.651 | 0.01140 | 0.03802 |
| RCAN family member 3                                        | RCAN3    | 3.042   | 0.00000 | 0.00031 |
| RCS domain containing 1                                     | RCS1     | -4.486  | 0.00003 | 0.00086 |
| receptor (chemosensory) transporter protein 4               | RTP4     | 2.932   | 0.00002 | 0.00071 |
| receptor (G protein-coupled) activity modifying protein 1   | RAMP1    | -7.635  | 0.00136 | 0.00990 |
| receptor accessory protein 1                                | REEP1    | -50.153 | 0.00694 | 0.02790 |
| receptor-interacting serine-threonine kinase 2              | RIPK2    | 1.695   | 0.00118 | 0.00907 |
| regulator of calcineurin 2                                  | RCAN2    | -4.404  | 0.01170 | 0.03865 |
| regulator of G-protein signaling 1                          | RGS1     | -54.211 | 0.00000 | 0.00009 |
| regulator of G-protein signaling 10                         | RGS10    | 1.583   | 0.00752 | 0.02934 |
| regulator of G-protein signaling 12                         | RGS12    | 1.566   | 0.00117 | 0.00904 |
| regulator of G-protein signaling 19                         | RGS19    | -2.044  | 0.02740 | 0.06734 |
| regulator of G-protein signaling 2, 24kDa                   | RGS2     | -2.680  | 0.00033 | 0.00405 |
| regulator of G-protein signaling 3                          | RGS3     | 2.115   | 0.00069 | 0.00648 |
| regulator of G-protein signaling 5                          | RGS5     | -5.364  | 0.02240 | 0.05919 |
| regulator of G-protein signaling 7 binding protein          | RGS7BP   | -6.331  | 0.00573 | 0.02477 |
| regulatory factor X, 5 (influences HLA class II expression) | RFX5     | 1.530   | 0.00277 | 0.01539 |
| regulatory factor X, 7                                      | RFX7     | 1.648   | 0.00015 | 0.00248 |
| related RAS viral (r-ras) oncogene homolog 2                | RRAS2    | -2.228  | 0.00576 | 0.02481 |
| replication protein A4, 34kDa                               | RPA4     | -1.554  | 0.00274 | 0.01530 |



|                                                            |          |        |         |         |
|------------------------------------------------------------|----------|--------|---------|---------|
| reticulocalbin 3, EF-hand calcium binding domain           | RCN3     | 1.656  | 0.00013 | 0.00233 |
| retinitis pigmentosa GTPase regulator                      | RPGR     | -2.269 | 0.00121 | 0.00921 |
| retinoblastoma binding protein 6                           | RBBP6    | -3.528 | 0.00016 | 0.00261 |
| retinoic acid receptor responder (tazarotene induced) 2    | RARRES2  | -2.108 | 0.00776 | 0.02990 |
| retinol binding protein 7, cellular                        | RBP7     | -8.763 | 0.00182 | 0.01192 |
| retinol dehydrogenase 13 (all-trans/9-cis)                 | RDH13    | 1.618  | 0.02730 | 0.06721 |
| reversion-inducing-cysteine-rich protein with kazal motifs | RECK     | 1.687  | 0.00047 | 0.00507 |
| RGM domain family, member A                                | RGMA     | 1.609  | 0.00234 | 0.01390 |
| Rho family GTPase 2                                        | RND2     | 1.615  | 0.00025 | 0.00338 |
| Rho family GTPase 3                                        | RND3     | -1.941 | 0.00049 | 0.00524 |
| Rho GTPase activating protein 10                           | ARHGAP10 | -3.504 | 0.00000 | 0.00013 |
| Rho GTPase activating protein 12                           | ARHGAP12 | 1.611  | 0.00008 | 0.00174 |
| Rho GTPase activating protein 15                           | ARHGAP15 | -6.757 | 0.00457 | 0.02143 |
| Rho GTPase activating protein 21                           | ARHGAP21 | 1.588  | 0.00003 | 0.00089 |
| Rho GTPase activating protein 22                           | ARHGAP22 | 3.138  | 0.00015 | 0.00244 |
| Rho GTPase activating protein 24                           | ARHGAP24 | -1.973 | 0.04920 | 0.09753 |
| Rho GTPase activating protein 26                           | ARHGAP26 | -5.183 | 0.00013 | 0.00233 |
| Rho GTPase activating protein 28                           | ARHGAP28 | 3.382  | 0.00335 | 0.01752 |
| Rho GTPase-activating protein                              | RICS     | 2.110  | 0.00229 | 0.01371 |
| Rho guanine nucleotide exchange factor (GEF) 10            | ARHGEF10 | 1.666  | 0.00326 | 0.01718 |
| Rho guanine nucleotide exchange factor (GEF) 12            | ARHGEF12 | 1.676  | 0.00039 | 0.00459 |
| Rho guanine nucleotide exchange factor (GEF) 3             | ARHGEF3  | 2.180  | 0.00000 | 0.00020 |
| Rho guanine nucleotide exchange factor (GEF) 4             | ARHGEF4  | 1.737  | 0.00054 | 0.00558 |
| Rho guanine nucleotide exchange factor (GEF) 7             | ARHGEF7  | -1.616 | 0.00298 | 0.01617 |
| Rho-associated, coiled-coil containing protein kinase 1    | ROCK1    | -1.903 | 0.00042 | 0.00475 |
| rhopilin, Rho GTPase binding protein 2                     | RHPN2    | 1.614  | 0.00980 | 0.03461 |
| Rho-related BTB domain containing 3                        | RHOBTB3  | -1.925 | 0.00582 | 0.02498 |
| rhotekin                                                   | RTKN     | 1.877  | 0.00249 | 0.01444 |
| ribonuclease H2, subunit A                                 | RNASEH2A | 1.619  | 0.00079 | 0.00703 |
| ribonuclease L (2',5'-oligoadenylate synthetase-dependent) | RNASEL   | 1.522  | 0.00015 | 0.00249 |
| ribosomal L24 domain containing 1                          | RSL24D1  | -1.573 | 0.00002 | 0.00061 |
| ribosomal modification protein rimK-like family member B   | RIMKLB   | -3.179 | 0.01350 | 0.04247 |
| ribosomal protein L13                                      | RPL13    | -1.595 | 0.02200 | 0.05858 |
| ribosomal protein L13 pseudogene 5                         | RPL13P5  | 1.613  | 0.01520 | 0.04600 |
| ribosomal protein L14                                      | RPL14    | -1.725 | 0.00201 | 0.01276 |
| Ribosomal protein L15                                      | RPL15    | -1.789 | 0.01250 | 0.04030 |
| ribosomal protein L24                                      | RPL24    | -1.519 | 0.00005 | 0.00129 |
| ribosomal protein L31                                      | RPL31    | -1.874 | 0.00000 | 0.00031 |
| ribosomal protein L36                                      | RPL36    | -1.511 | 0.00001 | 0.00048 |
| ribosomal protein L36a                                     | RPL36A   | -1.513 | 0.00017 | 0.00275 |
| Ribosomal protein L37                                      | RPL37    | -1.880 | 0.00077 | 0.00692 |
| ribosomal protein L5                                       | RPL5     | -1.574 | 0.00000 | 0.00003 |
| Ribosomal protein S15a                                     | RPS15A   | -1.666 | 0.00822 | 0.03106 |
| ribosomal protein S16                                      | RPS16    | -1.517 | 0.00000 | 0.00018 |
| ribosomal protein S16 pseudogene 5                         | RPS16P5  | -2.934 | 0.00258 | 0.01474 |
| ribosomal protein S23                                      | RPS23    | -1.921 | 0.00702 | 0.02809 |
| ribosomal protein S6 kinase, 90kDa, polypeptide 2          | RPS6KA2  | -2.061 | 0.00009 | 0.00187 |
| ribosome binding protein 1 homolog 180kDa (dog)            | RRBP1    | 1.846  | 0.00076 | 0.00686 |
| ring finger and CHY zinc finger domain containing 1        | RCHY1    | -1.552 | 0.00309 | 0.01657 |
| ring finger protein 115                                    | RNF115   | -2.960 | 0.00018 | 0.00279 |
| ring finger protein 141                                    | RNF141   | -1.668 | 0.00078 | 0.00695 |

|                                                                                                                      |                   |         |         |         |
|----------------------------------------------------------------------------------------------------------------------|-------------------|---------|---------|---------|
| ring finger protein 144B                                                                                             | RNF144B           | -4.355  | 0.00000 | 0.00018 |
| ring finger protein 160                                                                                              | RNF160            | -1.524  | 0.01210 | 0.03950 |
| ring finger protein 19A                                                                                              | RNF19A            | -1.867  | 0.00331 | 0.01734 |
| ring finger protein 19B                                                                                              | RNF19B            | 1.601   | 0.00419 | 0.02022 |
| ring finger protein 217                                                                                              | RNF217            | -1.997  | 0.00004 | 0.00107 |
| ring finger protein, transmembrane 2                                                                                 | RNFT2             | 1.804   | 0.00505 | 0.02282 |
| RIO kinase 3 (yeast)                                                                                                 | RIOK3             | -1.771  | 0.02560 | 0.06458 |
| RNA binding motif protein 12B                                                                                        | RBM12B            | 1.553   | 0.00462 | 0.02157 |
| RNA binding motif protein 15                                                                                         | RBM15             | 1.709   | 0.01160 | 0.03843 |
| RNA binding motif protein 43                                                                                         | RBM43             | 2.179   | 0.00196 | 0.01256 |
| RNA binding motif protein 4B                                                                                         | RBM4B             | 1.789   | 0.00012 | 0.00221 |
| RNA binding protein with multiple splicing                                                                           | RBPMS             | -2.680  | 0.00017 | 0.00274 |
| RNA binding protein with multiple splicing /// succinate dehydrogenase complex, subunit A, flavoprotein pseudogene 2 | RBPMS /// SDHALP2 | -4.830  | 0.01890 | 0.05309 |
| RNA terminal phosphate cyclase-like 1                                                                                | RCL1              | -2.034  | 0.00550 | 0.02412 |
| roundabout, axon guidance receptor, homolog 1 (Drosophila)                                                           | ROBO1             | 1.998   | 0.00018 | 0.00285 |
| RPGRIP1-like                                                                                                         | RPGRIP1L          | 1.681   | 0.01510 | 0.04579 |
| RPTOR independent companion of MTOR, complex 2                                                                       | RICTOR            | -2.003  | 0.00633 | 0.02630 |
| RRS1 ribosome biogenesis regulator homolog (S. cerevisiae)                                                           | RRS1              | -1.568  | 0.00028 | 0.00363 |
| R-spondin 2 homolog (Xenopus laevis)                                                                                 | RSPO2             | 12.759  | 0.00000 | 0.00002 |
| RUN and SH3 domain containing 1                                                                                      | RUSC1             | 1.744   | 0.00034 | 0.00418 |
| runt-related transcription factor 1                                                                                  | RUNX1             | 2.403   | 0.00020 | 0.00297 |
| runt-related transcription factor 2                                                                                  | RUNX2             | 2.428   | 0.00332 | 0.01738 |
| RWD domain containing 2A                                                                                             | RWDD2A            | 1.656   | 0.00007 | 0.00161 |
| ryanodine receptor 2 (cardiac)                                                                                       | RYR2              | -36.703 | 0.01850 | 0.05236 |
| S100 calcium binding protein A10                                                                                     | S100A10           | 1.778   | 0.00002 | 0.00063 |
| S100 calcium binding protein A4                                                                                      | S100A4            | 1.821   | 0.00082 | 0.00720 |
| S100 calcium binding protein A8                                                                                      | S100A8            | -12.524 | 0.01760 | 0.05063 |
| S100 calcium binding protein B                                                                                       | S100B             | 1.768   | 0.01900 | 0.05324 |
| SAC3 domain containing 1                                                                                             | SAC3D1            | 1.816   | 0.00000 | 0.00013 |
| sal-like 1 (Drosophila)                                                                                              | SALL1             | 1.826   | 0.03160 | 0.07408 |
| sal-like 2 (Drosophila)                                                                                              | SALL2             | 1.790   | 0.00272 | 0.01523 |
| sal-like 3 (Drosophila)                                                                                              | SALL3             | 1.977   | 0.01160 | 0.03843 |
| salt-inducible kinase 1                                                                                              | SIK1              | -77.212 | 0.00000 | 0.00020 |
| SAM domain and HD domain 1                                                                                           | SAMHD1            | -9.781  | 0.00047 | 0.00509 |
| SAP domain containing ribonucleoprotein                                                                              | SARNP             | -2.138  | 0.00023 | 0.00328 |
| sarcolemma associated protein                                                                                        | SLMAP             | -14.760 | 0.04200 | 0.08841 |
| SATB homeobox 2                                                                                                      | SATB2             | 2.786   | 0.00001 | 0.00059 |
| scavenger receptor class A, member 3                                                                                 | SCARA3            | 4.584   | 0.00001 | 0.00046 |
| scavenger receptor class A, member 5 (putative)                                                                      | SCARA5            | 1.935   | 0.01200 | 0.03929 |
| scavenger receptor class B, member 1                                                                                 | SCARB1            | 2.177   | 0.00000 | 0.00003 |
| schlafen family member 11                                                                                            | SLFN11            | 2.444   | 0.00004 | 0.00112 |
| schlafen family member 12                                                                                            | SLFN12            | 1.703   | 0.00073 | 0.00667 |
| schlafen family member 13                                                                                            | SLFN13            | 1.789   | 0.00910 | 0.03310 |
| Scm-like with four mbt domains 2                                                                                     | SFMBT2            | -1.782  | 0.03100 | 0.07314 |
| SCO cytochrome oxidase deficient homolog 2 (yeast)                                                                   | SCO2              | 1.834   | 0.00011 | 0.00206 |
| SEC16 homolog B (S. cerevisiae)                                                                                      | SEC16B            | 2.451   | 0.00001 | 0.00046 |
| SEC24 family, member D (S. cerevisiae)                                                                               | SEC24D            | 1.794   | 0.00580 | 0.02491 |
| secretagoin, EF-hand calcium binding protein                                                                         | SCGN              | -7.862  | 0.00893 | 0.03275 |
| secreted frizzled-related protein 2                                                                                  | SFRP2             | 2.978   | 0.00082 | 0.00719 |
| secreted protein, acidic, cysteine-rich (osteonectin)                                                                | SPARC             | 1.658   | 0.00217 | 0.01334 |
| secretogranin II (chromogranin C)                                                                                    | SCG2              | 3.595   | 0.00017 | 0.00275 |

|                                                                                                                                             |          |        |         |         |
|---------------------------------------------------------------------------------------------------------------------------------------------|----------|--------|---------|---------|
| selectin L                                                                                                                                  | SELL     | 2.344  | 0.00443 | 0.02098 |
| selectin P (granule membrane protein 140kDa, antigen CD62)                                                                                  | SELP     | 2.789  | 0.00048 | 0.00520 |
| selenoprotein W, 1                                                                                                                          | SEPW1    | -1.796 | 0.04330 | 0.09004 |
| selenoprotein X, 1                                                                                                                          | SEPX1    | -2.555 | 0.00053 | 0.00553 |
| sema domain, immunoglobulin domain (Ig), short basic domain, secreted, (semaphorin) 3A                                                      | SEMA3A   | 1.707  | 0.03400 | 0.07748 |
| sema domain, immunoglobulin domain (Ig), short basic domain, secreted, (semaphorin) 3B                                                      | SEMA3B   | 1.947  | 0.00029 | 0.00375 |
| sema domain, immunoglobulin domain (Ig), short basic domain, secreted, (semaphorin) 3C                                                      | SEMA3C   | 2.471  | 0.00388 | 0.01926 |
| sema domain, immunoglobulin domain (Ig), short basic domain, secreted, (semaphorin) 3F                                                      | SEMA3F   | -4.126 | 0.00592 | 0.02522 |
| sema domain, immunoglobulin domain (Ig), transmembrane domain (TM) and short cytoplasmic domain, (semaphorin) 4F                            | SEMA4F   | 2.040  | 0.00000 | 0.00010 |
| sema domain, seven thrombospondin repeats (type 1 and type 1-like), transmembrane domain (TM) and short cytoplasmic domain, (semaphorin) 5A | SEMA5A   | -2.384 | 0.00226 | 0.01362 |
| sema domain, transmembrane domain (TM), and cytoplasmic domain, (semaphorin) 6D                                                             | SEMA6D   | 1.625  | 0.01840 | 0.05217 |
| Septin 11                                                                                                                                   | 11-Sep   | -2.443 | 0.00494 | 0.02255 |
| septin 13                                                                                                                                   | 13-Sep   | -1.830 | 0.03090 | 0.07295 |
| septin 6                                                                                                                                    | 6-Sep    | 2.059  | 0.00014 | 0.00239 |
| septin 8                                                                                                                                    | 8-Sep    | 2.142  | 0.00000 | 0.00009 |
| serglycin                                                                                                                                   | SRGN     | -4.830 | 0.00002 | 0.00083 |
| serine active site containing 1                                                                                                             | SERAC1   | 1.771  | 0.00206 | 0.01294 |
| serine hydroxymethyltransferase 2 (mitochondrial)                                                                                           | SHMT2    | 1.793  | 0.01180 | 0.03884 |
| Serine palmitoyltransferase, long chain base subunit 2                                                                                      | SPTLC2   | 1.514  | 0.01450 | 0.04451 |
| serine palmitoyltransferase, long chain base subunit 3                                                                                      | SPTLC3   | 1.705  | 0.00000 | 0.00027 |
| serine peptidase inhibitor, Kazal type 5                                                                                                    | SPINK5   | 1.802  | 0.01070 | 0.03655 |
| serine peptidase inhibitor, Kunitz type, 2                                                                                                  | SPINT2   | -6.371 | 0.00196 | 0.01256 |
| serine racemase                                                                                                                             | SRR      | 1.615  | 0.04910 | 0.09742 |
| serine/threonine kinase 17a                                                                                                                 | STK17A   | 1.741  | 0.00169 | 0.01137 |
| serine/threonine kinase 17b                                                                                                                 | STK17B   | -3.616 | 0.00645 | 0.02663 |
| serine/threonine kinase 24 (STE20 homolog, yeast)                                                                                           | STK24    | -1.638 | 0.04960 | 0.09797 |
| serine/threonine-protein kinase NIM1                                                                                                        | MGC42105 | 1.741  | 0.00008 | 0.00170 |
| serpin peptidase inhibitor, clade B (ovalbumin), member 9                                                                                   | SERPINB9 | -4.978 | 0.00931 | 0.03355 |
| serpin peptidase inhibitor, clade E (nexin, plasminogen activator inhibitor type 1), member 2                                               | SERPINE2 | 2.149  | 0.00005 | 0.00127 |
| serpin peptidase inhibitor, clade H (heat shock protein 47), member 1, (collagen binding protein 1)                                         | SERPINH1 | 1.941  | 0.00096 | 0.00797 |
| SERTA domain containing 4                                                                                                                   | SERTAD4  | 7.670  | 0.00000 | 0.00002 |
| serum response factor (c-fos serum response element-binding transcription factor)                                                           | SRF      | -2.275 | 0.00485 | 0.02232 |
| serum/glucocorticoid regulated kinase 1                                                                                                     | SGK1     | -4.519 | 0.00042 | 0.00472 |
| sestrin 1                                                                                                                                   | SESN1    | -2.026 | 0.00344 | 0.01782 |
| SET domain and mariner transposase fusion gene                                                                                              | SETMAR   | -1.760 | 0.00022 | 0.00317 |
| SET domain containing 4                                                                                                                     | SETD4    | 1.837  | 0.00147 | 0.01042 |
| seven in absentia homolog 2 (Drosophila)                                                                                                    | SIAH2    | -1.543 | 0.01700 | 0.04945 |
| sex comb on midleg-like 1 (Drosophila)                                                                                                      | SCML1    | -2.228 | 0.02950 | 0.07069 |
| SFRS protein kinase 2                                                                                                                       | SRPK2    | 1.501  | 0.00199 | 0.01267 |
| SH2 domain containing 4A                                                                                                                    | SH2D4A   | 1.592  | 0.00023 | 0.00327 |
| SH3 domain containing ring finger 3                                                                                                         | SH3RF3   | -1.758 | 0.00003 | 0.00096 |
| SH3-domain binding protein 5 (BTK-associated)                                                                                               | SH3BP5   | -2.345 | 0.00025 | 0.00340 |
| SH3-domain GRB2-like (endophilin) interacting protein 1                                                                                     | SGIP1    | 1.712  | 0.01040 | 0.03593 |
| SH3-domain kinase binding protein 1                                                                                                         | SH3KBP1  | 2.038  | 0.00082 | 0.00719 |
| short coiled-coil protein                                                                                                                   | SCOC     | -1.677 | 0.02280 | 0.05992 |

|                                                                                                                         |                                         |         |         |         |
|-------------------------------------------------------------------------------------------------------------------------|-----------------------------------------|---------|---------|---------|
| short stature homeobox 2                                                                                                | SHOX2                                   | -4.655  | 0.01670 | 0.04885 |
| shroom family member 1                                                                                                  | SHROOM1                                 | 1.720   | 0.00219 | 0.01340 |
| shroom family member 4                                                                                                  | SHROOM4                                 | 1.846   | 0.00055 | 0.00567 |
| Shwachman-Bodian-Diamond syndrome /// Shwachman-Bodian-Diamond syndrome pseudogene                                      | SBDS /// SBDSP                          | -1.636  | 0.00012 | 0.00226 |
| sialic acid binding Ig-like lectin 10 /// sialic acid binding Ig-like lectin 12                                         | SIGLEC10 /// SIGLEC12                   | -2.067  | 0.00727 | 0.02876 |
| sidekick homolog 2 (chicken)                                                                                            | SDK2                                    | 2.117   | 0.00001 | 0.00038 |
| sideroflexin 1                                                                                                          | SFXN1                                   | 1.767   | 0.00267 | 0.01507 |
| sideroflexin 2                                                                                                          | SFXN2                                   | -1.546  | 0.00280 | 0.01553 |
| sideroflexin 3                                                                                                          | SFXN3                                   | 1.740   | 0.00002 | 0.00067 |
| signal peptide, CUB domain, EGF-like 2                                                                                  | SCUBE2                                  | 1.656   | 0.00419 | 0.02022 |
| signal peptide, CUB domain, EGF-like 3                                                                                  | SCUBE3                                  | -8.588  | 0.04540 | 0.09263 |
| signal-regulatory protein alpha                                                                                         | SIRPA                                   | 2.025   | 0.00009 | 0.00185 |
| similar to DTW domain containing 2                                                                                      | LOC729839                               | 1.963   | 0.00011 | 0.00205 |
| similar to erlectin                                                                                                     | LOC100292863                            | 2.185   | 0.00238 | 0.01407 |
| Similar to FRAS1 related extracellular matrix protein 2                                                                 | LOC650794                               | 2.459   | 0.00894 | 0.03275 |
| similar to hCG1744891                                                                                                   | LOC100289026                            | 2.938   | 0.00687 | 0.02769 |
| similar to hCG1747809 /// SHC (Src homology 2 domain containing) transforming protein 2                                 | LOC100291393 /// SHC2                   | 1.653   | 0.00895 | 0.03278 |
| similar to hCG1811002                                                                                                   | LOC100134361                            | 2.077   | 0.00012 | 0.00215 |
| similar to hCG2006445                                                                                                   | LOC100287032                            | -1.770  | 0.01440 | 0.04432 |
| Similar to hCG2030186                                                                                                   | LOC729070                               | -15.289 | 0.03130 | 0.07364 |
| similar to HSPC047 protein /// similar to HSPC047 protein /// RAS p21 protein activator 4                               | LOC100286937 /// LOC100287164 /// RASA4 | 1.852   | 0.00834 | 0.03134 |
| similar to hypothetical protein 9630041N07                                                                              | DKFZp686E2433                           | 1.553   | 0.00089 | 0.00758 |
| Similar to LOC166075                                                                                                    | LOC401097                               | 4.821   | 0.00074 | 0.00672 |
| similar to NADH dehydrogenase subunit 2                                                                                 | LOC100131754                            | -1.617  | 0.01880 | 0.05288 |
| similar to olfactory receptor, family 7, subfamily A, member 17                                                         | LOC441453                               | 1.512   | 0.00050 | 0.00532 |
| similar to PTPRF interacting protein binding protein 1 /// PTPRF interacting protein, binding protein 1 (liprin beta 1) | LOC729222 /// PPFIBP1                   | 1.821   | 0.01840 | 0.05217 |
| similar to R28379_1                                                                                                     | LOC390940                               | 1.521   | 0.00001 | 0.00047 |
| similar to ribosomal protein S21 /// ribosomal protein S21                                                              | LOC100291837 /// RPS21                  | -1.505  | 0.00014 | 0.00243 |
| sine oculis binding protein homolog (Drosophila)                                                                        | SOBP                                    | 1.505   | 0.00828 | 0.03117 |
| SIX homeobox 4                                                                                                          | SIX4                                    | 1.547   | 0.02230 | 0.05907 |
| six transmembrane epithelial antigen of the prostate 1                                                                  | STEAP1                                  | 2.710   | 0.00299 | 0.01621 |
| SLAIN motif family, member 1                                                                                            | SLAIN1                                  | 1.504   | 0.02090 | 0.05673 |
| SLC2A4 regulator                                                                                                        | SLC2A4RG                                | 1.604   | 0.00042 | 0.00474 |
| slingshot homolog 2 (Drosophila)                                                                                        | SSH2                                    | -2.084  | 0.03920 | 0.08480 |
| SLIT-ROBO Rho GTPase activating protein 1                                                                               | SRGAP1                                  | -1.657  | 0.03270 | 0.07574 |
| small ArfGAP2                                                                                                           | SMAP2                                   | -1.976  | 0.00014 | 0.00238 |
| small Cajal body-specific RNA 17                                                                                        | SCARNA17                                | -2.379  | 0.00113 | 0.00885 |
| small G protein signaling modulator 1                                                                                   | SGSM1                                   | 1.568   | 0.02370 | 0.06141 |
| small G protein signaling modulator 2                                                                                   | SGSM2                                   | 1.575   | 0.00612 | 0.02581 |
| small nucleolar RNA host gene 8 (non-protein coding)                                                                    | SNHG8                                   | -1.711  | 0.00373 | 0.01880 |
| small nucleolar RNA, C/D box 104                                                                                        | SNORD104                                | -1.569  | 0.03660 | 0.08124 |
| small VCP/p97-interacting protein                                                                                       | SVIP                                    | -1.727  | 0.00346 | 0.01790 |
| SMEK homolog 1, suppressor of mek1 (Dictyostelium)                                                                      | SMEK1                                   | -2.164  | 0.01270 | 0.04072 |
| SMEK homolog 2, suppressor of mek1 (Dictyostelium)                                                                      | SMEK2                                   | -1.690  | 0.00696 | 0.02797 |
| smoothelin                                                                                                              | SMTN                                    | -5.416  | 0.04450 | 0.09147 |
| sodium channel, voltage-gated, type I, beta                                                                             | SCN1B                                   | 1.522   | 0.00389 | 0.01928 |
| sodium channel, voltage-gated, type II, alpha subunit                                                                   | SCN2A                                   | 3.784   | 0.00342 | 0.01774 |

|                                                                                             |          |         |         |         |
|---------------------------------------------------------------------------------------------|----------|---------|---------|---------|
| sodium channel, voltage-gated, type III, alpha subunit                                      | SCN3A    | -8.784  | 0.02410 | 0.06209 |
| sodium channel, voltage-gated, type IV, beta                                                | SCN4B    | 1.832   | 0.00481 | 0.02219 |
| sodium channel, voltage-gated, type IX, alpha subunit                                       | SCN9A    | 1.737   | 0.00078 | 0.00698 |
| sodium channel, voltage-gated, type VII, alpha                                              | SCN7A    | -3.020  | 0.04090 | 0.08696 |
| sodium leak channel, non-selective                                                          | NALCN    | 2.785   | 0.00006 | 0.00144 |
| solute carrier family 1 (glial high affinity glutamate transporter), member 2               | SLC1A2   | 2.603   | 0.00001 | 0.00033 |
| solute carrier family 1 (glial high affinity glutamate transporter), member 3               | SLC1A3   | -6.085  | 0.00625 | 0.02609 |
| solute carrier family 1 (glutamate/neutral amino acid transporter), member 4                | SLC1A4   | 2.205   | 0.00002 | 0.00069 |
| solute carrier family 11 (proton-coupled divalent metal ion transporters), member 1         | SLC11A1  | -1.721  | 0.01040 | 0.03593 |
| solute carrier family 12 (potassium/chloride transporters), member 8                        | SLC12A8  | 1.874   | 0.00283 | 0.01563 |
| solute carrier family 16, member 2 (monocarboxylic acid transporter 8)                      | SLC16A2  | 1.574   | 0.00364 | 0.01852 |
| solute carrier family 16, member 9 (monocarboxylic acid transporter 9)                      | SLC16A9  | -2.153  | 0.01860 | 0.05251 |
| solute carrier family 17 (anion/sugar transporter), member 5                                | SLC17A5  | 1.814   | 0.00578 | 0.02488 |
| solute carrier family 19 (thiamine transporter), member 2                                   | SLC19A2  | -5.923  | 0.00001 | 0.00039 |
| solute carrier family 2 (facilitated glucose transporter), member 10                        | SLC2A10  | 2.117   | 0.00002 | 0.00084 |
| solute carrier family 2 (facilitated glucose transporter), member 6                         | SLC2A6   | 2.397   | 0.00000 | 0.00017 |
| solute carrier family 20 (phosphate transporter), member 1                                  | SLC20A1  | 1.508   | 0.00121 | 0.00921 |
| solute carrier family 22, member 23                                                         | SLC22A23 | 2.244   | 0.00566 | 0.02458 |
| solute carrier family 25 (mitochondrial carrier), member 18                                 | SLC25A18 | -1.717  | 0.00370 | 0.01870 |
| solute carrier family 25 (mitochondrial carrier; adenine nucleotide translocator), member 5 | SLC25A5  | -1.659  | 0.00288 | 0.01578 |
| solute carrier family 25 (mitochondrial carrier; phosphate carrier), member 25              | SLC25A25 | -1.832  | 0.00001 | 0.00039 |
| solute carrier family 25, member 29                                                         | SLC25A29 | -1.561  | 0.00328 | 0.01725 |
| solute carrier family 25, member 33                                                         | SLC25A33 | -2.377  | 0.00003 | 0.00092 |
| solute carrier family 25, member 45                                                         | SLC25A45 | 1.596   | 0.00066 | 0.00630 |
| solute carrier family 26 (sulfate transporter), member 2                                    | SLC26A2  | 1.653   | 0.00157 | 0.01086 |
| solute carrier family 3 (activators of dibasic and neutral amino acid transport), member 2  | SLC3A2   | -1.584  | 0.00490 | 0.02247 |
| solute carrier family 35, member B2                                                         | SLC35B2  | 1.775   | 0.00000 | 0.00029 |
| solute carrier family 35, member B4                                                         | SLC35B4  | 1.700   | 0.00231 | 0.01380 |
| solute carrier family 35, member E4                                                         | SLC35E4  | 1.547   | 0.00003 | 0.00099 |
| solute carrier family 35, member F1                                                         | SLC35F1  | -2.096  | 0.02550 | 0.06439 |
| solute carrier family 35, member F2                                                         | SLC35F2  | 2.065   | 0.00781 | 0.03002 |
| solute carrier family 36 (proton/amino acid symporter), member 4                            | SLC36A4  | -1.868  | 0.00893 | 0.03275 |
| solute carrier family 38, member 10                                                         | SLC38A10 | 1.633   | 0.00570 | 0.02468 |
| solute carrier family 38, member 2                                                          | SLC38A2  | -1.917  | 0.00019 | 0.00288 |
| solute carrier family 39 (zinc transporter), member 10                                      | SLC39A10 | 1.745   | 0.00100 | 0.00816 |
| solute carrier family 39 (zinc transporter), member 14                                      | SLC39A14 | -2.405  | 0.00022 | 0.00320 |
| solute carrier family 4, sodium bicarbonate cotransporter, member 4                         | SLC4A4   | 2.407   | 0.02700 | 0.06680 |
| Solute carrier family 4, sodium bicarbonate cotransporter, member 5                         | SLC4A5   | -1.557  | 0.01100 | 0.03720 |
| solute carrier family 46 (folate transporter), member 1                                     | SLC46A1  | 1.654   | 0.00087 | 0.00746 |
| solute carrier family 47, member 1                                                          | SLC47A1  | 1.784   | 0.01540 | 0.04633 |
| solute carrier family 6 (neurotransmitter transporter, serotonin), member 4                 | SLC6A4   | -5.117  | 0.01890 | 0.05309 |
| Solute carrier family 6, member 16                                                          | SLC6A16  | -1.971  | 0.03860 | 0.08403 |
| solute carrier family 7 (cationic amino acid transporter, y+ system), member 2              | SLC7A2   | -13.648 | 0.00298 | 0.01617 |
| solute carrier family 7 (cationic amino acid transporter, y+ system), member 7              | SLC7A7   | -1.600  | 0.00744 | 0.02916 |
| solute carrier family 7 (cationic amino acid transporter, y+ system), member 8              | SLC7A8   | -5.100  | 0.00010 | 0.00194 |

|                                                                                                              |            |         |         |         |
|--------------------------------------------------------------------------------------------------------------|------------|---------|---------|---------|
| solute carrier organic anion transporter family, member 2A1                                                  | SLCO2A1    | -4.395  | 0.03110 | 0.07326 |
| solute carrier organic anion transporter family, member 4A1                                                  | SLCO4A1    | -10.816 | 0.00467 | 0.02173 |
| somatostatin receptor 2                                                                                      | SSTR2      | 3.129   | 0.00099 | 0.00813 |
| son of sevenless homolog 2 (Drosophila)                                                                      | SOS2       | -1.544  | 0.00026 | 0.00355 |
| sorbin and SH3 domain containing 1                                                                           | SORBS1     | -2.681  | 0.00782 | 0.03004 |
| sorbitol dehydrogenase                                                                                       | SORD       | 2.260   | 0.00080 | 0.00710 |
| sortilin 1                                                                                                   | SORT1      | -1.710  | 0.00273 | 0.01527 |
| sorting nexin 13                                                                                             | SNX13      | -1.638  | 0.00266 | 0.01503 |
| sorting nexin 16                                                                                             | SNX16      | -1.646  | 0.00517 | 0.02315 |
| sorting nexin 18                                                                                             | SNX18      | 1.570   | 0.00010 | 0.00194 |
| sorting nexin 25                                                                                             | SNX25      | -1.518  | 0.00303 | 0.01637 |
| sorting nexin 33                                                                                             | SNX33      | 1.501   | 0.01080 | 0.03676 |
| sorting nexin family member 30                                                                               | SNX30      | 1.935   | 0.00005 | 0.00131 |
| SPARC related modular calcium binding 1                                                                      | SMOC1      | -4.062  | 0.04470 | 0.09177 |
| speckle-type POZ protein-like                                                                                | SPOPL      | -1.684  | 0.00551 | 0.02415 |
| spectrin repeat containing, nuclear envelope 2                                                               | SYNE2      | -3.335  | 0.03770 | 0.08278 |
| spectrin, alpha, non-erythrocytic 1 (alpha-fodrin)                                                           | SPTAN1     | 1.577   | 0.01350 | 0.04247 |
| spectrin, beta, non-erythrocytic 1                                                                           | SPTBN1     | 1.596   | 0.01250 | 0.04030 |
| spen homolog, transcriptional regulator (Drosophila)                                                         | SPEN       | -1.859  | 0.00541 | 0.02388 |
| sperm associated antigen 1                                                                                   | SPAG1      | 1.533   | 0.00521 | 0.02327 |
| sperm associated antigen 8                                                                                   | SPAG8      | 1.720   | 0.00037 | 0.00439 |
| spermatogenesis associated 18 homolog (rat)                                                                  | SPATA18    | 1.963   | 0.00469 | 0.02180 |
| S-phase kinase-associated protein 2 (p45)                                                                    | SKP2       | 1.616   | 0.00801 | 0.03052 |
| sphingosine-1-phosphate receptor 3                                                                           | S1PR3      | -3.598  | 0.04310 | 0.08982 |
| spindlin family, member 3                                                                                    | SPIN3      | 2.047   | 0.00003 | 0.00085 |
| splicing factor, arginine/serine-rich 12                                                                     | SFRS12     | -2.081  | 0.04000 | 0.08582 |
| splicing factor, arginine/serine-rich 3                                                                      | SFRS3      | -1.502  | 0.04010 | 0.08597 |
| spondin 1, extracellular matrix protein                                                                      | SPON1      | -2.192  | 0.02670 | 0.06637 |
| spondin 2, extracellular matrix protein                                                                      | SPON2      | 2.970   | 0.00012 | 0.00221 |
| sprouty homolog 4 (Drosophila)                                                                               | SPRY4      | -1.969  | 0.00029 | 0.00375 |
| Src-like-adaptor                                                                                             | SLA        | -3.822  | 0.00326 | 0.01718 |
| SRY (sex determining region Y)-box 13                                                                        | SOX13      | -1.784  | 0.00007 | 0.00163 |
| SRY (sex determining region Y)-box 4                                                                         | SOX4       | 1.539   | 0.00077 | 0.00688 |
| SRY (sex determining region Y)-box 6                                                                         | SOX6       | 1.674   | 0.00715 | 0.02841 |
| SRY (sex determining region Y)-box 8                                                                         | SOX8       | 3.137   | 0.00004 | 0.00104 |
| SRY (sex determining region Y)-box 9                                                                         | SOX9       | 1.590   | 0.02300 | 0.06018 |
| ST3 beta-galactoside alpha-2,3-sialyltransferase 1                                                           | ST3GAL1    | -3.104  | 0.00000 | 0.00007 |
| ST3 beta-galactoside alpha-2,3-sialyltransferase 4                                                           | ST3GAL4    | 2.199   | 0.00001 | 0.00051 |
| ST6 (alpha-N-acetyl-neuraminy-2,3-beta-galactosyl-1,3)-N-acetylgalactosaminide alpha-2,6-sialyltransferase 2 | ST6GALNAC2 | 2.667   | 0.00022 | 0.00315 |
| ST6 (alpha-N-acetyl-neuraminy-2,3-beta-galactosyl-1,3)-N-acetylgalactosaminide alpha-2,6-sialyltransferase 3 | ST6GALNAC3 | -5.162  | 0.00922 | 0.03333 |
| ST6 (alpha-N-acetyl-neuraminy-2,3-beta-galactosyl-1,3)-N-acetylgalactosaminide alpha-2,6-sialyltransferase 5 | ST6GALNAC5 | -30.205 | 0.03940 | 0.08504 |
| ST6 beta-galactosamide alpha-2,6-sialyltransferase 2                                                         | ST6GAL2    | -16.891 | 0.03800 | 0.08322 |
| ST8 alpha-N-acetyl-neuraminy-2,8-sialyltransferase 1                                                         | ST8SIA1    | 2.590   | 0.00039 | 0.00459 |
| STAM binding protein-like 1                                                                                  | STAMBPL1   | 5.981   | 0.00000 | 0.00007 |
| stanniocalcin 2                                                                                              | STC2       | -4.474  | 0.01620 | 0.04786 |
| STAR-related lipid transfer (START) domain containing 13                                                     | STAR13     | -1.548  | 0.00071 | 0.00657 |
| STAR-related lipid transfer (START) domain containing 4                                                      | STAR4      | -7.676  | 0.04170 | 0.08797 |
| STAR-related lipid transfer (START) domain containing 8                                                      | STAR8      | -2.057  | 0.00296 | 0.01611 |
| STAR-related lipid transfer (START) domain containing 9                                                      | STAR9      | 1.620   | 0.00130 | 0.00963 |

|                                                                                                      |               |        |         |         |
|------------------------------------------------------------------------------------------------------|---------------|--------|---------|---------|
| stathmin-like 3                                                                                      | STMN3         | 1.761  | 0.00003 | 0.00100 |
| STEAP family member 3                                                                                | STEAP3        | 3.067  | 0.00000 | 0.00005 |
| STEAP family member 4                                                                                | STEAP4        | 1.528  | 0.00943 | 0.03381 |
| STEAP family protein MGC87042                                                                        | MGC87042      | 2.175  | 0.00070 | 0.00654 |
| stearoyl-CoA desaturase (delta-9-desaturase)                                                         | SCD           | 4.430  | 0.00001 | 0.00051 |
| sterile alpha motif and leucine zipper containing kinase AZK                                         | ZAK           | -1.713 | 0.04680 | 0.09448 |
| sterile alpha motif domain containing 11                                                             | SAMD11        | 1.520  | 0.00496 | 0.02261 |
| sterile alpha motif domain containing 13                                                             | SAMD13        | 3.299  | 0.00002 | 0.00075 |
| sterile alpha motif domain containing 5                                                              | SAMD5         | 1.929  | 0.00626 | 0.02612 |
| sterile alpha motif domain containing 9                                                              | SAMD9         | 1.546  | 0.00007 | 0.00163 |
| sterile alpha motif domain containing 9-like                                                         | SAMD9L        | 1.945  | 0.00102 | 0.00824 |
| steroid-5-alpha-reductase, alpha polypeptide 1 (3-oxo-5 alpha-steroid delta 4-dehydrogenase alpha 1) | SRD5A1        | 1.902  | 0.00126 | 0.00945 |
| sterol regulatory element binding transcription factor 1                                             | SREBF1        | 1.577  | 0.01620 | 0.04786 |
| stimulated by retinoic acid gene 6 homolog (mouse)                                                   | STRA6         | 1.521  | 0.01950 | 0.05408 |
| stimulator of chondrogenesis 1                                                                       | SCRG1         | 1.879  | 0.00176 | 0.01166 |
| stonin 1                                                                                             | STON1         | -1.601 | 0.00424 | 0.02038 |
| stonin 2                                                                                             | STON2         | 2.428  | 0.00899 | 0.03288 |
| stratifin                                                                                            | SFN           | 3.767  | 0.02100 | 0.05688 |
| stromal interaction molecule 1                                                                       | STIM1         | -1.604 | 0.01800 | 0.05148 |
| SUB1 homolog ( <i>S. cerevisiae</i> )                                                                | SUB1          | -1.617 | 0.00223 | 0.01351 |
| sulfatase 2                                                                                          | SULF2         | 1.950  | 0.02770 | 0.06779 |
| SUMO1/sentrin specific peptidase 5                                                                   | SEN5          | -1.649 | 0.00013 | 0.00233 |
| SUMO1/sentrin/SMT3 specific peptidase 2                                                              | SEN2          | -1.621 | 0.04380 | 0.09061 |
| superoxide dismutase 2, mitochondrial                                                                | SOD2          | -2.318 | 0.00042 | 0.00476 |
| suppressor of cancer cell invasion                                                                   | SCAI          | 1.901  | 0.00254 | 0.01462 |
| suppressor of cytokine signaling 2                                                                   | SOCS2         | -2.383 | 0.04030 | 0.08623 |
| suppressor of cytokine signaling 3                                                                   | SOCS3         | -1.845 | 0.04340 | 0.09014 |
| survival of motor neuron 1, telomeric /// survival of motor neuron 2, centromeric                    | SMN1 /// SMN2 | -1.501 | 0.00366 | 0.01859 |
| sushi, von Willebrand factor type A, EGF and pentraxin domain containing 1                           | SVEP1         | -1.671 | 0.00498 | 0.02264 |
| sushi-repeat-containing protein, X-linked                                                            | SRPX          | -1.625 | 0.00908 | 0.03306 |
| SWI/SNF related, matrix associated, actin dependent regulator of chromatin, subfamily c, member 1    | SMARCC1       | -1.744 | 0.03470 | 0.07845 |
| synaptic vesicle glycoprotein 2A                                                                     | SV2A          | 1.985  | 0.00192 | 0.01240 |
| synaptogyrin 2                                                                                       | SYNGR2        | -2.722 | 0.02860 | 0.06929 |
| synaptojanin 2                                                                                       | SYNJ2         | 1.797  | 0.00371 | 0.01874 |
| synaptonemal complex protein SC65                                                                    | SC65          | 2.092  | 0.00002 | 0.00071 |
| synaptopodin                                                                                         | SYNPO         | 1.566  | 0.00215 | 0.01325 |
| synaptopodin 2                                                                                       | SYNPO2        | -3.665 | 0.00695 | 0.02793 |
| synaptotagmin XI                                                                                     | SYT11         | 1.830  | 0.00011 | 0.00206 |
| synaptotagmin XVII                                                                                   | SYT17         | 3.535  | 0.00003 | 0.00092 |
| syndecan 3                                                                                           | SDC3          | 1.547  | 0.00914 | 0.03316 |
| synovial sarcoma, X breakpoint 2 interacting protein                                                 | SSX2IP        | 2.842  | 0.00087 | 0.00747 |
| syntaphilin                                                                                          | SNPH          | 1.596  | 0.00005 | 0.00121 |
| syntaxin 10                                                                                          | STX10         | 1.663  | 0.00024 | 0.00335 |
| syntaxin 11                                                                                          | STX11         | -2.287 | 0.02540 | 0.06425 |
| syntrophin, alpha 1 (dystrophin-associated protein A1, 59kDa, acidic component)                      | SNTA1         | -2.627 | 0.04600 | 0.09346 |
| syntrophin, beta 1 (dystrophin-associated protein A1, 59kDa, basic component 1)                      | SNTB1         | 1.767  | 0.00136 | 0.00990 |
| synuclein, gamma (breast cancer-specific protein 1)                                                  | SNCG          | -1.533 | 0.02410 | 0.06209 |
| TAF5-like RNA polymerase II, p300/CBP-associated factor (PCAF)-                                      | TAF5L         | -2.428 | 0.00472 | 0.02190 |

|                                                                                  |               |        |         |         |
|----------------------------------------------------------------------------------|---------------|--------|---------|---------|
| associated factor, 65kDa                                                         |               |        |         |         |
| TAF8 RNA polymerase II, TATA box binding protein (TBP)-associated factor, 43kDa  | TAF8          | -1.711 | 0.03270 | 0.07574 |
| TAF9 RNA polymerase II, TATA box binding protein (TBP)-associated factor, 32kDa  | TAF9          | -1.540 | 0.01050 | 0.03614 |
| TAF9B RNA polymerase II, TATA box binding protein (TBP)-associated factor, 31kDa | TAF9B         | -1.636 | 0.03370 | 0.07709 |
| TAR (HIV-1) RNA binding protein 1                                                | TARBP1        | 1.519  | 0.01360 | 0.04266 |
| target of myb1-like 2 (chicken)                                                  | TOM1L2        | -1.752 | 0.02100 | 0.05688 |
| taspace, threonine aspartase, 1                                                  | TASP1         | -1.677 | 0.01350 | 0.04247 |
| TATA box binding protein (TBP)-associated factor, RNA polymerase I, A, 48kDa     | TAF1A         | 1.797  | 0.00257 | 0.01472 |
| TATA box binding protein (TBP)-associated factor, RNA polymerase I, B, 63kDa     | TAF1B         | 1.556  | 0.00379 | 0.01900 |
| TATA box binding protein (TBP)-associated factor, RNA polymerase I, D, 41kDa     | TAF1D         | -1.602 | 0.00007 | 0.00159 |
| TBC1 (tre-2/USP6, BUB2, cdc16) domain family, member 1                           | TBC1D1        | -2.281 | 0.00172 | 0.01151 |
| TBC1 domain family, member 24                                                    | TBC1D24       | 3.146  | 0.00000 | 0.00003 |
| TBC1 domain family, member 8B (with GRAM domain)                                 | TBC1D8B       | 2.278  | 0.00003 | 0.00097 |
| T-box 15                                                                         | TBX15         | 1.741  | 0.02000 | 0.05509 |
| TBP-like 1                                                                       | TBPL1         | -1.565 | 0.00320 | 0.01698 |
| TCDD-inducible poly(ADP-ribose) polymerase                                       | TIPARP        | -3.350 | 0.00153 | 0.01070 |
| T-cell acute lymphocytic leukemia 1                                              | TAL1          | -1.874 | 0.02770 | 0.06779 |
| T-cell lymphoma invasion and metastasis 2                                        | TIAM2         | 1.885  | 0.00477 | 0.02205 |
| TEA domain family member 3                                                       | TEAD3         | -2.679 | 0.00295 | 0.01606 |
| teashirt zinc finger homeobox 2                                                  | TSHZ2         | 1.943  | 0.01270 | 0.04072 |
| teashirt zinc finger homeobox 3                                                  | TSHZ3         | 1.949  | 0.00000 | 0.00023 |
| tenascin XA pseudogene /// tenascin XB                                           | TNXA /// TNXB | 2.145  | 0.00037 | 0.00434 |
| tenascin XB                                                                      | TNXB          | 2.313  | 0.00047 | 0.00507 |
| tensin 1                                                                         | TNS1          | -2.555 | 0.00076 | 0.00687 |
| tensin like C1 domain containing phosphatase (tensin 2)                          | TENC1         | -1.785 | 0.00003 | 0.00095 |
| testis expressed 11                                                              | TEX11         | 2.574  | 0.01480 | 0.04516 |
| testis specific, 14                                                              | TSGA14        | 1.714  | 0.00020 | 0.00297 |
| tet oncogene 1                                                                   | TET1          | 1.713  | 0.00008 | 0.00177 |
| tetraspanin 14                                                                   | TSPAN14       | -1.535 | 0.00001 | 0.00047 |
| tetraspanin 33                                                                   | TSPAN33       | 1.767  | 0.00608 | 0.02569 |
| tetraspanin 4                                                                    | TSPAN4        | 1.727  | 0.00603 | 0.02553 |
| tetratricopeptide repeat domain 30A                                              | TTC30A        | 1.699  | 0.00014 | 0.00241 |
| tetratricopeptide repeat domain 30B                                              | TTC30B        | 2.469  | 0.00001 | 0.00047 |
| tetratricopeptide repeat domain 7A                                               | TTC7A         | 1.520  | 0.00024 | 0.00333 |
| tetratricopeptide repeat domain 9C                                               | TTC9C         | 1.857  | 0.00038 | 0.00448 |
| tetratricopeptide repeat, ankyrin repeat and coiled-coil containing 2            | TANC2         | 2.499  | 0.00000 | 0.00013 |
| TGF beta-inducible nuclear protein 1                                             | TINP1         | -1.572 | 0.00084 | 0.00728 |
| TGFB-induced factor homeobox 1                                                   | TGIF1         | -8.595 | 0.00408 | 0.01990 |
| THAP domain containing, apoptosis associated protein 2                           | THAP2         | 2.305  | 0.00013 | 0.00228 |
| thioredoxin interacting protein                                                  | TXNIP         | -4.566 | 0.00000 | 0.00020 |
| thioredoxin reductase 1                                                          | TXNRD1        | -3.298 | 0.00000 | 0.00002 |
| thioredoxin-like 4B                                                              | TXNL4B        | -2.118 | 0.00185 | 0.01204 |
| threonine synthase-like 1 (S. cerevisiae)                                        | THNSL1        | 2.529  | 0.00000 | 0.00016 |
| Thrombospondin 1                                                                 | THBS1         | -3.693 | 0.04380 | 0.09061 |
| thrombospondin 3                                                                 | THBS3         | 1.807  | 0.00434 | 0.02068 |
| thrombospondin 4                                                                 | THBS4         | -6.097 | 0.04250 | 0.08908 |
| thromboxane A synthase 1 (platelet)                                              | TBXAS1        | -1.522 | 0.01930 | 0.05384 |
| Thy-1 cell surface antigen                                                       | THY1          | 2.229  | 0.04020 | 0.08609 |



|                                                                                  |                         |        |         |         |
|----------------------------------------------------------------------------------|-------------------------|--------|---------|---------|
| thymic stromal lymphopoietin                                                     | TSLP                    | -2.122 | 0.02780 | 0.06797 |
| thymidylate synthetase                                                           | TYMS                    | 3.347  | 0.00016 | 0.00259 |
| tigger transposable element derived 1                                            | TIGD1                   | 1.766  | 0.00133 | 0.00977 |
| tigger transposable element derived 2                                            | TIGD2                   | 1.551  | 0.02060 | 0.05620 |
| tight junction protein 2 (zona occludens 2)                                      | TJP2                    | -1.909 | 0.00653 | 0.02686 |
| TIMP metalloproteinase inhibitor 3                                               | TIMP3                   | 1.504  | 0.00698 | 0.02801 |
| Tissue factor pathway inhibitor (lipoprotein-associated coagulation inhibitor)   | TFPI                    | -2.904 | 0.02250 | 0.05936 |
| TLR4 interactor with leucine rich repeats                                        | TRIL                    | 10.025 | 0.00000 | 0.00002 |
| TNFAIP3 interacting protein 1                                                    | TNIP1                   | -1.615 | 0.01580 | 0.04710 |
| toll-like receptor 1                                                             | TLR1                    | 1.542  | 0.03330 | 0.07653 |
| toll-like receptor 2                                                             | TLR2                    | -5.470 | 0.00795 | 0.03033 |
| toll-like receptor 3                                                             | TLR3                    | 3.880  | 0.00000 | 0.00013 |
| toll-like receptor 5                                                             | TLR5                    | 1.535  | 0.03200 | 0.07469 |
| toll-like receptor 7                                                             | TLR7                    | 3.765  | 0.00031 | 0.00390 |
| toll-like receptor adaptor molecule 2 /// TMED7-TICAM2 read-through transcript   | TICAM2 /// TMED7-TICAM2 | 1.830  | 0.00348 | 0.01797 |
| topoisomerase (DNA) I                                                            | TOP1                    | -1.542 | 0.00000 | 0.00006 |
| TPTE and PTEN homologous inositol lipid phosphatase pseudogene                   | LOC374491               | 1.603  | 0.00744 | 0.02916 |
| TPTE pseudogene                                                                  | psiTPTE22               | 2.880  | 0.00659 | 0.02702 |
| TRAF2 and NCK interacting kinase                                                 | TNIK                    | 1.952  | 0.00829 | 0.03120 |
| transcription elongation factor A (SII) N-terminal and central domain containing | TCEANC                  | 1.666  | 0.00135 | 0.00986 |
| transcription elongation factor A (SII), 3                                       | TCEA3                   | 1.799  | 0.00212 | 0.01315 |
| transcription elongation factor A (SII)-like 1                                   | TCEAL1                  | -2.122 | 0.00002 | 0.00084 |
| transcription elongation factor A (SII)-like 3                                   | TCEAL3                  | -1.510 | 0.00031 | 0.00390 |
| transcription elongation factor A (SII)-like 4                                   | TCEAL4                  | -1.873 | 0.00002 | 0.00078 |
| transcription elongation factor A (SII)-like 7                                   | TCEAL7                  | 1.796  | 0.01120 | 0.03762 |
| transcription factor 12                                                          | TCF12                   | 1.549  | 0.00051 | 0.00539 |
| transcription factor 19                                                          | TCF19                   | 2.539  | 0.00000 | 0.00009 |
| transcription factor 3 (E2A immunoglobulin enhancer binding factors E12/E47)     | TCF3                    | 1.640  | 0.00002 | 0.00067 |
| transcription factor 4                                                           | TCF4                    | 1.987  | 0.00002 | 0.00071 |
| transcription factor CP2-like 1                                                  | TFCP2L1                 | -1.943 | 0.00474 | 0.02196 |
| transcription factor Dp-2 (E2F dimerization partner 2)                           | TFDP2                   | -1.655 | 0.00353 | 0.01814 |
| transcription factor EC                                                          | TFEC                    | -2.777 | 0.02750 | 0.06753 |
| transcriptional regulating factor 1                                              | TRERF1                  | 5.877  | 0.00000 | 0.00002 |
| transducer of ERBB2, 2                                                           | TOB2                    | -2.732 | 0.00585 | 0.02508 |
| transducin-like enhancer of split 1 (E(sp1) homolog, Drosophila)                 | TLE1                    | -2.726 | 0.00008 | 0.00169 |
| transducin-like enhancer of split 3 (E(sp1) homolog, Drosophila)                 | TLE3                    | 1.588  | 0.00001 | 0.00034 |
| transferrin receptor (p90, CD71)                                                 | TFRC                    | -2.123 | 0.00012 | 0.00225 |
| transformer 2 beta homolog (Drosophila)                                          | TRA2B                   | -2.440 | 0.00175 | 0.01163 |
| transforming growth factor, beta 2                                               | TGFB2                   | 2.417  | 0.00177 | 0.01170 |
| transforming growth factor, beta 3                                               | TGFB3                   | 2.020  | 0.00028 | 0.00368 |
| transforming growth factor, beta receptor III                                    | TGFBR3                  | -1.585 | 0.02520 | 0.06393 |
| transforming, acidic coiled-coil containing protein 1                            | TACC1                   | -1.869 | 0.00375 | 0.01887 |
| transgelin                                                                       | TAGLN                   | -5.957 | 0.00825 | 0.03111 |
| transgelin 2                                                                     | TAGLN2                  | 1.787  | 0.00001 | 0.00052 |
| transglutaminase 2 (C polypeptide, protein-glutamine-gamma-glutamyltransferase)  | TGM2                    | -2.754 | 0.02680 | 0.06645 |
| transient receptor potential cation channel, subfamily C, member 4               | TRPC4                   | -3.320 | 0.02230 | 0.05907 |
| transient receptor potential cation channel, subfamily V, member 2               | TRPV2                   | 2.180  | 0.00000 | 0.00016 |
| translocase of inner mitochondrial membrane 23 homolog (yeast)                   | TIMM23                  | -2.417 | 0.00017 | 0.00276 |

|                                                                        |                             |        |         |         |
|------------------------------------------------------------------------|-----------------------------|--------|---------|---------|
| translocase of outer mitochondrial membrane 22 homolog (yeast)         | TOMM22                      | -1.571 | 0.04770 | 0.09571 |
| translocation associated membrane protein 1-like 1                     | TRAM1L1                     | 3.641  | 0.00000 | 0.00016 |
| translocation associated membrane protein 2                            | TRAM2                       | 2.460  | 0.00162 | 0.01108 |
| transmembrane and coiled-coil domain family 3                          | TMCC3                       | -2.466 | 0.01090 | 0.03700 |
| transmembrane and tetratricopeptide repeat containing 2                | TMTC2                       | 5.610  | 0.00133 | 0.00977 |
| transmembrane and tetratricopeptide repeat containing 4                | TMTC4                       | 1.921  | 0.00947 | 0.03392 |
| transmembrane anterior posterior transformation 1                      | TAPT1                       | -1.836 | 0.00002 | 0.00076 |
| Transmembrane emp24 protein transport domain containing 5              | TMED5                       | -1.985 | 0.00222 | 0.01349 |
| transmembrane protein 106A                                             | TMEM106A                    | 1.897  | 0.00000 | 0.00006 |
| transmembrane protein 107                                              | TMEM107                     | 1.957  | 0.00125 | 0.00941 |
| transmembrane protein 130                                              | TMEM130                     | -9.515 | 0.04310 | 0.08982 |
| transmembrane protein 132B                                             | TMEM132B                    | 1.547  | 0.00002 | 0.00061 |
| transmembrane protein 132E                                             | TMEM132E                    | 2.597  | 0.00030 | 0.00384 |
| transmembrane protein 150A                                             | TMEM150A                    | -1.623 | 0.00004 | 0.00111 |
| transmembrane protein 154                                              | TMEM154                     | 1.585  | 0.03610 | 0.08054 |
| transmembrane protein 159                                              | TMEM159                     | -1.767 | 0.00063 | 0.00616 |
| transmembrane protein 164                                              | TMEM164                     | -1.839 | 0.01040 | 0.03593 |
| transmembrane protein 17                                               | TMEM17                      | 1.971  | 0.00003 | 0.00091 |
| transmembrane protein 18                                               | TMEM18                      | -1.794 | 0.00012 | 0.00218 |
| transmembrane protein 180                                              | TMEM180                     | 1.509  | 0.00099 | 0.00809 |
| transmembrane protein 192 /// zinc finger protein 320                  | TMEM192 ///<br>ZNF320       | -1.696 | 0.00076 | 0.00687 |
| transmembrane protein 20                                               | TMEM20                      | 1.720  | 0.00398 | 0.01958 |
| transmembrane protein 204                                              | TMEM204                     | -1.900 | 0.01300 | 0.04135 |
| transmembrane protein 206                                              | TMEM206                     | 1.809  | 0.02190 | 0.05840 |
| transmembrane protein 37                                               | TMEM37                      | 2.058  | 0.00026 | 0.00346 |
| transmembrane protein 38B                                              | TMEM38B                     | -3.049 | 0.00549 | 0.02412 |
| transmembrane protein 44                                               | TMEM44                      | 1.742  | 0.00577 | 0.02484 |
| transmembrane protein 71                                               | TMEM71                      | 1.623  | 0.03180 | 0.07441 |
| transmembrane protein 97                                               | TMEM97                      | -2.826 | 0.00808 | 0.03069 |
| transmembrane protein with EGF-like and two follistatin-like domains 2 | TMEFF2                      | -9.995 | 0.00480 | 0.02217 |
| Transportin 1                                                          | TNPO1                       | -2.886 | 0.04710 | 0.09487 |
| tribbles homolog 3 (Drosophila)                                        | TRIB3                       | 2.122  | 0.00033 | 0.00406 |
| trichoplein, keratin filament binding                                  | TCHP                        | 1.512  | 0.00000 | 0.00024 |
| trichorhinophalangeal syndrome I                                       | TRPS1                       | 1.600  | 0.00205 | 0.01291 |
| triggering receptor expressed on myeloid cells 2                       | TREM2                       | 1.655  | 0.02970 | 0.07100 |
| tripartite motif-containing 2                                          | TRIM2                       | 1.691  | 0.00002 | 0.00080 |
| tripartite motif-containing 25                                         | TRIM25                      | 2.057  | 0.00386 | 0.01921 |
| tripartite motif-containing 34 /// TRIM6-TRIM34 readthrough transcript | TRIM34 /// TRIM6-<br>TRIM34 | 2.860  | 0.00000 | 0.00025 |
| tripartite motif-containing 45                                         | TRIM45                      | 1.768  | 0.00010 | 0.00198 |
| tripartite motif-containing 47                                         | TRIM47                      | 1.644  | 0.00590 | 0.02518 |
| tripartite motif-containing 59                                         | TRIM59                      | 2.381  | 0.00163 | 0.01112 |
| tripartite motif-containing 6                                          | TRIM6                       | 3.553  | 0.00006 | 0.00145 |
| tripartite motif-containing 61                                         | TRIM61                      | 1.808  | 0.00111 | 0.00874 |
| tripartite motif-containing 7                                          | TRIM7                       | 2.260  | 0.00007 | 0.00159 |
| tripartite motif-containing 8                                          | TRIM8                       | 1.550  | 0.00000 | 0.00019 |
| tRNA-histidine guanylyltransferase 1-like (S. cerevisiae)              | THG1L                       | -1.551 | 0.00089 | 0.00758 |
| trophinin                                                              | TRO                         | 1.764  | 0.00010 | 0.00200 |
| tropomyosin 2 (beta)                                                   | TPM2                        | -5.273 | 0.00369 | 0.01867 |
| TSC22 domain family, member 1                                          | TSC22D1                     | -2.820 | 0.00252 | 0.01454 |
| TSC22 domain family, member 3                                          | TSC22D3                     | -5.016 | 0.00031 | 0.00388 |

|                                                                                                  |                      |        |         |         |
|--------------------------------------------------------------------------------------------------|----------------------|--------|---------|---------|
| TSPY-like 2                                                                                      | TSPYL2               | -1.974 | 0.00000 | 0.00026 |
| tubby homolog (mouse)                                                                            | TUB                  | 1.635  | 0.00691 | 0.02779 |
| tubulin tyrosine ligase-like family, member 1                                                    | TLL1                 | 1.693  | 0.00082 | 0.00718 |
| tubulin, beta 2A                                                                                 | TUBB2A               | 2.099  | 0.00000 | 0.00021 |
| tubulin, beta 2A /// tubulin, beta 2B                                                            | TUBB2A ///<br>TUBB2B | 1.697  | 0.00239 | 0.01411 |
| tubulin, beta 2B                                                                                 | TUBB2B               | 6.329  | 0.00009 | 0.00179 |
| tubulointerstitial nephritis antigen-like 1                                                      | TINAGL1              | -2.090 | 0.00772 | 0.02978 |
| tudor domain containing 9                                                                        | TDRD9                | -1.938 | 0.02110 | 0.05698 |
| tumor necrosis factor (ligand) superfamily, member 10                                            | TNFSF10              | 2.605  | 0.00162 | 0.01108 |
| tumor necrosis factor (ligand) superfamily, member 13b                                           | TNFSF13B             | 6.244  | 0.00002 | 0.00073 |
| tumor necrosis factor receptor superfamily, member 10c, decoy without an intracellular domain    | TNFRSF10C            | 2.412  | 0.00001 | 0.00041 |
| tumor necrosis factor receptor superfamily, member 21                                            | TNFRSF21             | 2.338  | 0.00685 | 0.02765 |
| tumor necrosis factor receptor superfamily, member 25                                            | TNFRSF25             | 2.684  | 0.00130 | 0.00963 |
| tumor necrosis factor receptor superfamily, member 8                                             | TNFRSF8              | 1.625  | 0.00008 | 0.00167 |
| tumor necrosis factor, alpha-induced protein 2                                                   | TNFAIP2              | 1.766  | 0.00519 | 0.02322 |
| tumor necrosis factor, alpha-induced protein 6                                                   | TNFAIP6              | 5.420  | 0.00003 | 0.00091 |
| tumor protein p53 inducible nuclear protein 2                                                    | TP53INP2             | -2.503 | 0.02560 | 0.06458 |
| tumor protein p53 inducible protein 3                                                            | TP53I3               | 2.263  | 0.00161 | 0.01104 |
| tumor protein p63                                                                                | TP63                 | 1.897  | 0.00001 | 0.00033 |
| tyrosylprotein sulfotransferase 1                                                                | TPST1                | 2.052  | 0.00066 | 0.00634 |
| ubiquinol-cytochrome c reductase binding protein                                                 | UQCRB                | -1.948 | 0.02730 | 0.06721 |
| ubiquinol-cytochrome c reductase hinge protein                                                   | UQCRH                | -1.893 | 0.03980 | 0.08562 |
| ubiquitin protein ligase E3A                                                                     | UBE3A                | -1.686 | 0.00266 | 0.01503 |
| ubiquitin protein ligase E3B                                                                     | UBE3B                | -2.142 | 0.02970 | 0.07100 |
| ubiquitin specific peptidase 10                                                                  | USP10                | -1.649 | 0.03930 | 0.08491 |
| ubiquitin specific peptidase 15                                                                  | USP15                | -1.889 | 0.00001 | 0.00033 |
| ubiquitin specific peptidase 18                                                                  | USP18                | 1.682  | 0.01010 | 0.03532 |
| ubiquitin specific peptidase 25                                                                  | USP25                | -2.274 | 0.00035 | 0.00422 |
| ubiquitin specific peptidase 31                                                                  | USP31                | -1.680 | 0.01540 | 0.04633 |
| ubiquitin specific peptidase 33                                                                  | USP33                | -2.113 | 0.02250 | 0.05936 |
| ubiquitin specific peptidase 53                                                                  | USP53                | -2.244 | 0.00250 | 0.01447 |
| ubiquitin-conjugating enzyme E2B (RAD6 homolog)                                                  | UBE2B                | -1.509 | 0.04830 | 0.09639 |
| ubiquitin-conjugating enzyme E2D 1 (UBC4/5 homolog, yeast)                                       | UBE2D1               | -1.850 | 0.01400 | 0.04354 |
| ubiquitin-conjugating enzyme E2G 1 (UBC7 homolog, yeast)                                         | UBE2G1               | -1.592 | 0.00053 | 0.00553 |
| ubiquitin-conjugating enzyme E2N (UBC13 homolog, yeast)                                          | UBE2N                | -1.880 | 0.00493 | 0.02252 |
| ubiquitin-conjugating enzyme E2S                                                                 | UBE2S                | -1.712 | 0.00297 | 0.01614 |
| ubiquitin-conjugating enzyme E2W (putative)                                                      | UBE2W                | -1.586 | 0.00041 | 0.00471 |
| ubiquitin-like modifier activating enzyme 2                                                      | UBA2                 | -1.796 | 0.00120 | 0.00917 |
| ubiquitin-like modifier activating enzyme 7                                                      | UBA7                 | 1.664  | 0.00404 | 0.01978 |
| UBX domain protein 7                                                                             | UBXN7                | -1.603 | 0.01240 | 0.04009 |
| UDP-Gal:betaGlcNAc beta 1,3-galactosyltransferase, polypeptide 4                                 | B3GALT4              | 1.735  | 0.00000 | 0.00007 |
| UDP-Gal:betaGlcNAc beta 1,4- galactosyltransferase, polypeptide 1                                | B4GALT1              | -5.979 | 0.00065 | 0.00626 |
| UDP-Gal:betaGlcNAc beta 1,4- galactosyltransferase, polypeptide 2                                | B4GALT2              | 2.510  | 0.00000 | 0.00029 |
| UDP-GlcNAc:betaGal beta-1,3-N-acetylglucosaminyltransferase 2                                    | B3GNT2               | -1.914 | 0.00028 | 0.00362 |
| UDP-GlcNAc:betaGal beta-1,3-N-acetylglucosaminyltransferase 7                                    | B3GNT7               | 2.535  | 0.00025 | 0.00338 |
| UDP-GlcNAc:betaGal beta-1,3-N-acetylglucosaminyltransferase 9                                    | B3GNT9               | 1.555  | 0.00000 | 0.00006 |
| UDP-N-acetyl-alpha-D-galactosamine:polypeptide N-acetylgalactosaminyltransferase 12 (GalNAc-T12) | GALNT12              | 3.257  | 0.00006 | 0.00152 |
| UDP-N-acetyl-alpha-D-galactosamine:polypeptide N-acetylgalactosaminyltransferase 5 (GalNAc-T5)   | GALNT5               | 3.562  | 0.00028 | 0.00366 |
| UDP-N-acetyl-alpha-D-galactosamine:polypeptide N-                                                | GALNTL1              | 3.466  | 0.00016 | 0.00264 |

|                                                                             |              |         |         |         |
|-----------------------------------------------------------------------------|--------------|---------|---------|---------|
| acetylgalactosaminyltransferase-like 1                                      |              |         |         |         |
| UDP-N-acteylglucosamine pyrophosphorylase 1-like 1                          | UAP1L1       | 1.861   | 0.00045 | 0.00492 |
| UL16 binding protein 2                                                      | ULBP2        | 1.901   | 0.00036 | 0.00429 |
| Unc-5 homolog B (C. elegans)                                                | UNC5B        | 1.794   | 0.00001 | 0.00061 |
| unc-5 homolog C (C. elegans)                                                | UNC5C        | 2.219   | 0.00712 | 0.02836 |
| Uncharacterized protein LOC100131897                                        | LOC100131897 | 4.643   | 0.00288 | 0.01578 |
| uncharacterized serine/threonine-protein kinase SgK494                      | FLJ25006     | 1.682   | 0.00273 | 0.01527 |
| uncoupling protein 2 (mitochondrial, proton carrier)                        | UCP2         | 1.702   | 0.01160 | 0.03843 |
| unkempt homolog (Drosophila)                                                | UNK          | 1.550   | 0.00027 | 0.00360 |
| up-regulated during skeletal muscle growth 5 homolog (mouse)                | USMG5        | -1.527  | 0.01420 | 0.04393 |
| uridine-cytidine kinase 2                                                   | UCK2         | 2.018   | 0.00066 | 0.00629 |
| uveal autoantigen with coiled-coil domains and ankyrin repeats              | UACA         | 1.504   | 0.03340 | 0.07666 |
| vacuolar protein sorting 37 homolog A (S. cerevisiae)                       | VPS37A       | -1.898  | 0.01170 | 0.03865 |
| v-akt murine thymoma viral oncogene homolog 3 (protein kinase B, gamma)     | AKT3         | -1.703  | 0.00717 | 0.02847 |
| vang-like 1 (van gogh, Drosophila)                                          | VANGL1       | 2.429   | 0.00010 | 0.00199 |
| vasodilator-stimulated phosphoprotein                                       | VASP         | -2.429  | 0.02250 | 0.05936 |
| vav 2 guanine nucleotide exchange factor                                    | VAV2         | 1.627   | 0.00000 | 0.00003 |
| vav 3 guanine nucleotide exchange factor                                    | VAV3         | 2.146   | 0.00357 | 0.01828 |
| v-erb-a erythroblastic leukemia viral oncogene homolog 4 (avian)            | ERBB4        | 1.867   | 0.02520 | 0.06393 |
| versican                                                                    | VCAN         | 1.505   | 0.04060 | 0.08656 |
| vesicle amine transport protein 1 homolog (T. californica)                  | VAT1         | 1.719   | 0.00000 | 0.00009 |
| vesicular, overexpressed in cancer, prosurvival protein 1                   | VOPP1        | 1.598   | 0.00000 | 0.00013 |
| vestigial like 3 (Drosophila)                                               | VGLL3        | -5.040  | 0.00000 | 0.00016 |
| v-ets erythroblastosis virus E26 oncogene homolog 2 (avian)                 | ETS2         | 1.675   | 0.00005 | 0.00126 |
| vezatin, adherens junctions transmembrane protein                           | VEZT         | -2.119  | 0.00014 | 0.00238 |
| villin-like                                                                 | VILL         | 2.011   | 0.00325 | 0.01716 |
| vinculin                                                                    | VCL          | -4.349  | 0.04510 | 0.09228 |
| vitamin D (1,25- dihydroxyvitamin D3) receptor                              | VDR          | 1.626   | 0.01960 | 0.05427 |
| vitrin                                                                      | VIT          | -3.355  | 0.02080 | 0.05655 |
| v-maf musculoaponeurotic fibrosarcoma oncogene homolog (avian)              | MAF          | 1.983   | 0.00642 | 0.02654 |
| v-maf musculoaponeurotic fibrosarcoma oncogene homolog F (avian)            | MAFF         | -3.253  | 0.00004 | 0.00108 |
| v-maf musculoaponeurotic fibrosarcoma oncogene homolog K (avian)            | MAFK         | -1.500  | 0.00079 | 0.00703 |
| v-myb myeloblastosis viral oncogene homolog (avian)-like 1                  | MYBL1        | -8.493  | 0.00025 | 0.00339 |
| v-myc myelocytomatosis viral oncogene homolog (avian)                       | MYC          | -2.732  | 0.00123 | 0.00930 |
| voltage-dependent anion channel 1                                           | VDAC1        | -1.623  | 0.02630 | 0.06575 |
| voltage-dependent anion channel 2                                           | VDAC2        | -1.602  | 0.01390 | 0.04334 |
| von Hippel-Lindau tumor suppressor                                          | VHL          | 1.630   | 0.00039 | 0.00458 |
| von Willebrand factor A domain containing 5A                                | VWA5A        | 3.395   | 0.00034 | 0.00415 |
| v-raf murine sarcoma viral oncogene homolog B1                              | BRAF         | -1.856  | 0.00840 | 0.03145 |
| WAP four-disulfide core domain 1                                            | WFDC1        | -74.326 | 0.00518 | 0.02319 |
| WAS protein family, member 1                                                | WASF1        | -2.354  | 0.00023 | 0.00328 |
| WAS protein family, member 3                                                | WASF3        | -1.540  | 0.03040 | 0.07216 |
| WAS protein homolog associated with actin, golgi membranes and microtubules | WHAMM        | -1.674  | 0.00000 | 0.00024 |
| WD repeat and FYVE domain containing 2                                      | WDFY2        | -1.716  | 0.00738 | 0.02900 |
| WD repeat domain 1                                                          | WDR1         | -2.214  | 0.04110 | 0.08721 |
| WD repeat domain 17                                                         | WDR17        | 1.694   | 0.00563 | 0.02447 |
| WD repeat domain 33                                                         | WDR33        | -1.516  | 0.00943 | 0.03381 |
| WD repeat domain 51B                                                        | WDR51B       | -1.532  | 0.00399 | 0.01960 |
| WD repeat domain 54                                                         | WDR54        | 1.507   | 0.00202 | 0.01279 |
| WD repeat domain 5B                                                         | WDR5B        | 1.623   | 0.00063 | 0.00616 |

|                                                       |                  |         |         |         |
|-------------------------------------------------------|------------------|---------|---------|---------|
| WEE1 homolog ( <i>S. pombe</i> )                      | WEE1             | -5.926  | 0.00065 | 0.00623 |
| Wilms tumor 1 associated protein                      | WTAP             | -1.885  | 0.00061 | 0.00601 |
| Wilms tumor 1 interacting protein                     | WTIP             | -2.093  | 0.01860 | 0.05251 |
| wingless-type MMTV integration site family, member 3  | WNT3             | 1.645   | 0.00871 | 0.03223 |
| wingless-type MMTV integration site family, member 5A | WNT5A            | -6.090  | 0.04050 | 0.08643 |
| wingless-type MMTV integration site family, member 5B | WNT5B            | 1.790   | 0.03530 | 0.07928 |
| wingless-type MMTV integration site family, member 9A | WNT9A            | 1.932   | 0.00093 | 0.00783 |
| WNK lysine deficient protein kinase 3                 | WNK3             | -15.929 | 0.00012 | 0.00226 |
| WNT1 inducible signaling pathway protein 1            | WISP1            | 4.249   | 0.00008 | 0.00170 |
| Wolf-Hirschhorn syndrome candidate 1-like 1           | WHSC1L1          | 1.594   | 0.00207 | 0.01298 |
| WW and C2 domain containing 2                         | WWC2             | -1.560  | 0.03210 | 0.07482 |
| WW domain containing E3 ubiquitin protein ligase 2    | WWP2             | 2.567   | 0.00000 | 0.00013 |
| xenotropic and polytropic retrovirus receptor         | XPR1             | -1.678  | 0.02830 | 0.06878 |
| Xg blood group                                        | XG               | 2.549   | 0.00043 | 0.00477 |
| XIAP associated factor 1                              | XAF1             | 1.533   | 0.00184 | 0.01201 |
| X-prolyl aminopeptidase (aminopeptidase P) 1, soluble | XPNPEP1          | 1.581   | 0.00268 | 0.01509 |
| xylosyltransferase I                                  | XYLT1            | 2.256   | 0.00002 | 0.00077 |
| xylosyltransferase II                                 | XYLT2            | 1.514   | 0.00001 | 0.00049 |
| Y box binding protein 1                               | YBX1             | -1.850  | 0.00128 | 0.00954 |
| Yes-associated protein 1, 65kDa                       | YAP1             | -2.722  | 0.00697 | 0.02800 |
| yippee-like 4 ( <i>Drosophila</i> )                   | YPEL4            | 1.733   | 0.03010 | 0.07169 |
| yrdC domain containing ( <i>E. coli</i> )             | YRDC             | -1.765  | 0.00018 | 0.00285 |
| YTH domain containing 1                               | YTHDC1           | -1.505  | 0.02850 | 0.06912 |
| YY1 associated factor 2                               | YAF2             | -2.933  | 0.00314 | 0.01674 |
| zinc and ring finger 3                                | ZNRF3            | -1.659  | 0.00246 | 0.01434 |
| zinc finger and BTB domain containing 16              | ZBTB16           | -7.632  | 0.00000 | 0.00004 |
| zinc finger and BTB domain containing 46              | ZBTB46           | 1.548   | 0.00812 | 0.03080 |
| zinc finger and BTB domain containing 7C              | ZBTB7C           | 3.476   | 0.00000 | 0.00004 |
| zinc finger and SCAN domain containing 2              | ZSCAN2           | 1.579   | 0.00016 | 0.00265 |
| zinc finger CCCH-type containing 12B                  | ZC3H12B          | 1.599   | 0.00558 | 0.02433 |
| zinc finger CCCH-type containing 12C                  | ZC3H12C          | -1.775  | 0.00004 | 0.00110 |
| zinc finger CCCH-type, antiviral 1-like               | ZC3HAV1L         | 1.688   | 0.00001 | 0.00049 |
| zinc finger protein 114                               | ZNF114           | 3.076   | 0.00000 | 0.00020 |
| zinc finger protein 135                               | ZNF135           | 1.565   | 0.00040 | 0.00463 |
| zinc finger protein 161 homolog (mouse)               | ZFP161           | 1.847   | 0.00062 | 0.00609 |
| zinc finger protein 167                               | ZNF167           | 1.706   | 0.00051 | 0.00537 |
| zinc finger protein 180                               | ZNF180           | 1.733   | 0.00089 | 0.00760 |
| zinc finger protein 184                               | ZNF184           | 1.645   | 0.00062 | 0.00609 |
| zinc finger protein 20 /// zinc finger protein 625    | ZNF20 /// ZNF625 | 1.652   | 0.00057 | 0.00578 |
| zinc finger protein 233                               | ZNF233           | 1.838   | 0.00109 | 0.00863 |
| zinc finger protein 250                               | ZNF250           | 1.517   | 0.00012 | 0.00226 |
| zinc finger protein 252                               | ZNF252           | 1.565   | 0.00626 | 0.02612 |
| zinc finger protein 273                               | ZNF273           | 1.526   | 0.00779 | 0.02998 |
| zinc finger protein 285A                              | ZNF285A          | 1.796   | 0.00042 | 0.00476 |
| zinc finger protein 30                                | ZNF30            | 1.680   | 0.00023 | 0.00328 |
| Zinc finger protein 302                               | ZNF302           | 1.616   | 0.01900 | 0.05324 |
| zinc finger protein 326                               | ZNF326           | -2.405  | 0.01930 | 0.05384 |
| zinc finger protein 33B                               | ZNF33B           | -2.144  | 0.00122 | 0.00926 |
| zinc finger protein 36, C3H type, homolog (mouse)     | ZFP36            | -4.776  | 0.00000 | 0.00005 |
| zinc finger protein 36, C3H type-like 2               | ZFP36L2          | -2.209  | 0.00128 | 0.00954 |
| zinc finger protein 365                               | ZNF365           | 2.758   | 0.00004 | 0.00119 |

|                                          |          |         |         |         |
|------------------------------------------|----------|---------|---------|---------|
| zinc finger protein 367                  | ZNF367   | -1.779  | 0.00639 | 0.02646 |
| zinc finger protein 382                  | ZNF382   | 1.546   | 0.00003 | 0.00091 |
| zinc finger protein 385B                 | ZNF385B  | -12.011 | 0.01480 | 0.04516 |
| zinc finger protein 396                  | ZNF396   | 1.778   | 0.04210 | 0.08854 |
| zinc finger protein 397 opposite strand  | ZNF397OS | 1.517   | 0.00395 | 0.01948 |
| zinc finger protein 398                  | ZNF398   | 1.527   | 0.02210 | 0.05872 |
| zinc finger protein 423                  | ZNF423   | 2.166   | 0.00025 | 0.00338 |
| zinc finger protein 436                  | ZNF436   | 1.955   | 0.00002 | 0.00061 |
| zinc finger protein 441                  | ZNF441   | 1.611   | 0.00802 | 0.03055 |
| zinc finger protein 443                  | ZNF443   | 1.576   | 0.00013 | 0.00228 |
| zinc finger protein 469                  | ZNF469   | 1.974   | 0.00045 | 0.00492 |
| zinc finger protein 512B                 | ZNF512B  | 1.594   | 0.00005 | 0.00125 |
| zinc finger protein 518B                 | ZNF518B  | -2.243  | 0.03940 | 0.08504 |
| zinc finger protein 519                  | ZNF519   | 2.211   | 0.00001 | 0.00041 |
| zinc finger protein 521                  | ZNF521   | 2.137   | 0.00041 | 0.00471 |
| zinc finger protein 540                  | ZNF540   | 1.718   | 0.00818 | 0.03094 |
| zinc finger protein 571                  | ZNF571   | 1.611   | 0.00403 | 0.01976 |
| zinc finger protein 575                  | ZNF575   | 1.663   | 0.00004 | 0.00113 |
| zinc finger protein 599                  | ZNF599   | 1.780   | 0.00887 | 0.03264 |
| zinc finger protein 605                  | ZNF605   | 1.612   | 0.00002 | 0.00075 |
| zinc finger protein 606                  | ZNF606   | 1.785   | 0.00008 | 0.00171 |
| zinc finger protein 610                  | ZNF610   | 1.606   | 0.00104 | 0.00835 |
| zinc finger protein 624                  | ZNF624   | 2.545   | 0.00000 | 0.00018 |
| zinc finger protein 64 homolog (mouse)   | ZFP64    | 1.598   | 0.00002 | 0.00072 |
| zinc finger protein 642                  | ZNF642   | 2.182   | 0.00172 | 0.01151 |
| zinc finger protein 655                  | ZNF655   | -1.723  | 0.00968 | 0.03435 |
| zinc finger protein 667                  | ZNF667   | 1.808   | 0.00200 | 0.01271 |
| zinc finger protein 668                  | ZNF668   | 1.573   | 0.00006 | 0.00145 |
| zinc finger protein 671                  | ZNF671   | 1.907   | 0.00026 | 0.00350 |
| zinc finger protein 678                  | ZNF678   | 1.644   | 0.01960 | 0.05427 |
| Zinc finger protein 70                   | ZNF70    | 2.182   | 0.00001 | 0.00050 |
| zinc finger protein 703                  | ZNF703   | -1.750  | 0.00664 | 0.02715 |
| zinc finger protein 709                  | ZNF709   | 1.663   | 0.00116 | 0.00899 |
| zinc finger protein 780A                 | ZNF780A  | 1.558   | 0.00049 | 0.00523 |
| zinc finger protein 785                  | ZNF785   | 1.780   | 0.00001 | 0.00059 |
| zinc finger protein 786                  | ZNF786   | 1.658   | 0.00014 | 0.00243 |
| zinc finger protein 79                   | ZNF79    | 1.722   | 0.00005 | 0.00121 |
| zinc finger protein 82 homolog (mouse)   | ZFP82    | 2.353   | 0.00001 | 0.00039 |
| zinc finger protein 821                  | ZNF821   | 1.676   | 0.00000 | 0.00020 |
| zinc finger protein 826                  | ZNF826   | 1.951   | 0.01160 | 0.03843 |
| Zinc finger protein 827                  | ZNF827   | 1.804   | 0.00615 | 0.02588 |
| zinc finger protein 850 pseudogene       | ZNF850P  | 2.900   | 0.00001 | 0.00047 |
| zinc finger RNA binding protein          | ZFR      | -1.621  | 0.00935 | 0.03363 |
| zinc finger with KRAB and SCAN domains 4 | ZKSCAN4  | 2.119   | 0.00000 | 0.00009 |
| zinc finger, AN1-type domain 5           | ZFAND5   | -5.880  | 0.00000 | 0.00027 |
| zinc finger, CCHC domain containing 2    | ZCCHC2   | -1.978  | 0.01860 | 0.05251 |
| zinc finger, CCHC domain containing 24   | ZCCHC24  | 1.504   | 0.00016 | 0.00267 |
| zinc finger, DHHC-type containing 15     | ZDHHC15  | 1.771   | 0.00028 | 0.00369 |
| zinc finger, DHHC-type containing 9      | ZDHHC9   | 1.584   | 0.00129 | 0.00958 |
| zinc finger, FYVE domain containing 16   | ZFYVE16  | 2.517   | 0.00000 | 0.00018 |
| zinc finger, matrin type 3               | ZMAT3    | 2.210   | 0.00004 | 0.00112 |

|                                     |        |        |         |         |
|-------------------------------------|--------|--------|---------|---------|
| zinc finger, MIZ-type containing 1  | ZMIZ1  | 1.558  | 0.00051 | 0.00538 |
| zinc finger, MYND-type containing 8 | ZMYND8 | -1.534 | 0.00134 | 0.00981 |
| zinc finger, SWIM-type containing 5 | ZSWIM5 | 1.618  | 0.00041 | 0.00471 |
